# Supplementary material
Source: PubMed Central journal article supplement (PMC5437925)
Supplement: ismej2016191x4.pdf [file ismej2016191x4.pdf]

Supplementary Table S3 Breakdown of core gene cluster among TAO100 and 3 other *Nitrosococcus* species

| no. | cluster ID | gene annotation of <i>Ca. N. terrae</i>          | TAO100<br><i>Ca. N. terrae</i> | <i>N. halophilus</i> | <i>N. Oceani</i> | <i>N. watsonii</i> | annotation of orthologous group                                                        | core cluster | universal core cluster | 1 vs 1 cluster |
|-----|------------|--------------------------------------------------|--------------------------------|----------------------|------------------|--------------------|----------------------------------------------------------------------------------------|--------------|------------------------|----------------|
| 1   | 2193       | -                                                | -                              | NHAL_2177            | NOC_1945         | NWAT_1747          | hypothetical protein                                                                   | *            |                        |                |
| 2   | 2212       | -                                                | -                              | NHAL_2176            | NOC_1944         | NWAT_1746          | hypothetical protein                                                                   | *            |                        |                |
| 3   | 2188       | -                                                | -                              | NHAL_2188            | NOC_1943         | NWAT_1745          | hypothetical protein                                                                   | *            |                        |                |
| 4   | 683        | polysaccharide biosynthesis protein              | TAO_1215                       | NHAL_2193            | NOC_1942         | NWAT_1744          | polysaccharide biosynthesis protein                                                    | *            | *                      | *              |
| 5   | 2172       | -                                                | -                              | NHAL_2194            | NOC_1941         | NWAT_1740          | hypothetical protein                                                                   | *            |                        |                |
| 6   | 2058       | -                                                | -                              | NHAL_2195            | NOC_1940         | NWAT_1739          | hypothetical protein                                                                   | *            |                        |                |
| 7   | 2232       | -                                                | -                              | NHAL_2196            | NOC_1939         | NWAT_1738          | hypothetical protein                                                                   | *            |                        |                |
| 8   | 2467       | -                                                | -                              | -                    | NOC_1938         | NWAT_1737(3)       | Ig family protein                                                                      | *            |                        |                |
| 9   | 935        | VanZ family protein                              | TAO_1197                       | NHAL_2198            | NOC_1937         | NWAT_1736          | VanZ family protein                                                                    | *            | *                      | *              |
| 10  | 693        | peptidase S1 and S6 chymotrypsin/Hap             | TAO_1196                       | NHAL_2200            | NOC_1936         | NWAT_1735          | peptidase S1 and S6 chymotrypsin/Hap                                                   | *            | *                      | *              |
| 11  | 793        | RNA polymerase sigma factor RpoH                 | TAO_1195                       | NHAL_2201            | NOC_1935         | NWAT_1734          | RNA polymerase sigma factor RpoH                                                       | *            | *                      | *              |
| 12  | 930        | signal recognition particle-docking protein FtsY | TAO_1572                       | NHAL_2202            | NOC_1934         | NWAT_1733          | signal recognition particle-docking protein FtsY                                       | *            | *                      | *              |
| 13  | 1236       | peptidase M16                                    | TAO_1571                       | NHAL_2203            | NOC_1933         | NWAT_1732          | peptidase M16 domain-containing protein                                                | *            | *                      | *              |
| 14  | 1147       | peptidase M16-like zinc dependent peptidase      | TAO_1570                       | NHAL_2204            | NOC_1932         | NWAT_1731          | peptidase M16 domain-containing protein                                                | *            | *                      | *              |
| 15  | 386        | methyltransferase                                | TAO_1569                       | NHAL_2205            | NOC_1931         | NWAT_1730          | methyltransferase                                                                      | *            | *                      | *              |
| 16  | 449        | phosphopantetheine adenyltransferase             | TAO_1568                       | NHAL_2206            | NOC_1930         | NWAT_1729          | pantetheine-phosphate adenyltransferase                                                | *            | *                      | *              |
| 17  | 2692       | aldo/keto reductase                              | TAO_1566                       | NHAL_2208            | -                | -                  | aldo/keto reductase                                                                    | *            |                        |                |
| 18  | 1313       | gamma-glutamyltransferase                        | TAO_1565                       | NHAL_2210            | NOC_0769         | NWAT_2340          | γ-glutamyltransferase                                                                  | *            | *                      | *              |
| 19  | 2682       | initiation factor 2B-like protein                | TAO_1563                       | NHAL_2211            | -                | -                  | initiation factor 2B-like protein                                                      | *            |                        |                |
| 20  | 1448       | phosphoenolpyruvate carboxylase                  | TAO_1559                       | NHAL_2213            | NOC_0770         | NWAT_2339          | phosphoenolpyruvate carboxylase                                                        | *            | *                      | *              |
| 21  | 1285       | glycogen/starch synthase                         | TAO_1558                       | NHAL_2214            | NOC_0771         | NWAT_2338          | glycogen/starch synthase                                                               | *            | *                      | *              |
| 22  | 1305       | glucose-6-phosphate 1-dehydrogenase              | TAO_1557                       | NHAL_2215            | NOC_0772         | NWAT_2337          | glucose-6-phosphate 1-dehydrogenase                                                    | *            | *                      | *              |
| 23  | 1029       | dTDP-glucose 4,6-dehydratase                     | TAO_1556                       | NHAL_2216            | NOC_0773         | NWAT_2336          | DTDP-glucose 4,6-dehydratase                                                           | *            | *                      | *              |
| 24  | 971        | glucose-1-phosphate thymidyltransferase          | TAO_1555                       | NHAL_2217            | NOC_0774         | NWAT_2335          | glucose-1-phosphate thymidyltransferase                                                | *            | *                      | *              |
| 25  | 529        | dTDP-4-dehydrorhamnose 3,5-epimerase             | TAO_1554                       | NHAL_2218            | NOC_0775         | NWAT_2334          | DTDP-4-dehydrorhamnose 3,5-epimerase                                                   | *            | *                      | *              |
| 26  | 801        | dTDP-4-dehydrorhamnose reductase                 | TAO_1553                       | NHAL_2219            | NOC_0776         | NWAT_2333          | DTDP-4-dehydrorhamnose reductase                                                       | *            | *                      | *              |
| 27  | 2255       | -                                                | -                              | NHAL_2220            | NOC_0777         | NWAT_2332          | asparagine synthase                                                                    | *            |                        |                |
| 28  | 2056       | -                                                | -                              | NHAL_2221            | NOC_0778         | NWAT_2331          | aspartate/ornithine carbamoyltransferase carbamoyl-P binding domain-containing protein | *            |                        |                |
| 29  | 2376       | -                                                | -                              | NHAL_2222            | -                | NWAT_2330          | hypothetical protein                                                                   | *            |                        |                |
| 30  | 2199       | -                                                | -                              | NHAL_2223            | NOC_0779         | NWAT_2329          | Na <sup>+</sup> /solute symporter                                                      | *            |                        |                |
| 31  | 115        | isochorismatase                                  | TAO_0297                       | NHAL_2224            | NOC_0780         | NWAT_2328          | isochorismatase hydrolase                                                              | *            | *                      | *              |
| 32  | 2105       | -                                                | -                              | NHAL_2225            | NOC_0781         | NWAT_2327          | hydantoinase/carbamoylase family amidase                                               | *            |                        |                |
| 33  | 1680       | -                                                | -                              | NHAL_2226            | NOC_0782         | NWAT_2326          | hypothetical protein                                                                   | *            |                        |                |
| 34  | 2132       | -                                                | -                              | NHAL_2227            | NOC_0783         | NWAT_2325          | integral membrane sensor signal transduction histidine kinase                          | *            |                        |                |
| 35  | 1830       | -                                                | -                              | NHAL_2228            | NOC_0784         | NWAT_2324          | hypothetical protein                                                                   | *            |                        |                |
| 36  | 2119       | -                                                | -                              | NHAL_2229            | NOC_0785         | NWAT_2323          | putative two component sigma54 specific transcriptional regulator                      | *            |                        |                |
| 37  | 133        | peptidase S8                                     | TAO_0903(2)                    | NHAL_2234            | NOC_0787         | NWAT_1010(2)       | peptidase S8 and S53 subtilisin kexin sedolisin                                        | *            | *                      | *              |
| 38  | 1744       | -                                                | -                              | NHAL_2506            | NOC_2202         | NWAT_0890          | hypothetical protein                                                                   | *            |                        |                |
| 39  | 2231       | -                                                | -                              | NHAL_2507            | NOC_2201         | NWAT_0891          | hypothetical protein                                                                   | *            |                        |                |
| 40  | 1963       | -                                                | -                              | NHAL_2508            | NOC_2200         | NWAT_0892          | alpha/beta hydrolase fold protein                                                      | *            |                        |                |
| 41  | 2751       | -                                                | -                              | -                    | NOC_2195         | NWAT_0893          | hypothetical protein                                                                   | *            |                        |                |
| 42  | 462        | ErfK/YbiS/Ycfs/YnhG family protein               | TAO_0454                       | NHAL_2855            | NOC_2186         | NWAT_0900          | ErfK/YbiS/Ycfs/YnhG family protein                                                     | *            | *                      | *              |
| 43  | 2005       | -                                                | -                              | NHAL_2856            | NOC_2185         | NWAT_0901          | binding-protein-dependent transport system inner membrane protein                      | *            |                        |                |
| 44  | 1968       | -                                                | -                              | NHAL_2857            | NOC_2184         | NWAT_0902          | binding-protein-dependent transporters inner membrane component                        | *            |                        |                |
| 45  | 894        | glycoside hydrolase                              | TAO_0455                       | NHAL_2858            | NOC_2183         | NWAT_0903          | glycoside hydrolase                                                                    | *            | *                      | *              |
| 46  | 1353       | peptidase M61 domain-containing protein          | TAO_0860                       | NHAL_2617            | NOC_1493         | NWAT_1620          | peptidase M61 domain-containing protein                                                | *            | *                      | *              |
| 47  | 2173       | -                                                | -                              | NHAL_2616            | NOC_1492         | NWAT_1621          | NhaD family Na <sup>(+)</sup> /H <sup>(+)</sup> antiporter                             | *            |                        |                |

|    |      |                                                 |          |           |          |              |                                                                 |   |   |   |
|----|------|-------------------------------------------------|----------|-----------|----------|--------------|-----------------------------------------------------------------|---|---|---|
| 48 | 1040 | phospho-2-dehydro-3-deoxyheptonate aldolase     | TAO_0858 | NHAL_2615 | NOC_1491 | NWAT_1622    | phospho-2-dehydro-3-deoxyheptonate aldolase                     | * | * | * |
| 49 | 715  | TonB-dependent receptor                         | TAO_0250 | NHAL_2614 | NOC_1489 | NWAT_1623    | TonB-dependent receptor                                         | * | * | * |
| 50 | 1663 | -                                               | -        | NHAL_2891 | NOC_1488 | NWAT_1624    | roadblock/LC7 domain-contain protein                            | * |   |   |
| 51 | 968  | NnrS family protein                             | TAO_0748 | NHAL_2888 | NOC_1485 | NWAT_1626    | NnrS family protein                                             | * | * | * |
| 52 | 247  | hypothetical conserved protein                  | TAO_0747 | NHAL_2887 | NOC_1484 | NWAT_1628    | hypothetical protein                                            | * | * | * |
| 53 | 1622 | hypothetical conserved protein                  | TAO_0854 | -         | NOC_1482 | NWAT_1631    | hypothetical conserved protein                                  | * |   |   |
| 54 | 983  | hypothetical conserved protein                  | TAO_0745 | NHAL_2880 | NOC_1481 | NWAT_1635    | hypothetical protein                                            | * | * | * |
| 55 | 2683 | -                                               | -        | -         | NOC_1479 | NWAT_1636    | hypothetical protein                                            | * |   |   |
| 56 | 2777 | -                                               | -        | -         | NOC_1478 | NWAT_1637    | hypothetical protein                                            | * |   |   |
| 57 | 1762 | -                                               | -        | NHAL_2875 | NOC_1477 | NWAT_1638    | hypothetical protein                                            | * |   |   |
| 58 | 2582 | -                                               | -        | -         | NOC_1476 | NWAT_1639    | hypothetical protein                                            | * |   |   |
| 59 | 2336 | -                                               | -        | -         | NOC_1475 | NWAT_1640    | hypothetical protein                                            | * |   |   |
| 60 | 2329 | -                                               | -        | -         | NOC_1473 | NWAT_1641    | hypothetical protein                                            | * |   |   |
| 61 | 1854 | -                                               | -        | NHAL_1765 | NOC_1470 | NWAT_1642    | hypothetical protein                                            | * |   |   |
| 62 | 1895 | glutathione S-transferase                       | TAO_1353 | -         | NOC_1469 | NWAT_1643    | glutathione S-transferase                                       | * |   |   |
| 63 | 1608 | pirin                                           | TAO_1259 | -         | NOC_1468 | NWAT_1644    | pirin domain-containing protein                                 | * |   |   |
| 64 | 2470 | -                                               | -        | -         | NOC_1462 | NWAT_1647    | hypothetical protein                                            | * |   |   |
| 65 | 2616 | -                                               | -        | -         | NOC_1460 | NWAT_1649(1) | DNA methylase N-4/N-6 domain-containing protein                 | * |   |   |
| 66 | 1454 | peptidase M28                                   | TAO_0742 | NHAL_2872 | NOC_1459 | NWAT_1650    | peptidase M28                                                   | * | * | * |
| 67 | 1076 | WD40 domain-containing protein                  | TAO_0743 | NHAL_2871 | NOC_1458 | NWAT_1651    | WD-40-like beta propeller repeat-containing protein             | * | * | * |
| 68 | 1993 | -                                               | -        | NHAL_2474 | NOC_1457 | NWAT_1652    | 40-residue YVTN family beta-propeller repeat-containing protein | * |   |   |
| 69 | 2827 | -                                               | -        | -         | NOC_1456 | NWAT_1653    | major facilitator superfamily protein                           | * |   |   |
| 70 | 1920 | -                                               | -        | NHAL_1571 | NOC_1455 | NWAT_1654    | diacylglycerol kinase catalytic subunit                         | * |   |   |
| 71 | 1605 | -                                               | -        | NHAL_1570 | NOC_1454 | NWAT_1655    | hypothetical protein                                            | * |   |   |
| 72 | 2516 | -                                               | -        | -         | NOC_1453 | NWAT_1656    | hypothetical protein                                            | * |   |   |
| 73 | 2489 | -                                               | -        | -         | NOC_1452 | NWAT_1657    | hypothetical protein                                            | * |   |   |
| 74 | 2269 | -                                               | -        | NHAL_1563 | NOC_1446 | NWAT_1658    | phosphoenolpyruvate synthase                                    | * |   |   |
| 75 | 1551 | -                                               | -        | NHAL_1572 | NOC_1445 | NWAT_1659    | hypothetical protein                                            | * |   |   |
| 76 | 2589 | -                                               | -        | -         | NOC_1444 | NWAT_1660    | hypothetical protein                                            | * |   |   |
| 77 | 1588 | -                                               | -        | NHAL_2613 | NOC_1443 | NWAT_1661    | hypothetical protein                                            | * |   |   |
| 78 | 1817 | -                                               | -        | NHAL_1199 | NOC_2755 | NWAT_2886    | Csy4 family CRISPR-associated protein                           | * |   |   |
| 79 | 2034 | -                                               | -        | NHAL_1198 | NOC_2754 | NWAT_2885    | CRISPR-associated protein, Csy3 family                          | * |   |   |
| 80 | 1997 | -                                               | -        | NHAL_1197 | NOC_2753 | NWAT_2884    | CRISPR-associated protein Csy2                                  | * |   |   |
| 81 | 2116 | -                                               | -        | NHAL_1196 | NOC_2752 | NWAT_2883    | hypothetical protein                                            | * |   |   |
| 82 | 64   | CRISPR-associated protein cas1                  | TAO_1710 | NHAL_1195 | NOC_2751 | NWAT_2882    | CRISPR-associated protein cas1                                  | * | * | * |
| 83 | 879  | NUDIX hydrolase                                 | TAO_1171 | NHAL_1193 | NOC_2749 | NWAT_2880    | NUDIX hydrolase                                                 | * | * | * |
| 84 | 2494 | -                                               | -        | -         | NOC_2744 | NWAT_2870    | hypothetical protein                                            | * |   |   |
| 85 | 2568 | -                                               | -        | -         | NOC_2743 | NWAT_2869    | hypothetical protein                                            | * |   |   |
| 86 | 12   | hypothetical protein                            | TAO_1424 | NHAL_2523 | NOC_2738 | NWAT_2861    | XRE family transcriptional regulator                            | * | * | * |
| 87 | 2639 | -                                               | -        | -         | NOC_2737 | NWAT_2860    | hypothetical protein                                            | * |   |   |
| 88 | 2771 | -                                               | -        | -         | NOC_2736 | NWAT_2859    | hypothetical protein                                            | * |   |   |
| 89 | 2131 | -                                               | -        | NHAL_2543 | NOC_2734 | NWAT_2858    | family 57 glycoside hydrolase                                   | * |   |   |
| 90 | 1036 | hypothetical conserved protein                  | TAO_0768 | NHAL_2544 | NOC_2733 | NWAT_2857    | hypothetical protein                                            | * | * | * |
| 91 | 2700 | -                                               | -        | -         | NOC_2732 | NWAT_2856    | hypothetical protein                                            | * |   |   |
| 92 | 1792 | -                                               | -        | NHAL_2549 | NOC_2731 | NWAT_2824    | heat shock protein Hsp20                                        | * |   |   |
| 93 | 371  | heat shock protein Hsp20                        | TAO_0772 | NHAL_2550 | NOC_2730 | NWAT_2823    | heat shock protein Hsp20                                        | * | * | * |
| 94 | 1355 | glutathione ABC transporter ATP-binding protein | TAO_0773 | NHAL_2552 | NOC_2729 | NWAT_2822    | ABC transporter protein                                         | * | * | * |
| 95 | 388  | methionine-R-sulfoxide reductase                | TAO_0774 | NHAL_2553 | NOC_2728 | NWAT_2816    | methionine-R-sulfoxide reductase                                | * | * | * |
| 96 | 808  | thiamine biosynthesis lipoprotein ApbE          | TAO_0775 | NHAL_2554 | NOC_2727 | NWAT_2815    | ApbE family lipoprotein                                         | * | * | * |
| 97 | 1647 | -                                               | -        | NHAL_2556 | NOC_2724 | NWAT_2814    | hypothetical protein                                            | * |   |   |

|     |      |                                                               |          |           |          |           |                                                                             |   |   |   |
|-----|------|---------------------------------------------------------------|----------|-----------|----------|-----------|-----------------------------------------------------------------------------|---|---|---|
| 98  | 108  | hypothetical conserved protein                                | TAO_0209 | NHAL_0466 | NOC_2723 | NWAT_2813 | hypothetical protein                                                        | * | * | * |
| 99  | 2860 | -                                                             | -        | -         | NOC_2722 | NWAT_2812 | mammalian cell entry related domain-containing protein                      | * |   |   |
| 100 | 2823 | -                                                             | -        | -         | NOC_2721 | NWAT_2811 | PqiA family integral membrane protein                                       | * |   |   |
| 101 | 1982 | -                                                             | -        | NHAL_2557 | NOC_2719 | NWAT_2810 | ribonuclease BN                                                             | * |   |   |
| 102 | 2063 | -                                                             | -        | NHAL_2558 | NOC_2718 | NWAT_2809 | HAD-superfamily hydrolase                                                   | * |   |   |
| 103 | 129  | d-xylulose 5-phosphate/d-fructose 6-phosphate phosphoketolase | TAO_1345 | NHAL_0746 | NOC_2717 | NWAT_2808 | phosphoketolase                                                             | * | * | * |
| 104 | 362  | acetate kinase                                                | TAO_1344 | NHAL_3094 | NOC_2716 | NWAT_2807 | acetate kinase                                                              | * | * | * |
| 105 | 2767 | -                                                             | -        | -         | NOC_2715 | NWAT_2806 | zinc metalloprotease                                                        | * |   |   |
| 106 | 2542 | -                                                             | -        | -         | NOC_2713 | NWAT_2803 | hypothetical protein                                                        | * |   |   |
| 107 | 1500 | -                                                             | -        | NHAL_3130 | NOC_2712 | NWAT_2802 | AIG2 family protein                                                         | * |   |   |
| 108 | 2850 | -                                                             | -        | -         | NOC_2711 | NWAT_2801 | amino acid carrier protein                                                  | * |   |   |
| 109 | 2524 | -                                                             | -        | -         | NOC_2710 | NWAT_2800 | hypothetical protein                                                        | * |   |   |
| 110 | 2278 | -                                                             | -        | NHAL_1477 | NOC_2709 | NWAT_2799 | ATPase-like protein                                                         | * |   |   |
| 111 | 1846 | -                                                             | -        | NHAL_1478 | NOC_2708 | NWAT_2798 | hypothetical protein                                                        | * |   |   |
| 112 | 2240 | -                                                             | -        | NHAL_1482 | NOC_2707 | NWAT_2797 | aconitate hydratase                                                         | * |   |   |
| 113 | 2379 | -                                                             | -        | NHAL_1495 | -        | NWAT_2796 | hypothetical protein                                                        | * |   |   |
| 114 | 2237 | -                                                             | -        | NHAL_1498 | NOC_2706 | NWAT_2795 | hypothetical protein                                                        | * |   |   |
| 115 | 1535 | hypothetical conserved protein                                | TAO_1188 | NHAL_1500 | -        | NWAT_2794 | hypothetical conserved protein                                              | * |   |   |
| 116 | 650  | Sell domain-containing protein repeat-containing protein      | TAO_1186 | NHAL_1505 | NOC_2705 | NWAT_2792 | Sell domain-containing protein repeat-containing protein                    | * | * | * |
| 117 | 2001 | -                                                             | -        | NHAL_1506 | NOC_2704 | NWAT_2791 | metallo-β-lactamase superfamily protein                                     | * |   |   |
| 118 | 1121 | homoserine O-succinyltransferase                              | TAO_1185 | NHAL_1512 | NOC_2703 | NWAT_2790 | homoserine O-succinyltransferase                                            | * | * | * |
| 119 | 924  | hypothetical conserved protein                                | TAO_1184 | NHAL_1513 | NOC_2702 | NWAT_2789 | hypothetical protein                                                        | * | * | * |
| 120 | 35   | hypothetical conserved protein                                | TAO_1350 | NHAL_2113 | NOC_2700 | NWAT_2787 | hypothetical protein                                                        | * |   |   |
| 121 | 2196 | -                                                             | -        | NHAL_2116 | NOC_2699 | NWAT_2786 | FAD dependent oxidoreductase                                                | * |   |   |
| 122 | 2185 | -                                                             | -        | NHAL_2117 | NOC_2698 | NWAT_2785 | glycerol kinase                                                             | * |   |   |
| 123 | 1797 | -                                                             | -        | NHAL_2121 | NOC_2696 | NWAT_2784 | hypothetical protein                                                        | * |   |   |
| 124 | 2606 | -                                                             | -        | NHAL_2122 | NOC_2695 | -         | NADH:ubiquinone oxidoreductase complex 1 intermediate-associated protein 2a | * |   |   |
| 125 | 1555 | -                                                             | -        | NHAL_2123 | NOC_2694 | NWAT_0417 | hypothetical protein                                                        | * |   |   |
| 126 | 1096 | hypothetical conserved protein                                | TAO_1348 | NHAL_2127 | NOC_2693 | NWAT_0424 | hypothetical protein                                                        | * | * | * |
| 127 | 2733 | -                                                             | -        | -         | NOC_2692 | NWAT_0425 | DNA polymerase beta domain-containing protein                               | * |   |   |
| 128 | 2502 | -                                                             | -        | -         | NOC_2691 | NWAT_0426 | hypothetical protein                                                        | * |   |   |
| 129 | 661  | short-chain dehydrogenase/reductase SDR                       | TAO_0284 | NHAL_3361 | NOC_2690 | NWAT_0427 | short-chain dehydrogenase/reductase SDR                                     | * | * | * |
| 130 | 1694 | -                                                             | -        | NHAL_0752 | NOC_2688 | NWAT_0429 | restriction modification system DNA specificity domain-containing protein   | * |   |   |
| 131 | 788  | -                                                             | -        | NHAL_0751 | NOC_2687 | NWAT_0430 | N-6 DNA methylase                                                           | * |   |   |
| 132 | 1700 | -                                                             | -        | NHAL_0515 | NOC_2685 | NWAT_0431 | FlgN family protein                                                         | * |   |   |
| 133 | 128  | anti-sigma-28 factor FlgM                                     | TAO_0512 | NHAL_0516 | NOC_2684 | NWAT_0432 | anti-sigma-28 factor FlgM                                                   | * | * | * |
| 134 | 1841 | -                                                             | -        | NHAL_0517 | NOC_2683 | NWAT_0433 | flagella basal body P-ring formation protein FlgA                           | * |   |   |
| 135 | 2204 | -                                                             | -        | NHAL_0521 | NOC_2682 | NWAT_0434 | PAS/PAC sensor(s)-containing diguanylate cyclase/phosphodiesterase          | * |   |   |
| 136 | 1692 | lactoylglutathione lyase                                      | TAO_0513 | -         | NOC_2681 | NWAT_0435 | lactoylglutathione lyase                                                    | * |   |   |
| 137 | 895  | 5,10-methylenetetrahydrofolate reductase                      | TAO_0514 | NHAL_0522 | NOC_2680 | NWAT_0436 | 5,10-methylenetetrahydrofolate reductase                                    | * | * | * |
| 138 | 1295 | adenosylhomocysteinase                                        | TAO_0515 | NHAL_0523 | NOC_2679 | NWAT_0437 | S-adenosyl-L-homocysteine hydrolase                                         | * | * | * |
| 139 | 1185 | S-adenosylmethionine synthetase                               | TAO_0516 | NHAL_0524 | NOC_2678 | NWAT_0438 | S-adenosylmethionine synthetase                                             | * | * | * |
| 140 | 169  | hypothetical conserved protein                                | TAO_0519 | NHAL_0525 | NOC_2677 | NWAT_0439 | hypothetical protein                                                        | * | * | * |
| 141 | 962  | tetraacyldisaccharide 4'-kinase                               | TAO_0520 | NHAL_0526 | NOC_2676 | NWAT_0440 | tetraacyldisaccharide 4'-kinase                                             | * | * | * |
| 142 | 1307 | lipid A export ATP-binding/permease MsbA                      | TAO_0521 | NHAL_0527 | NOC_2675 | NWAT_0441 | lipid A export ATP-binding/permease MsbA                                    | * | * | * |
| 143 | 1668 | -                                                             | -        | NHAL_0528 | NOC_2674 | NWAT_0442 | biopolymer transport protein exbD/TolR                                      | * |   |   |
| 144 | 1858 | -                                                             | -        | NHAL_0529 | NOC_2673 | NWAT_0443 | MotA/TolQ/exbB proton channel                                               | * |   |   |
| 145 | 1417 | DNA internalization-related competence protein comEC/Rec2     | TAO_0523 | NHAL_0530 | NOC_2672 | NWAT_0444 | DNA internalization-related competence protein comEC/Rec2                   | * | * | * |
| 146 | 459  | ATP-binding protein                                           | TAO_0524 | NHAL_0531 | NOC_2671 | NWAT_0445 | ATP-binding protein                                                         | * | * | * |

|     |      |                                                                  |          |           |          |           |                                                                   |   |   |   |
|-----|------|------------------------------------------------------------------|----------|-----------|----------|-----------|-------------------------------------------------------------------|---|---|---|
| 147 | 639  | lipoprotein releasing system, ATP-binding protein                | TAO_0525 | NHAL_0532 | NOC_2670 | NWAT_0446 | lipoprotein releasing system, ATP-binding protein                 | * | * | * |
| 148 | 1177 | lipoprotein releasing system transmembrane protein LolC          | TAO_0527 | NHAL_0533 | NOC_2669 | NWAT_0447 | LolC/E family lipoprotein releasing system, transmembrane protein | * | * | * |
| 149 | 1570 | -                                                                | -        | NHAL_0534 | NOC_2668 | NWAT_0448 | <b>type IV pilus assembly pilZ</b>                                | * | * | * |
| 150 | 688  | ribose 5-phosphate isomerase                                     | TAO_0528 | NHAL_0535 | NOC_2667 | NWAT_0449 | ribose 5-phosphate isomerase                                      | * | * | * |
| 151 | 1303 | threonine dehydratase, biosynthetic                              | TAO_0529 | NHAL_0536 | NOC_2666 | NWAT_0450 | threonine dehydratase, biosynthetic                               | * | * | * |
| 152 | 1439 | leucyl-tRNA synthetase                                           | TAO_0530 | NHAL_0537 | NOC_2665 | NWAT_0451 | leucyl-tRNA synthetase                                            | * | * | * |
| 153 | 337  | rare lipoprotein B                                               | TAO_0531 | NHAL_0538 | NOC_2664 | NWAT_0452 | rare lipoprotein B                                                | * | * | * |
| 154 | 871  | DNA polymerase III subunit delta                                 | TAO_0532 | NHAL_0539 | NOC_2663 | NWAT_0453 | DNA polymerase III subunit delta                                  | * | * | * |
| 155 | 1164 | gamma-glutamyl phosphate reductase                               | TAO_0533 | NHAL_0540 | NOC_2662 | NWAT_0454 | γ-glutamyl phosphate reductase                                    | * | * | * |
| 156 | 617  | nicotinic acid mononucleotide adenyltransferase                  | TAO_0534 | NHAL_0541 | NOC_2661 | NWAT_0455 | nicotinic acid mononucleotide adenyltransferase                   | * | * | * |
| 157 | 290  | iojap-like protein                                               | TAO_0535 | NHAL_0542 | NOC_2660 | NWAT_0456 | iojap-like protein                                                | * | * | * |
| 158 | 452  | 50S rRNA methyltransferase                                       | TAO_0536 | NHAL_0543 | NOC_2659 | NWAT_0457 | 50S rRNA methyltransferase                                        | * | * | * |
| 159 | 397  | Maf protein                                                      | TAO_0537 | NHAL_0544 | NOC_2658 | NWAT_0458 | Maf protein                                                       | * | * | * |
| 160 | 1302 | Rne/Rng family ribonuclease                                      | TAO_0538 | NHAL_0545 | NOC_2657 | NWAT_0459 | Rne/Rng family ribonuclease                                       | * | * | * |
| 161 | 1436 | hypothetical conserved protein                                   | TAO_0539 | NHAL_0546 | NOC_2656 | NWAT_0460 | hypothetical protein                                              | * | * | * |
| 162 | 899  | nitrilase/cyanide hydratase and apolipoprotein N-acyltransferase | TAO_0540 | NHAL_0547 | NOC_2655 | NWAT_0461 | nitrilase/cyanide hydratase and apolipoprotein N-acyltransferase  | * | * | * |
| 163 | 1085 | tRNA (5-methylaminomethyl-2-thiouridylate)-methyltransferase     | TAO_0541 | NHAL_0549 | NOC_2654 | NWAT_0463 | tRNA (5-methylaminomethyl-2-thiouridylate)-methyltransferase      | * | * | * |
| 164 | 185  | sirA family protein                                              | TAO_0542 | NHAL_0550 | NOC_2653 | NWAT_0464 | SirA family protein                                               | * | * | * |
| 165 | 1317 | glutamine synthetase                                             | TAO_0543 | NHAL_0551 | NOC_2652 | NWAT_0465 | glutamine synthetase                                              | * | * | * |
| 166 | 1658 | hypothetical conserved protein                                   | TAO_1414 | -         | NOC_2651 | NWAT_0466 | hypothetical conserved protein                                    | * | * | * |
| 167 | 390  | hypothetical conserved protein                                   | TAO_0545 | NHAL_0552 | NOC_2650 | NWAT_0467 | hypothetical protein                                              | * | * | * |
| 168 | 1529 | -                                                                | -        | NHAL_0553 | NOC_2649 | NWAT_0468 | <b>hypothetical protein</b>                                       | * | * | * |
| 169 | 797  | formamidopyrimidine-DNA glycosylase                              | TAO_0546 | NHAL_0554 | NOC_2648 | NWAT_0469 | formamidopyrimidine-DNA glycosylase                               | * | * | * |
| 170 | 632  | hypothetical conserved protein                                   | TAO_0547 | NHAL_0555 | NOC_2647 | NWAT_0470 | hypothetical protein                                              | * | * | * |
| 171 | 1151 | ABC transporter                                                  | TAO_0548 | NHAL_0556 | NOC_2646 | NWAT_0471 | ABC transporter                                                   | * | * | * |
| 172 | 809  | ABC transporter permease                                         | TAO_0549 | NHAL_0557 | NOC_2645 | NWAT_0472 | ABC transporter permease                                          | * | * | * |
| 173 | 936  | ABC transporter ATP-binding protein                              | TAO_0550 | NHAL_0558 | NOC_2644 | NWAT_0473 | ABC transporter protein                                           | * | * | * |
| 174 | 1740 | -                                                                | -        | NHAL_0559 | NOC_2643 | NWAT_0474 | <b>NUDIX hydrolase</b>                                            | * | * | * |
| 175 | 150  | -                                                                | -        | NHAL_0561 | NOC_2641 | NWAT_0476 | 50S ribosomal protein L33                                         | * | * | * |
| 176 | 219  | -                                                                | -        | NHAL_0562 | NOC_2640 | NWAT_0477 | 50S ribosomal protein L28                                         | * | * | * |
| 177 | 732  | -                                                                | -        | NHAL_0563 | NOC_2639 | NWAT_0478 | endonuclease/exonuclease/phosphatase                              | * | * | * |
| 178 | 1087 | -                                                                | -        | NHAL_0564 | NOC_2638 | NWAT_0479 | NAD-dependent epimerase/dehydratase                               | * | * | * |
| 179 | 1221 | UDP-glucose/GDP-mannose dehydrogenase family protein             | TAO_0555 | NHAL_0565 | NOC_2637 | NWAT_0480 | UDP-glucose/GDP-mannose dehydrogenase                             | * | * | * |
| 180 | 1298 | glutamyl-tRNA(Gln) amidotransferase subunit A                    | TAO_0556 | NHAL_0566 | NOC_2636 | NWAT_0481 | glutamyl-tRNA(Gln) amidotransferase subunit A                     | * | * | * |
| 181 | 218  | glutamyl-tRNA(Gln) amidotransferase subunit C                    | TAO_0557 | NHAL_0567 | NOC_2635 | NWAT_0482 | glutamyl-tRNA(Gln) amidotransferase subunit C                     | * | * | * |
| 182 | 921  | lytic murein transglycosylase B                                  | TAO_0558 | NHAL_0573 | NOC_2634 | NWAT_0483 | lytic murein transglycosylase B                                   | * | * | * |
| 183 | 545  | lipoprotein A                                                    | TAO_0559 | NHAL_0574 | NOC_2633 | NWAT_0484 | rare lipoprotein A                                                | * | * | * |
| 184 | 1049 | D-alanyl-D-alanine carboxypeptidase                              | TAO_0560 | NHAL_0575 | NOC_2632 | NWAT_0485 | serine-type D-Ala-D-Ala carboxypeptidase                          | * | * | * |
| 185 | 822  | D-amino acid aminotransferase                                    | TAO_0561 | NHAL_0576 | NOC_2631 | NWAT_0486 | D-amino acid aminotransferase                                     | * | * | * |
| 186 | 563  | lipoate-protein ligase B                                         | TAO_0562 | NHAL_0577 | NOC_2630 | NWAT_0487 | lipoate-protein ligase B                                          | * | * | * |
| 187 | 1035 | lipoyl synthase                                                  | TAO_0563 | NHAL_0579 | NOC_2629 | NWAT_0488 | lipoic acid synthetase                                            | * | * | * |
| 188 | 1171 | 2-methylcitrate synthase/citrate synthase II                     | TAO_0564 | NHAL_0580 | NOC_2628 | NWAT_0489 | 2-methylcitrate synthase/citrate synthase II                      | * | * | * |
| 189 | 985  | lysine 2,3-aminomutase YodO family protein                       | TAO_0565 | NHAL_0581 | NOC_2627 | NWAT_0490 | lysine 2,3-aminomutase YodO family protein                        | * | * | * |
| 190 | 620  | elongation factor P                                              | TAO_0566 | NHAL_0582 | NOC_2626 | NWAT_0491 | translation elongation factor P                                   | * | * | * |
| 191 | 906  | lysyl-tRNA synthetase-related protein                            | TAO_0567 | NHAL_0583 | NOC_2625 | NWAT_0492 | lysyl-tRNA synthetase-like protein GenX                           | * | * | * |
| 192 | 136  | hypothetical conserved protein                                   | TAO_0348 | NHAL_3516 | NOC_2624 | NWAT_0493 | hypothetical protein                                              | * | * | * |
| 193 | 2095 | -                                                                | -        | NHAL_3513 | NOC_2623 | NWAT_0494 | <b>coenzyme PQQ biosynthesis protein E</b>                        | * | * | * |
| 194 | 1593 | -                                                                | -        | NHAL_3512 | NOC_2622 | NWAT_0495 | <b>coenzyme PQQ synthesis D</b>                                   | * | * | * |
| 195 | 1946 | -                                                                | -        | NHAL_3511 | NOC_2621 | NWAT_0496 | <b>coenzyme PQQ biosynthesis protein C</b>                        | * | * | * |
| 196 | 2009 | -                                                                | -        | NHAL_3510 | NOC_2620 | NWAT_0497 | <b>coenzyme PQQ biosynthesis protein B</b>                        | * | * | * |

|     |      |                                                                                        |          |           |           |                                            |                                                                                 |   |   |   |
|-----|------|----------------------------------------------------------------------------------------|----------|-----------|-----------|--------------------------------------------|---------------------------------------------------------------------------------|---|---|---|
| 197 | 2328 | -                                                                                      | -        | NHAL_3509 | NWAT_0498 | <b>coenzyme PQQ biosynthesis protein A</b> | *                                                                               |   |   |   |
| 198 | 1176 | <b>peptidase M48, Ste24p</b>                                                           | TAO_0349 | NHAL_3508 | NOC_2619  | NWAT_0499                                  | peptidase M48 Ste24p                                                            | * | * | * |
| 199 | 182  | <b>sirA family protein</b>                                                             | TAO_0350 | NHAL_3507 | NOC_2618  | NWAT_0500                                  | SirA family protein                                                             | * | * | * |
| 200 | 607  | <b>protein-L-isoaspartate(D-aspartate) O-methyltransferase</b>                         | TAO_0351 | NHAL_3506 | NOC_2617  | NWAT_0501                                  | protein-L-isoaspartate(D-aspartate) O-methyltransferase                         | * | * | * |
| 201 | 1047 | <b>TolC family type I secretion outer membrane protein</b>                             | TAO_0352 | NHAL_3505 | NOC_2616  | NWAT_0502                                  | TolC family type I secretion outer membrane protein                             | * | * | * |
| 202 | 1110 | <b>3-deoxy-D-manno-octulosonic-acid transferase domain-containing protein</b>          | TAO_0353 | NHAL_3504 | NOC_2615  | NWAT_0503                                  | 3-deoxy-D-manno-octulosonic-acid transferase domain-containing protein          | * | * | * |
| 203 | 977  | <b>ADP-L-glycero-D-manno-heptose-6-epimerase</b>                                       | TAO_0354 | NHAL_3503 | NOC_2614  | NWAT_0504                                  | ADP-L-glycero-D-manno-heptose-6-epimerase                                       | * | * | * |
| 204 | 1130 | <b>bifunctional heptose 7-phosphate kinase/heptose 1-phosphate adenylyltransferase</b> | TAO_0355 | NHAL_3502 | NOC_2613  | NWAT_0505                                  | bifunctional heptose 7-phosphate kinase/heptose 1-phosphate adenylyltransferase | * | * | * |
| 205 | 957  | <b>multicopper oxidase</b>                                                             | TAO_0356 | NHAL_3501 | NOC_2612  | NWAT_0506                                  | ferroxidase                                                                     | * | * | * |
| 206 | 1232 | <b>DEAD/DEAH box helicase</b>                                                          | TAO_0357 | NHAL_3500 | NOC_2611  | NWAT_0507                                  | DEAD/DEAH box helicase                                                          | * | * | * |
| 207 | 237  | <b>RNA-binding protein, RNP-1</b>                                                      | TAO_0358 | NHAL_3499 | NOC_2610  | NWAT_0508                                  | RNP-1 like RNA-binding protein                                                  | * | * | * |
| 208 | 202  | <b>cold-shock DNA-binding domain-containing protein</b>                                | TAO_0359 | NHAL_3498 | NOC_2609  | NWAT_0509                                  | cold-shock DNA-binding domain-containing protein                                | * | * | * |
| 209 | 2149 | -                                                                                      | -        | NHAL_3495 | NOC_2608  | NWAT_0510                                  | <b>peptidase M24</b>                                                            | * |   |   |
| 210 | 342  | <b>acetylornithine deacetylase</b>                                                     | TAO_1580 | NHAL_3494 | NOC_2607  | NWAT_0511                                  | acetylornithine deacetylase argE                                                | * | * | * |
| 211 | 2022 | -                                                                                      | -        | NHAL_3493 | NOC_2606  | NWAT_0512                                  | <b>threonine aldolase</b>                                                       | * |   |   |
| 212 | 2187 | -                                                                                      | -        | NHAL_3492 | NOC_2605  | NWAT_0513                                  | <b>retinal dehydrogenase</b>                                                    | * |   |   |
| 213 | 857  | <b>pyridoxal-5'-phosphate-dependent protein subunit beta</b>                           | TAO_0139 | NHAL_3487 | NOC_2604  | NWAT_0514                                  | pyridoxal-5'-phosphate-dependent protein subunit beta                           | * | * | * |
| 214 | 399  | <b>cytidine/deoxycytidylate deaminase</b>                                              | TAO_1685 | NHAL_3743 | NOC_2603  | NWAT_0516                                  | CMP/dCMP deaminase zinc-binding protein                                         | * | * | * |
| 215 | 1046 | <b>hypothetical conserved protein</b>                                                  | TAO_1684 | NHAL_3741 | NOC_2601  | NWAT_0517                                  | hypothetical protein                                                            | * | * | * |
| 216 | 1798 | -                                                                                      | -        | NHAL_3740 | NOC_2600  | NWAT_0518                                  | <b>hypothetical protein</b>                                                     | * |   |   |
| 217 | 1815 | -                                                                                      | -        | NHAL_3739 | NOC_2599  | NWAT_0519                                  | <b>disulfide bond formation protein DsbB</b>                                    | * |   |   |
| 218 | 193  | <b>translation initiation factor IF-1</b>                                              | TAO_1683 | NHAL_3737 | NOC_2598  | NWAT_0520                                  | translation initiation factor IF-1                                              | * | * | * |
| 219 | 1892 | -                                                                                      | -        | NHAL_3736 | NOC_2597  | NWAT_0521                                  | <b>arginyl-tRNA-protein transferase</b>                                         | * |   |   |
| 220 | 714  | <b>leucyl/phenylalanyl-tRNA/protein transferase</b>                                    | TAO_1682 | NHAL_3735 | NOC_2596  | NWAT_0522                                  | leucyl/phenylalanyl-tRNA--protein transferase                                   | * | * | * |
| 221 | 600  | <b>recombination protein RecR</b>                                                      | TAO_1681 | NHAL_3733 | NOC_2595  | NWAT_0523                                  | recombination protein RecR                                                      | * | * | * |
| 222 | 314  | <b>hypothetical conserved protein</b>                                                  | TAO_1680 | NHAL_3732 | NOC_2594  | NWAT_0524                                  | hypothetical protein                                                            | * | * | * |
| 223 | 1258 | <b>DNA polymerase III subunits gamma and tau</b>                                       | TAO_1679 | NHAL_3731 | NOC_2593  | NWAT_0525                                  | DNA polymerase III subunits gamma and tau                                       | * | * | * |
| 224 | 1240 | <b>transcription termination factor rho</b>                                            | TAO_1678 | NHAL_3730 | NOC_2592  | NWAT_0527                                  | transcription termination factor rho                                            | * | * | * |
| 225 | 860  | <b>tRNA delta(2)-isopentenylpyrophosphate transferase</b>                              | TAO_1677 | NHAL_3729 | NOC_2591  | NWAT_0528                                  | tRNA delta(2)-isopentenylpyrophosphate transferase                              | * | * | * |
| 226 | 217  | <b>RNA chaperone Hfq</b>                                                               | TAO_1676 | NHAL_3728 | NOC_2590  | NWAT_0529                                  | RNA chaperone Hfq                                                               | * | * | * |
| 227 | 1053 | <b>GTP-binding protein HflX</b>                                                        | TAO_1675 | NHAL_3727 | NOC_2589  | NWAT_0530                                  | GTP-binding protein HflX                                                        | * | * | * |
| 228 | 1084 | <b>HflK protein</b>                                                                    | TAO_1674 | NHAL_3726 | NOC_2588  | NWAT_0531                                  | HflK protein                                                                    | * | * | * |
| 229 | 872  | <b>HflC protein</b>                                                                    | TAO_1673 | NHAL_3725 | NOC_2587  | NWAT_0532                                  | HflC protein                                                                    | * | * | * |
| 230 | 1075 | <b>ATP phosphoribosyltransferase regulatory subunit</b>                                | TAO_1672 | NHAL_3724 | NOC_2586  | NWAT_0533                                  | histidyl-tRNA synthetase 2                                                      | * | * | * |
| 231 | 1195 | <b>adenylosuccinate synthetase</b>                                                     | TAO_1671 | NHAL_3723 | NOC_2585  | NWAT_0534                                  | adenylosuccinate synthetase                                                     | * | * | * |
| 232 | 1730 | -                                                                                      | -        | NHAL_3721 | NOC_2584  | NWAT_0535                                  | <b>17 kDa surface antigen</b>                                                   | * |   |   |
| 233 | 294  | <b>thioredoxin</b>                                                                     | TAO_1720 | NHAL_3720 | NOC_2583  | NWAT_0536                                  | thioredoxin                                                                     | * | * | * |
| 234 | 2085 | -                                                                                      | -        | NHAL_3719 | NOC_2582  | NWAT_0537                                  | <b>DEAD/DEAH box helicase</b>                                                   | * |   |   |
| 235 | 992  | <b>ubiquinone biosynthesis hydroxylase, UbiH/UbiF/VisC/COQ6</b>                        | TAO_0391 | NHAL_3718 | NOC_2581  | NWAT_0538                                  | ubiquinone biosynthesis hydroxylase, UbiH/UbiF/VisC/COQ6 family                 | * | * | * |
| 236 | 1056 | <b>2-polyprenyl-6-methoxyphenol 4-hydroxylase UbiH</b>                                 | TAO_0392 | NHAL_3717 | NOC_2580  | NWAT_0539                                  | 2-polyprenyl-6-methoxyphenol 4-hydroxylase UbiH                                 | * | * | * |
| 237 | 1233 | <b>peptidase M24</b>                                                                   | TAO_0393 | NHAL_3716 | NOC_2579  | NWAT_0540                                  | peptidase M24                                                                   | * | * | * |
| 238 | 1755 | -                                                                                      | -        | NHAL_3715 | NOC_2578  | NWAT_0541                                  | <b>hypothetical protein</b>                                                     | * |   |   |
| 239 | 137  | <b>hypothetical conserved protein</b>                                                  | TAO_0394 | NHAL_3714 | NOC_2577  | NWAT_0542                                  | hypothetical protein                                                            | * | * | * |
| 240 | 255  | <b>hypothetical conserved protein</b>                                                  | TAO_0395 | NHAL_3713 | NOC_2576  | NWAT_0543                                  | hypothetical protein                                                            | * | * | * |
| 241 | 754  | <b>shikimate 5-dehydrogenase</b>                                                       | TAO_0396 | NHAL_3712 | NOC_2575  | NWAT_0544                                  | shikimate 5-dehydrogenase                                                       | * | * | * |
| 242 | 1012 | <b>delta-aminolevulinic acid dehydratase</b>                                           | TAO_0397 | NHAL_3711 | NOC_2574  | NWAT_0545                                  | delta-aminolevulinic acid dehydratase                                           | * | * | * |
| 243 | 1081 | <b>carbamoyl-phosphate synthase small subunit</b>                                      | TAO_0398 | NHAL_3710 | NOC_2573  | NWAT_0546                                  | carbamoyl-phosphate synthase, small subunit                                     | * | * | * |
| 244 | 1457 | <b>carbamoyl-phosphate synthase, large subunit</b>                                     | TAO_0399 | NHAL_3709 | NOC_2572  | NWAT_0547                                  | carbamoyl-phosphate synthase large subunit                                      | * | * | * |
| 245 | 438  | <b>transcription elongation factor GreA</b>                                            | TAO_0400 | NHAL_3708 | NOC_2571  | NWAT_0548                                  | transcription elongation factor GreA                                            | * | * | * |

|     |      |                                                                         |          |           |          |           |                                                                        |   |   |   |
|-----|------|-------------------------------------------------------------------------|----------|-----------|----------|-----------|------------------------------------------------------------------------|---|---|---|
| 246 | 588  | ribosomal RNA methyltransferase RrmJ/FtsJ                               | TAO_0401 | NHAL_3707 | NOC_2570 | NWAT_0550 | ribosomal RNA methyltransferase RrmJ/FtsJ                              | * | * | * |
| 247 | 1391 | ATP-dependent metalloprotease                                           | TAO_0402 | NHAL_3706 | NOC_2569 | NWAT_0551 | ATP-dependent metalloprotease FtsH                                     | * | * | * |
| 248 | 734  | dihydropteroate synthase                                                | TAO_0403 | NHAL_3704 | NOC_2568 | NWAT_0552 | dihydropteroate synthase                                               | * | * | * |
| 249 | 1205 | phosphoglucosamine mutase                                               | TAO_0404 | NHAL_3703 | NOC_2567 | NWAT_0553 | phosphoglucosamine mutase                                              | * | * | * |
| 250 | 598  | triosephosphate isomerase                                               | TAO_0405 | NHAL_3702 | NOC_2566 | NWAT_0554 | triosephosphate isomerase                                              | * | * | * |
| 251 | 1615 | preprotein translocase subunit SecG                                     | TAO_0406 | NHAL_3701 |          | NWAT_0555 | preprotein translocase subunit SecG                                    | * |   |   |
| 252 | 425  | NADH-ubiquinone/plastoquinone oxidoreductase subunit 3                  | TAO_0407 | NHAL_3700 | NOC_2565 | NWAT_0556 | NADH-ubiquinone/plastoquinone oxidoreductase chain 3                   | * | * | * |
| 253 | 572  | NADH dehydrogenase subunit B                                            | TAO_0408 | NHAL_3699 | NOC_2564 | NWAT_0557 | NADH-quinone oxidoreductase subunit B                                  | * | * | * |
| 254 | 690  | NADH (or F420H2) dehydrogenase subunit C                                | TAO_0409 | NHAL_3698 | NOC_2563 | NWAT_0558 | NADH dehydrogenase subunit C                                           | * | * | * |
| 255 | 1289 | NADH dehydrogenase I subunit D                                          | TAO_0410 | NHAL_3697 | NOC_2562 | NWAT_0559 | NADH dehydrogenase I subunit D                                         | * | * | * |
| 256 | 471  | NADH-quinone oxidoreductase subunit E                                   | TAO_0411 | NHAL_3696 | NOC_2561 | NWAT_0560 | NADH-quinone oxidoreductase subunit E                                  | * | * | * |
| 257 | 1275 | NADH-quinone oxidoreductase subunit F                                   | TAO_0412 | NHAL_3695 | NOC_2560 | NWAT_0561 | NADH-quinone oxidoreductase subunit F                                  | * | * | * |
| 258 | 1422 | NADH-quinone oxidoreductase subunit G                                   | TAO_0413 | NHAL_3694 | NOC_2559 | NWAT_0562 | NADH-quinone oxidoreductase subunit G                                  | * | * | * |
| 259 | 1140 | NADH:ubiquinone oxidoreductase subunit H                                | TAO_0414 | NHAL_3693 | NOC_2558 | NWAT_0563 | NADH dehydrogenase                                                     | * | * | * |
| 260 | 601  | NADH-quinone oxidoreductase subunit I                                   | TAO_0415 | NHAL_3692 | NOC_2557 | NWAT_0564 | NADH-quinone oxidoreductase subunit I                                  | * | * | * |
| 261 | 584  | NADH-ubiquinone/plastoquinone oxidoreductase chain 6                    | TAO_0416 | NHAL_3691 | NOC_2556 | NWAT_0565 | NADH-ubiquinone/plastoquinone oxidoreductase chain 6                   | * | * | * |
| 262 | 242  | NADH-quinone oxidoreductase subunit K                                   | TAO_0417 | NHAL_3690 | NOC_2555 | NWAT_0566 | NADH-ubiquinone oxidoreductase subunit 4l                              | * | * | * |
| 263 | 1398 | NADH:ubiquinone oxidoreductase subunit L                                | TAO_0418 | NHAL_3689 | NOC_2554 | NWAT_0567 | proton-translocating NADH-quinone oxidoreductase subunit l             | * | * | * |
| 264 | 1325 | proton-translocating NADH-quinone oxidoreductase, chain M               | TAO_0419 | NHAL_3688 | NOC_2553 | NWAT_0568 | proton-translocating NADH-quinone oxidoreductase, chain M              | * | * | * |
| 265 | 1290 | NADH:ubiquinone oxidoreductase subunit N                                | TAO_0420 | NHAL_3687 | NOC_2552 | NWAT_0569 | proton-translocating NADH-quinone oxidoreductase subunit N             | * | * | * |
| 266 | 163  | NADPH:quinone oxidoreductase                                            | TAO_1034 | NHAL_3686 | NOC_2551 | NWAT_0570 | alcohol dehydrogenase zinc-binding domain-containing protein           | * | * | * |
| 267 | 886  | pseudouridine synthase RluD                                             | TAO_0421 | NHAL_3685 | NOC_2550 | NWAT_0571 | pseudouridine synthase                                                 | * | * | * |
| 268 | 1392 | thioredoxin                                                             | TAO_0422 | NHAL_3684 | NOC_2549 | NWAT_0572 | thioredoxin                                                            | * | * | * |
| 269 | 973  | PfkB domain-containing protein                                          | TAO_0423 | NHAL_3683 | NOC_2548 | NWAT_0573 | PfkB domain-containing protein                                         | * | * | * |
| 270 | 1312 | glycine dehydrogenase subunit 2                                         | TAO_0424 | NHAL_3681 | NOC_2547 | NWAT_0574 | glycine dehydrogenase subunit 2                                        | * | * | * |
| 271 | 41   | -                                                                       | -        | NHAL_0601 | NOC_2546 | NWAT_0575 | hypothetical protein                                                   | * |   |   |
| 272 | 1734 | -                                                                       | -        | NHAL_0638 | NOC_2534 | NWAT_0598 | hypothetical protein                                                   | * |   |   |
| 273 | 2138 | -                                                                       | -        | NHAL_0640 | NOC_2533 | NWAT_0599 | multi anti extrusion protein MatE                                      | * |   |   |
| 274 | 523  | OmpA/MotB domain-containing protein                                     | TAO_1539 | NHAL_0641 | NOC_2532 | NWAT_0600 | OmpA/MotB domain-containing protein                                    | * | * | * |
| 275 | 1691 | -                                                                       | -        | NHAL_0642 | NOC_2531 | NWAT_0601 | hypothetical protein                                                   | * |   |   |
| 276 | 2198 | -                                                                       | -        | NHAL_0643 | NOC_2530 | NWAT_0602 | hypothetical protein                                                   | * |   |   |
| 277 | 1643 | -                                                                       | -        | NHAL_0644 | NOC_2529 | NWAT_0603 | hypothetical protein                                                   | * |   |   |
| 278 | 1190 | ribonucleotide-diphosphate reductase subunit beta                       | TAO_1538 | NHAL_0646 | NOC_2528 | NWAT_0605 | ribonucleotide-diphosphate reductase subunit beta                      | * | * | * |
| 279 | 1426 | ribonucleoside-diphosphate reductase                                    | TAO_1537 | NHAL_0647 | NOC_2527 | NWAT_0606 | ribonucleoside-diphosphate reductase                                   | * | * | * |
| 280 | 447  | alkyl hydroperoxide reductase/ thiol specific antioxidant/ mal allergen | TAO_1536 | NHAL_0649 | NOC_2526 | NWAT_0608 | alkyl hydroperoxide reductase/thiol specific antioxidant/ mal allergen | * | * | * |
| 281 | 431  | glycine cleavage system transcriptional repressor                       | TAO_1535 | NHAL_0650 | NOC_2525 | NWAT_0609 | glycine cleavage system transcriptional repressor                      | * | * | * |
| 282 | 875  | dihydrodipicolinate synthase                                            | TAO_1534 | NHAL_0651 | NOC_2524 | NWAT_0610 | dihydrodipicolinate synthase                                           | * | * | * |
| 283 | 863  | NlpB/DapX lipoprotein                                                   | TAO_1533 | NHAL_0652 | NOC_2523 | NWAT_0611 | NlpB/DapX lipoprotein                                                  | * | * | * |
| 284 | 807  | phosphoribosylaminoimidazole-succinocarboxamide synthase                | TAO_1532 | NHAL_0653 | NOC_2522 | NWAT_0612 | phosphoribosylaminoimidazole-succinocarboxamide synthase               | * | * | * |
| 285 | 1027 | dihydroorotase                                                          | TAO_1531 | NHAL_0654 | NOC_2521 | NWAT_0613 | dihydroorotase                                                         | * | * | * |
| 286 | 1374 | acetolactate synthase large subunit                                     | TAO_1530 | NHAL_0655 | NOC_2520 | NWAT_0614 | acetolactate synthase large subunit biosynthetic type                  | * | * | * |
| 287 | 424  | acetolactate synthase small subunit                                     | TAO_1529 | NHAL_0656 | NOC_2519 | NWAT_0615 | acetolactate synthase small subunit                                    | * | * | * |
| 288 | 1050 | ketol-acid reductoisomerase                                             | TAO_1528 | NHAL_0657 | NOC_2518 | NWAT_0616 | ketol-acid reductoisomerase                                            | * | * | * |
| 289 | 778  | CDP-diacylglycerol/serine O-phosphatidyltransferase                     | TAO_1527 | NHAL_0658 | NOC_2517 | NWAT_0617 | CDP-diacylglycerol/serine O-phosphatidyltransferase                    | * | * | * |
| 290 | 1311 | 2-isopropylmalate synthase                                              | TAO_1526 | NHAL_0659 | NOC_2516 | NWAT_0618 | 2-isopropylmalate synthase                                             | * | * | * |
| 291 | 573  | phage SPO1 DNA polymerase-like protein                                  | TAO_1525 | NHAL_0660 | NOC_2515 | NWAT_0619 | phage SPO1 DNA polymerase-like protein                                 | * | * | * |
| 292 | 445  | ribosomal-protein-alanine acetyltransferase                             | TAO_1524 | NHAL_0661 | NOC_2514 | NWAT_0620 | ribosomal-protein-alanine acetyltransferase                            | * | * | * |
| 293 | 2118 | -                                                                       | -        | NHAL_0662 | NOC_2513 | NWAT_0621 | MgtC/SapB transporter                                                  | * |   |   |
| 294 | 1794 | -                                                                       | -        | NHAL_0663 | NOC_2512 | NWAT_0622 | NUDIX hydrolase                                                        | * |   |   |

|     |      |                                                                       |          |           |          |           |                                                                       |   |   |   |
|-----|------|-----------------------------------------------------------------------|----------|-----------|----------|-----------|-----------------------------------------------------------------------|---|---|---|
| 295 | 1948 | -                                                                     | -        | NHAL_0664 | NOC_2511 | NWAT_0623 | hypothetical protein                                                  | * |   |   |
| 296 | 2249 | -                                                                     | -        | NHAL_0667 | NOC_2509 | NWAT_0624 | putative serine protein kinase prkA                                   | * |   |   |
| 297 | 2115 | -                                                                     | -        | NHAL_0668 | NOC_2508 | NWAT_0625 | hypothetical protein                                                  | * |   |   |
| 298 | 2192 | -                                                                     | -        | NHAL_0669 | NOC_2507 | NWAT_0626 | stage V sporulation-like protein, spoVR                               | * |   |   |
| 299 | 2377 | -                                                                     | -        | NHAL_0670 | -        | NWAT_0627 | hypothetical protein                                                  | * |   |   |
| 300 | 2216 | -                                                                     | -        | NHAL_0671 | NOC_2506 | NWAT_0628 | multicopper oxidase, type 3                                           | * |   |   |
| 301 | 1970 | -                                                                     | -        | NHAL_0672 | NOC_2505 | NWAT_0629 | hypothetical protein                                                  | * |   |   |
| 302 | 691  | phosphoserine phosphatase SerB                                        | TAO_1523 | NHAL_0674 | NOC_2504 | NWAT_0630 | phosphoserine phosphatase SerB                                        | * | * | * |
| 303 | 964  | methane monooxygenase/ammonia monooxygenase subunit C                 | TAO_1522 | NHAL_0675 | NOC_2503 | NWAT_0631 | methane monooxygenase/ammonia monooxygenase subunit C                 | * | * | * |
| 304 | 829  | methane monooxygenase/ammonia monooxygenase subunit A                 | TAO_1521 | NHAL_0676 | NOC_2502 | NWAT_0632 | methane monooxygenase/ammonia monooxygenase subunit A                 | * | * | * |
| 305 | 1109 | methane monooxygenase/ammonia monooxygenase subunit B                 | TAO_1520 | NHAL_0677 | NOC_2501 | NWAT_0633 | methane monooxygenase/ammonia monooxygenase subunit B                 | * | * | * |
| 306 | 249  | hypothetical conserved protein                                        | TAO_1519 | NHAL_0678 | NOC_2500 | NWAT_0634 | hypothetical protein                                                  | * | * | * |
| 307 | 303  | hypothetical conserved protein                                        | TAO_1518 | NHAL_0679 | NOC_2499 | NWAT_0635 | hypothetical protein                                                  | * | * | * |
| 308 | 245  | hypothetical conserved protein                                        | TAO_1517 | NHAL_0680 | NOC_2498 | NWAT_0636 | hypothetical protein                                                  | * | * | * |
| 309 | 730  | indole-3-glycerol-phosphate synthase                                  | TAO_1516 | NHAL_0681 | NOC_2497 | NWAT_0637 | indole-3-glycerol phosphate synthase                                  | * | * | * |
| 310 | 923  | anthranilate phosphoribosyltransferase                                | TAO_1515 | NHAL_0682 | NOC_2496 | NWAT_0638 | anthranilate phosphoribosyltransferase                                | * | * | * |
| 311 | 614  | anthranilate synthase subunit II                                      | TAO_1514 | NHAL_0683 | NOC_2495 | NWAT_0639 | glutamine amidotransferase of anthranilate synthase                   | * | * | * |
| 312 | 1299 | anthranilate synthase subunit I                                       | TAO_1512 | NHAL_0684 | NOC_2494 | NWAT_0640 | anthranilate synthase component I                                     | * | * | * |
| 313 | 713  | phosphoglycolate phosphatase                                          | TAO_1511 | NHAL_0685 | NOC_2493 | NWAT_0641 | phosphoglycolate phosphatase                                          | * | * | * |
| 314 | 738  | ribulose-phosphate 3-epimerase                                        | TAO_1510 | NHAL_0686 | NOC_2492 | NWAT_0642 | ribulose-phosphate 3-epimerase                                        | * | * | * |
| 315 | 394  | iron sulfur cluster assemblytranscriptional regulator SufA            | TAO_1509 | NHAL_0687 | NOC_2491 | NWAT_0643 | iron sulfur cluster assemblytranscriptional regulator SufA            | * | * | * |
| 316 | 1331 | FeS assembly protein SufB                                             | TAO_1508 | NHAL_0688 | NOC_2490 | NWAT_0644 | FeS assembly protein SufB                                             | * | * | * |
| 317 | 803  | iron-sulfur cluster assembly ATPase protein SufC                      | TAO_1507 | NHAL_0689 | NOC_2489 | NWAT_0645 | FeS assembly ATPase SufC                                              | * | * | * |
| 318 | 1124 | FeS assembly protein SufD                                             | TAO_1506 | NHAL_0690 | NOC_2488 | NWAT_0646 | FeS assembly protein SufD                                             | * | * | * |
| 319 | 1189 | SufS subfamily cysteine desulfurase                                   | TAO_1505 | NHAL_0691 | NOC_2487 | NWAT_0647 | SufS subfamily cysteine desulfurase                                   | * | * | * |
| 320 | 400  | iron sulfur cluster assembly protein SufU                             | TAO_1504 | NHAL_0692 | NOC_2486 | NWAT_0648 | SUF system FeS assembly protein                                       | * | * | * |
| 321 | 560  | FeS assembly SUF system protein SufT                                  | TAO_1503 | NHAL_0693 | NOC_2485 | NWAT_0649 | FeS assembly SUF system protein SufT                                  | * | * | * |
| 322 | 1782 | -                                                                     | -        | NHAL_0694 | NOC_2484 | NWAT_0650 | transcriptional activator RfaH                                        | * |   |   |
| 323 | 1249 | mannose-1-phosphate guanylyltransferase/mannose-6-phosphate isomerase | TAO_1502 | NHAL_0695 | NOC_2483 | NWAT_0651 | mannose-1-phosphate guanylyltransferase/mannose-6-phosphate isomerase | * | * | * |
| 324 | 645  | adenylylsulfate kinase                                                | TAO_1501 | NHAL_0696 | NOC_2482 | NWAT_0652 | adenylylsulfate kinase                                                | * | * | * |
| 325 | 2179 | -                                                                     | -        | NHAL_0698 | NOC_2481 | NWAT_0653 | polysaccharide biosynthesis protein                                   | * |   |   |
| 326 | 2018 | -                                                                     | -        | NHAL_0699 | NOC_2480 | NWAT_0654 | group 1 glycosyl transferase                                          | * |   |   |
| 327 | 2043 | -                                                                     | -        | NHAL_0700 | NOC_2479 | NWAT_0655 | group 1 glycosyl transferase                                          | * |   |   |
| 328 | 2247 | -                                                                     | -        | NHAL_0701 | NOC_2478 | NWAT_0656 | asparagine synthase                                                   | * |   |   |
| 329 | 1999 | -                                                                     | -        | NHAL_0702 | NOC_2477 | NWAT_0657 | group 1 glycosyl transferase                                          | * |   |   |
| 330 | 743  | glycosyl transferase family protein                                   | TAO_1499 | NHAL_0703 | NOC_2476 | NWAT_0658 | glycosyl transferase family protein                                   | * | * | * |
| 331 | 194  | histone family protein DNA-binding protein                            | TAO_1497 | NHAL_0704 | NOC_2475 | NWAT_0659 | histone family protein DNA-binding protein                            | * | * | * |
| 332 | 904  | glycine cleavage system protein T                                     | TAO_1496 | NHAL_0705 | NOC_2474 | NWAT_0660 | glycine cleavage T protein (aminomethyl transferase)                  | * | * | * |
| 333 | 272  | succinate dehydrogenase cytochrome b556 subunit                       | TAO_1495 | NHAL_0706 | NOC_2473 | NWAT_0661 | succinate dehydrogenase cytochrome b556 subunit                       | * | * | * |
| 334 | 268  | succinate dehydrogenase, hydrophobic membrane anchor protein          | TAO_1494 | NHAL_0707 | NOC_2472 | NWAT_0662 | succinate dehydrogenase hydrophobic membrane anchor protein           | * | * | * |
| 335 | 1383 | succinate dehydrogenase/fumarate reductase, flavoprotein subunit      | TAO_1493 | NHAL_0708 | NOC_2471 | NWAT_0663 | succinate dehydrogenase or fumarate reductase, flavoprotein subunit   | * | * | * |
| 336 | 849  | succinate dehydrogenase/fumarate reductase iron-sulfur protein        | TAO_1492 | NHAL_0709 | NOC_2470 | NWAT_0664 | succinate dehydrogenase and fumarate reductase iron-sulfur protein    | * | * | * |
| 337 | 188  | hypothetical conserved protein                                        | TAO_1491 | NHAL_0710 | NOC_2469 | NWAT_0665 | hypothetical protein                                                  | * | * | * |
| 338 | 259  | hypothetical conserved protein                                        | TAO_1490 | NHAL_0711 | NOC_2468 | NWAT_0666 | hypothetical protein                                                  | * | * | * |
| 339 | 1322 | L-aspartate oxidase                                                   | TAO_1489 | NHAL_0712 | NOC_2467 | NWAT_0667 | L-aspartate oxidase                                                   | * | * | * |
| 340 | 586  | RNA polymerase sigma factor RpoE                                      | TAO_1488 | NHAL_0713 | NOC_2466 | NWAT_0668 | RNA polymerase sigma factor RpoE                                      | * | * | * |
| 341 | 352  | anti sigma-E protein RseA family protein                              | TAO_1487 | NHAL_0714 | NOC_2465 | NWAT_0669 | anti sigma-E protein RseA family protein                              | * | * | * |
| 342 | 786  | sigma E regulatory protein MucB/RseB                                  | TAO_1486 | NHAL_0715 | NOC_2464 | NWAT_0670 | sigma E regulatory protein MucB/RseB                                  | * | * | * |
| 343 | 256  | positive regulator of sigma E, RseC/MucC                              | TAO_1485 | NHAL_0716 | NOC_2463 | NWAT_0671 | positive regulator of sigma(E) RseC/MucC                              | * | * | * |

|     |      |                                                                  |          |              |          |           |                                                                  |   |   |   |
|-----|------|------------------------------------------------------------------|----------|--------------|----------|-----------|------------------------------------------------------------------|---|---|---|
| 344 | 1207 | protease Do                                                      | TAO_1484 | NHAL_0717    | NOC_2462 | NWAT_0672 | protease Do                                                      | * | * | * |
| 345 | 1382 | GTP-binding protein LepA                                         | TAO_1483 | NHAL_0718    | NOC_2461 | NWAT_0673 | GTP-binding protein LepA                                         | * | * | * |
| 346 | 852  | signal peptidase I                                               | TAO_1482 | NHAL_0719    | NOC_2460 | NWAT_0674 | signal peptidase I                                               | * | * | * |
| 347 | 1653 | -                                                                | -        | NHAL_0720    | NOC_2459 | NWAT_0675 | hypothetical protein                                             | * |   |   |
| 348 | 604  | ribonuclease III                                                 | TAO_1481 | NHAL_0721    | NOC_2458 | NWAT_0676 | ribonuclease III                                                 | * | * | * |
| 349 | 910  | GTP-binding protein Era                                          | TAO_1480 | NHAL_0722    | NOC_2457 | NWAT_0677 | GTP-binding protein Era                                          | * | * | * |
| 350 | 1936 | -                                                                | -        | NHAL_0723    | NOC_2456 | NWAT_0678 | metal-dependent hydrolase HDOD                                   | * |   |   |
| 351 | 1235 | aminotransferase                                                 | TAO_1479 | NHAL_0724    | NOC_2455 | NWAT_0679 | class I/II aminotransferase                                      | * | * | * |
| 352 | 1193 | homoserine dehydrogenase                                         | TAO_1478 | NHAL_0725    | NOC_2454 | NWAT_0680 | homoserine dehydrogenase                                         | * | * | * |
| 353 | 1108 | threonine synthase                                               | TAO_1477 | NHAL_0726    | NOC_2453 | NWAT_0681 | threonine synthase                                               | * | * | * |
| 354 | 2121 | -                                                                | -        | NHAL_0727    | NOC_2452 | NWAT_0682 | multi-sensor signal transduction histidine kinase                | * |   |   |
| 355 | 1758 | -                                                                | -        | NHAL_0728    | NOC_2451 | NWAT_0683 | response regulator receiver protein                              | * |   |   |
| 356 | 1859 | -                                                                | -        | NHAL_0729    | NOC_2450 | NWAT_0684 | PAS/PAC sensor signal transduction histidine kinase              | * |   |   |
| 357 | 952  | nitrilase/cyanide hydratase and apolipoprotein N-acyltransferase | TAO_1476 | NHAL_0730    | NOC_2448 | NWAT_0685 | nitrilase/cyanide hydratase and apolipoprotein N-acyltransferase | * | * | * |
| 358 | 1015 | agmatine deiminase                                               | TAO_1475 | NHAL_0731    | NOC_2447 | NWAT_0686 | agmatine deiminase                                               | * | * | * |
| 359 | 2169 | -                                                                | -        | NHAL_0732    | NOC_2446 | NWAT_0687 | anion transporter                                                | * |   |   |
| 360 | 1811 | -                                                                | -        | NHAL_0735    | NOC_2445 | NWAT_0688 | LuxR family two component transcriptional regulator              | * |   |   |
| 361 | 1107 | oxygen-independent coproporphyrinogen III oxidase                | TAO_1474 | NHAL_0737    | NOC_2444 | NWAT_0689 | oxygen-independent coproporphyrinogen III oxidase                | * | * | * |
| 362 | 516  | non-canonical purine NTP pyrophosphatase                         | TAO_1473 | NHAL_0738    | NOC_2443 | NWAT_0690 | RdgB/HAM1 family non-canonical purine NTP pyrophosphatase        | * | * | * |
| 363 | 726  | ribonuclease PH                                                  | TAO_1472 | NHAL_0739    | NOC_2442 | NWAT_0691 | ribonuclease PH                                                  | * | * | * |
| 364 | 1598 | -                                                                | -        | NHAL_0740    | NOC_2441 | NWAT_0692 | hypothetical protein                                             | * |   |   |
| 365 | 225  | 2,3-diketo-5-methylthio-1-phosphopentane phosphatase             | TAO_1469 | NHAL_0743    | NOC_2439 | NWAT_0696 | 2,3-diketo-5-methylthio-1-phosphopentane phosphatase             | * | * | * |
| 366 | 1821 | -                                                                | -        | NHAL_2244    | NOC_2438 | NWAT_0698 | sigma 54 modulation protein/ribosomal protein S30EA              | * |   |   |
| 367 | 241  | hypothetical conserved protein                                   | TAO_0611 | NHAL_2248    | NOC_2437 | NWAT_0699 | hypothetical protein                                             | * | * | * |
| 368 | 658  | peptidase M23B                                                   | TAO_0612 | NHAL_2251    | NOC_2436 | NWAT_0700 | peptidase M23B                                                   | * | * | * |
| 369 | 305  | hypothetical conserved protein                                   | TAO_0587 | NHAL_2252    | NOC_2435 | NWAT_0701 | hypothetical protein                                             | * | * | * |
| 370 | 508  | hypothetical conserved protein                                   | TAO_0591 | NHAL_2259    | NOC_2433 | NWAT_0703 | hypothetical protein                                             | * | * | * |
| 371 | 881  | aminoglycoside phosphotransferase                                | TAO_1551 | NHAL_2268    | NOC_2432 | NWAT_0705 | aminoglycoside phosphotransferase                                | * | * | * |
| 372 | 621  | nucleotidyl transferase                                          | TAO_1550 | NHAL_2269    | NOC_2431 | NWAT_0706 | nucleotidyl transferase                                          | * | * | * |
| 373 | 937  | ornithine carbamoyltransferase                                   | TAO_1549 | NHAL_2270    | NOC_2430 | NWAT_0707 | ornithine carbamoyltransferase                                   | * | * | * |
| 374 | 1157 | acetylornithine aminotransferase                                 | TAO_1548 | NHAL_2271(2) | NOC_2429 | NWAT_0708 | acetylornithine and succinylornithine aminotransferase           | * | * | * |
| 375 | 656  | superoxide dismutase                                             | TAO_1547 | NHAL_2272    | NOC_2428 | NWAT_0709 | superoxide dismutase                                             | * | * | * |
| 376 | 299  | glutaredoxin-like protein                                        | TAO_1546 | NHAL_2273    | NOC_2427 | NWAT_0710 | glutaredoxin-like protein                                        | * | * | * |
| 377 | 300  | ATP-dependent Clp protease adaptor protein ClpS                  | TAO_1545 | NHAL_2274    | NOC_2426 | NWAT_0711 | ATP-dependent Clp protease adaptor protein ClpS                  | * | * | * |
| 378 | 1421 | ATP-dependent Clp protease ATP-binding subunit clpA              | TAO_1544 | NHAL_2275    | NOC_2425 | NWAT_0712 | ATP-dependent Clp protease ATP-binding subunit ClpA              | * | * | * |
| 379 | 495  | ferric uptake regulator, Fur family                              | TAO_1543 | NHAL_2276    | NOC_2424 | NWAT_0713 | ferric uptake regulator, Fur family                              | * | * | * |
| 380 | 757  | ABC transporter substrate-binding protein                        | TAO_1542 | NHAL_2277    | NOC_2423 | NWAT_0714 | periplasmic solute binding protein                               | * | * | * |
| 381 | 735  | metal ABC transporter, ATP-binding protein                       | TAO_1541 | NHAL_2278    | NOC_2422 | NWAT_0715 | ABC transporter protein                                          | * | * | * |
| 382 | 902  | ABC Mn2+/Zn2+ transporter,inner membrane subunit                 | TAO_1540 | NHAL_2279    | NOC_2421 | NWAT_0716 | ABC Mn2+/Zn2+ transporter,inner membrane subunit                 | * | * | * |
| 383 | 491  | ADP-ribose diphosphatase NudeE                                   | TAO_0613 | NHAL_2282    | NOC_2420 | NWAT_0720 | ADP-ribose diphosphatase NudeE                                   | * | * | * |
| 384 | 716  | 3'(2'),5'-bisphosphate nucleotidase                              | TAO_0614 | NHAL_2283    | NOC_2419 | NWAT_0721 | 3'(2'),5'-bisphosphate nucleotidase                              | * | * | * |
| 385 | 53   | phosphate-selective porin O and P                                | TAO_0616 | NHAL_2285    | NOC_2417 | NWAT_0723 | phosphate-selective porin O and P                                | * | * |   |
| 386 | 1894 | -                                                                | -        | NHAL_2287    | NOC_2401 | NWAT_0724 | phosphate regulon transcriptional regulatory protein phoB        | * |   |   |
| 387 | 2123 | -                                                                | -        | NHAL_2288    | NOC_2400 | NWAT_0725 | signal transduction histidine kinase, phoR                       | * |   |   |
| 388 | 917  | phosphate binding protein                                        | TAO_0617 | NHAL_2289    | NOC_2399 | NWAT_0726 | phosphate-binding protein                                        | * | * | * |
| 389 | 1393 | phosphate ABC transporter permease                               | TAO_0618 | NHAL_2290    | NOC_2398 | NWAT_0727 | binding-protein-dependent transporters inner membrane component  | * | * | * |
| 390 | 1315 | phosphate ABC transporter permease                               | TAO_0619 | NHAL_2291    | NOC_2397 | NWAT_0728 | phosphate ABC transporter permease                               | * | * | * |
| 391 | 866  | phosphate ABC transporter ATPase                                 | TAO_0620 | NHAL_2292    | NOC_2396 | NWAT_0729 | phosphate ABC transporter ATPase                                 | * | * | * |
| 392 | 678  | phosphate transporter regulatory protein phoU                    | TAO_0621 | NHAL_2293    | NOC_2395 | NWAT_0730 | phosphate transporter regulatory protein phoU                    | * | * | * |



|     |      |                                                                                   |          |           |          |           |                                                                            |   |   |   |
|-----|------|-----------------------------------------------------------------------------------|----------|-----------|----------|-----------|----------------------------------------------------------------------------|---|---|---|
| 393 | 2174 | -                                                                                 | -        | NHAL_2294 | NOC_2394 | NWAT_0731 | guanosine-5'-triphosphate,3'-diphosphate diphosphatase                     | * |   |   |
| 394 | 1962 | -                                                                                 | -        | NHAL_2295 | NOC_2393 | NWAT_0732 | adenylate cyclase                                                          | * |   |   |
| 395 | 2257 | -                                                                                 | -        | NHAL_2311 | NOC_2388 | NWAT_2234 | polyphosphate kinase                                                       | * |   |   |
| 396 | 215  | <b>BolA family protein</b>                                                        | TAO_0622 | NHAL_2312 | NOC_2387 | NWAT_2233 | BolA family protein                                                        | * | * | * |
| 397 | 277  | <b>hypothetical conserved protein</b>                                             | TAO_0623 | NHAL_2313 | NOC_2386 | NWAT_2232 | YCII-like protein                                                          | * | * | * |
| 398 | 675  | <b>intracellular septation protein A</b>                                          | TAO_0624 | NHAL_2314 | NOC_2385 | NWAT_2231 | intracellular septation protein A                                          | * | * | * |
| 399 | 785  | <b>PHP domain-containing protein</b>                                              | TAO_0625 | NHAL_2315 | NOC_2384 | NWAT_2230 | PHP domain-containing protein                                              | * | * | * |
| 400 | 628  | <b>translation factor, Sua5/YciO/YrdC/YwIC</b>                                    | TAO_0626 | NHAL_2316 | NOC_2383 | NWAT_2229 | Sua5/YciO/YrdC/YwIC family protein                                         | * | * | * |
| 401 | 685  | <b>phospholipid/glycerol acyltransferase</b>                                      | TAO_0627 | NHAL_2317 | NOC_2382 | NWAT_2228 | phospholipid/glycerol acyltransferase                                      | * | * | * |
| 402 | 1440 | <b>ATP-dependent chaperone ClpB</b>                                               | TAO_0628 | NHAL_2318 | NOC_2381 | NWAT_2227 | ATP-dependent chaperone ClpB                                               | * | * | * |
| 403 | 1370 | <b>AMP-dependent synthetase and ligase</b>                                        | TAO_0629 | NHAL_2321 | NOC_2380 | NWAT_2226 | AMP-dependent synthetase and ligase                                        | * | * | * |
| 404 | 338  | <b>invasion gene expression up-regulator sirB</b>                                 | TAO_0630 | NHAL_2322 | NOC_2379 | NWAT_2225 | invasion gene expression up-regulator, sirB                                | * | * | * |
| 405 | 1652 | -                                                                                 | -        | NHAL_2324 | NOC_2378 | NWAT_2224 | flagellar basal-body rod protein FlgB                                      | * |   |   |
| 406 | 1684 | -                                                                                 | -        | NHAL_2325 | NOC_2377 | NWAT_2223 | flagellar basal body rod protein FlgC                                      | * |   |   |
| 407 | 1842 | -                                                                                 | -        | NHAL_2326 | NOC_2376 | NWAT_2222 | flagellar hook capping protein                                             | * |   |   |
| 408 | 2054 | -                                                                                 | -        | NHAL_2327 | NOC_2375 | NWAT_2221 | flagellar basal body flaE domain-containing protein                        | * |   |   |
| 409 | 1870 | -                                                                                 | -        | NHAL_2328 | NOC_2374 | NWAT_2220 | flagellar basal-body rod protein FlgF                                      | * |   |   |
| 410 | 1914 | -                                                                                 | -        | NHAL_2329 | NOC_2373 | NWAT_2219 | flagellar basal-body rod protein FlgG                                      | * |   |   |
| 411 | 1848 | -                                                                                 | -        | NHAL_2330 | NOC_2372 | NWAT_2218 | flagellar l-ring protein                                                   | * |   |   |
| 412 | 2028 | -                                                                                 | -        | NHAL_2331 | NOC_2371 | NWAT_2217 | flagellar basal body P-ring biosynthesis protein FlgA                      | * |   |   |
| 413 | 1857 | -                                                                                 | -        | NHAL_2332 | NOC_2370 | NWAT_2216 | flagellar rod assembly protein/muramidase FlgJ                             | * |   |   |
| 414 | 2183 | -                                                                                 | -        | NHAL_2333 | NOC_2369 | NWAT_2215 | flagellar hook-associated protein FlgK                                     | * |   |   |
| 415 | 2012 | -                                                                                 | -        | NHAL_2334 | NOC_2368 | NWAT_2214 | flagellar hook-associated protein 3                                        | * |   |   |
| 416 | 1864 | -                                                                                 | -        | NHAL_2336 | NOC_2367 | NWAT_2213 | flagellin domain-containing protein                                        | * |   |   |
| 417 | 1612 | -                                                                                 | -        | NHAL_2337 | NOC_2366 | NWAT_2212 | flagellar protein flaG protein                                             | * |   |   |
| 418 | 2184 | -                                                                                 | -        | NHAL_2338 | NOC_2365 | NWAT_2211 | flagellar hook-associated 2 domain-containing protein                      | * |   |   |
| 419 | 1645 | -                                                                                 | -        | NHAL_2339 | NOC_2364 | NWAT_2210 | flagellar protein FliS                                                     | * |   |   |
| 420 | 1594 | -                                                                                 | -        | NHAL_2340 | NOC_2363 | NWAT_2209 | hypothetical protein                                                       | * |   |   |
| 421 | 1213 | <b>sigma-54 dependent transcriptional regulator</b>                               | TAO_0631 | NHAL_2342 | NOC_2362 | NWAT_2208 | Fis family sigma-54 transcriptional regulator                              | * | * | * |
| 422 | 1965 | -                                                                                 | -        | NHAL_2343 | NOC_2361 | NWAT_2207 | Fis family two component sigma54 specific transcriptional regulator        | * |   |   |
| 423 | 1591 | -                                                                                 | -        | NHAL_2344 | NOC_2360 | NWAT_2206 | flagellar hook-basal body complex subunit FliE                             | * |   |   |
| 424 | 2154 | -                                                                                 | -        | NHAL_2345 | NOC_2359 | NWAT_2205 | flagellar M-ring protein FliF                                              | * |   |   |
| 425 | 1979 | -                                                                                 | -        | NHAL_2346 | NOC_2358 | NWAT_2204 | flagellar motor switch protein FliG                                        | * |   |   |
| 426 | 1826 | -                                                                                 | -        | NHAL_2347 | NOC_2357 | NWAT_2203 | flagellar assembly protein fliH/type III secretion system HrpE             | * |   |   |
| 427 | 2144 | -                                                                                 | -        | NHAL_2348 | NOC_2356 | NWAT_2202 | flagellar biosynthesis/type III secretory pathway ATPase, FliI/YscN        | * |   |   |
| 428 | 1685 | -                                                                                 | -        | NHAL_2349 | NOC_2355 | NWAT_2201 | flagellar biosynthesis chaperone FliJ-like protein                         | * |   |   |
| 429 | 1839 | -                                                                                 | -        | NHAL_2350 | NOC_2354 | NWAT_2200 | flagellar hook-length control protein                                      | * |   |   |
| 430 | 580  | <b>orotidine 5'-phosphate decarboxylase</b>                                       | TAO_0632 | NHAL_2351 | NOC_2353 | NWAT_2199 | orotidine 5'-phosphate decarboxylase                                       | * | * | * |
| 431 | 1126 | <b>queuine tRNA-ribosyltransferase</b>                                            | TAO_0633 | NHAL_2357 | NOC_2352 | NWAT_2198 | queuine tRNA-ribosyltransferase                                            | * | * | * |
| 432 | 291  | <b>preprotein translocase subunit YajC</b>                                        | TAO_0634 | NHAL_2358 | NOC_2351 | NWAT_2197 | preprotein translocase subunit YajC                                        | * | * | * |
| 433 | 1345 | <b>protein-export membrane protein SecD</b>                                       | TAO_0635 | NHAL_2359 | NOC_2350 | NWAT_2196 | protein-export membrane protein SecD                                       | * | * | * |
| 434 | 733  | <b>preprotein translocase subunit SecF</b>                                        | TAO_0112 | NHAL_2360 | NOC_2349 | NWAT_2195 | protein-export membrane protein SecF                                       | * | * | * |
| 435 | 144  | <b>hypothetical conserved protein (divided, N-term side)</b>                      | TAO_0636 | NHAL_2361 | NOC_2348 | NWAT_2194 | hypothetical protein                                                       | * | * | * |
| 436 | 1194 | <b>UDP-N-acetylmuramate L-alanyl-gamma-D-glutamyl-meso-diaminopimelate ligase</b> | TAO_0637 | NHAL_2362 | NOC_2347 | NWAT_2193 | UDP-N-acetylmuramate L-alanyl-gamma-D-glutamyl-meso-diaminopimelate ligase | * | * | * |
| 437 | 662  | <b>aromatic acid decarboxylase</b>                                                | TAO_0638 | NHAL_2363 | NOC_2346 | NWAT_2192 | 3-octaprenyl-4-hydroxybenzoate carboxy-lyase                               | * | * | * |
| 438 | 1349 | <b>2-polyprenylphenol 6-hydroxylase UbiB</b>                                      | TAO_0639 | NHAL_2364 | NOC_2345 | NWAT_2191 | 2-polyprenylphenol 6-hydroxylase                                           | * | * | * |
| 439 | 361  | <b>sterol-binding domain-containing protein</b>                                   | TAO_0640 | NHAL_2365 | NOC_2344 | NWAT_2190 | sterol-binding domain-containing protein                                   | * | * | * |
| 440 | 800  | <b>ubiquinone/menaquinone biosynthesis methyltransferase</b>                      | TAO_0641 | NHAL_2366 | NOC_2343 | NWAT_2189 | ubiquinone/menaquinone biosynthesis methyltransferase                      | * | * | * |
| 441 | 353  | <b>hypothetical conserved protein</b>                                             | TAO_0642 | NHAL_2367 | NOC_2342 | NWAT_2188 | hypothetical protein                                                       | * | * | * |

|     |      |                                                       |          |           |          |                        |                                                       |   |   |   |
|-----|------|-------------------------------------------------------|----------|-----------|----------|------------------------|-------------------------------------------------------|---|---|---|
| 442 | 1231 | ATP-dependent protease ATP-binding subunit HslU       | TAO_0643 | NHAL_2368 | NOC_2341 | NWAT_2187              | heat shock protein HslVU, ATPase subunit HslU         | * | * | * |
| 443 | 539  | 20S proteasome A and B subunits                       | TAO_0644 | NHAL_2369 | NOC_2340 | NWAT_2186              | 20S proteasome A and B subunits                       | * | * | * |
| 444 | 2019 | -                                                     | -        | NHAL_2370 | NOC_2339 | NWAT_2185              | <b>UDP-glucose 4-epimerase</b>                        | * |   |   |
| 445 | 82   | preprotein translocase subunit SecE                   | TAO_0646 | NHAL_2372 | NOC_2337 | NWAT_2171<br>NWAT_2183 | preprotein translocase subunit SecE                   | * | * |   |
| 446 | 93   | transcription termination/antitermination factor NusG | TAO_0647 | NHAL_2373 | NOC_2336 | NWAT_2170<br>NWAT_2182 | transcription termination/antitermination factor NusG | * | * |   |
| 447 | 85   | 50S ribosomal protein L11                             | TAO_0648 | NHAL_2374 | NOC_2335 | NWAT_2169<br>NWAT_2181 | 50S ribosomal protein L11                             | * | * |   |
| 448 | 95   | 50S ribosomal protein L1                              | TAO_0649 | NHAL_2375 | NOC_2334 | NWAT_2168<br>NWAT_2180 | 50S ribosomal protein L1                              | * | * |   |
| 449 | 88   | 50S ribosomal protein L10                             | TAO_0650 | NHAL_2376 | NOC_2333 | NWAT_2167<br>NWAT_2179 | 50S ribosomal protein L10                             | * | * |   |
| 450 | 81   | 50S ribosomal protein L7/L12                          | TAO_0651 | NHAL_2377 | NOC_2332 | NWAT_2166<br>NWAT_2178 | 50S ribosomal protein L7/L12                          | * | * |   |
| 451 | 101  | DNA-directed RNA polymerase subunit beta              | TAO_0652 | NHAL_2378 | NOC_2331 | NWAT_2165<br>NWAT_2177 | DNA-directed RNA polymerase subunit beta              | * | * |   |
| 452 | 102  | DNA-directed RNA polymerase subunit beta'             | TAO_0653 | NHAL_2379 | NOC_2330 | NWAT_2164<br>NWAT_2176 | DNA-directed RNA polymerase subunit beta'             | * | * |   |
| 453 | 84   | 30S ribosomal protein S12                             | TAO_0654 | NHAL_2380 | NOC_2329 | NWAT_2163<br>NWAT_2175 | 30S ribosomal protein S12                             | * | * |   |
| 454 | 91   | 30S ribosomal protein S7                              | TAO_0655 | NHAL_2381 | NOC_2328 | NWAT_2162<br>NWAT_2174 | 30S ribosomal protein S7                              | * | * |   |
| 455 | 100  | translation elongation factor G                       | TAO_0656 | NHAL_2382 | NOC_2327 | NWAT_2161<br>NWAT_2173 | translation elongation factor G                       | * | * |   |
| 456 | 306  | 30S ribosomal protein S10                             | TAO_0658 | NHAL_2384 | NOC_2325 | NWAT_2159              | 30S ribosomal protein S10                             | * | * | * |
| 457 | 540  | 50S ribosomal protein L3                              | TAO_0659 | NHAL_2385 | NOC_2324 | NWAT_2158              | 50S ribosomal protein L3                              | * | * | * |
| 458 | 517  | 50S ribosomal protein L4/L1e                          | TAO_0660 | NHAL_2386 | NOC_2323 | NWAT_2157              | 50S ribosomal protein L4/L1e                          | * | * | * |
| 459 | 244  | 50S ribosomal protein L23                             | TAO_0661 | NHAL_2387 | NOC_2322 | NWAT_2156              | 50S ribosomal protein L25/L23                         | * | * | * |
| 460 | 768  | 50S ribosomal protein L2                              | TAO_0662 | NHAL_2388 | NOC_2321 | NWAT_2155              | 50S ribosomal protein L2                              | * | * | * |
| 461 | 252  | 30S ribosomal protein S19                             | TAO_0663 | NHAL_2389 | NOC_2320 | NWAT_2154              | 30S ribosomal protein S19                             | * | * | * |
| 462 | 257  | 50S ribosomal protein L22                             | TAO_0664 | NHAL_2390 | NOC_2319 | NWAT_2153              | 50S ribosomal protein L22                             | * | * | * |
| 463 | 720  | 30S ribosomal protein S3                              | TAO_0665 | NHAL_2391 | NOC_2318 | NWAT_2152              | 30S ribosomal protein S3                              | * | * | * |
| 464 | 441  | 50S ribosomal protein L16                             | TAO_0666 | NHAL_2392 | NOC_2317 | NWAT_2151              | 50S ribosomal protein L16                             | * | * | * |
| 465 | 141  | 50S ribosomal protein L29                             | TAO_0667 | NHAL_2393 | NOC_2316 | NWAT_2150              | 50S ribosomal protein L29                             | * | * | * |
| 466 | 213  | 30S ribosomal protein S17                             | TAO_0668 | NHAL_2394 | NOC_2315 | NWAT_2149              | 30S ribosomal protein S17                             | * | * | * |
| 467 | 355  | 50S ribosomal protein L14                             | TAO_0669 | NHAL_2395 | NOC_2314 | NWAT_2148              | 50S ribosomal protein L14                             | * | * | * |
| 468 | 261  | 50S ribosomal protein L24                             | TAO_0670 | NHAL_2396 | NOC_2313 | NWAT_2147              | 50S ribosomal protein L24                             | * | * | * |
| 469 | 564  | 50S ribosomal protein L5                              | TAO_0671 | NHAL_2397 | NOC_2312 | NWAT_2146              | 50S ribosomal protein L5                              | * | * | * |
| 470 | 251  | 30S ribosomal protein S14                             | TAO_0672 | NHAL_2398 | NOC_2311 | NWAT_2145              | 30S ribosomal protein S14                             | * | * | * |
| 471 | 276  | 30S ribosomal protein S8                              | TAO_0673 | NHAL_2399 | NOC_2310 | NWAT_2144              | 30S ribosomal protein S8                              | * | * | * |
| 472 | 433  | 50S ribosomal protein L6                              | TAO_0674 | NHAL_2400 | NOC_2309 | NWAT_2143              | 50S ribosomal protein L6                              | * | * | * |
| 473 | 270  | 50S ribosomal protein L18                             | TAO_0675 | NHAL_2401 | NOC_2308 | NWAT_2142              | 50S ribosomal protein L18                             | * | * | * |
| 474 | 483  | 30S ribosomal protein S5                              | TAO_0676 | NHAL_2402 | NOC_2307 | NWAT_2141              | 30S ribosomal protein S5                              | * | * | * |
| 475 | 1532 | 50S ribosomal protein L30                             | TAO_0677 | NHAL_2403 |          | NWAT_2140              | 50S ribosomal protein L30                             | * |   |   |
| 476 | 332  | 50S ribosomal protein L15                             | TAO_0678 | NHAL_2404 | NOC_2306 | NWAT_2139              | 50S ribosomal protein L15                             | * | * | * |
| 477 | 1283 | preprotein translocase subunit SecY                   | TAO_0679 | NHAL_2405 | NOC_2305 | NWAT_2138              | preprotein translocase subunit SecY                   | * | * | * |
| 478 | 1486 | -                                                     | -        | NHAL_2406 | NOC_2304 | NWAT_2137              | <b>50S ribosomal protein L36</b>                      | * |   |   |
| 479 | 327  | 30S ribosomal protein S13                             | TAO_0680 | NHAL_2407 | NOC_2303 | NWAT_2136              | 30S ribosomal protein S13                             | * | * | * |
| 480 | 369  | 30S ribosomal protein S11                             | TAO_0681 | NHAL_2408 | NOC_2302 | NWAT_2135              | 30S ribosomal protein S11                             | * | * | * |
| 481 | 677  | 30S ribosomal protein S4                              | TAO_0682 | NHAL_2409 | NOC_2301 | NWAT_2134              | 30S ribosomal protein S4                              | * | * | * |
| 482 | 954  | DNA-directed RNA polymerase subunit alpha             | TAO_0683 | NHAL_2410 | NOC_2300 | NWAT_2133              | DNA-directed RNA polymerase subunit alpha             | * | * | * |
| 483 | 340  | 50S ribosomal protein L17                             | TAO_0684 | NHAL_2411 | NOC_2299 | NWAT_2132              | 50S ribosomal protein L17                             | * | * | * |
| 484 | 1884 | -                                                     | -        | NHAL_2412 | NOC_2298 | NWAT_2131              | <b>hypothetical protein</b>                           | * |   |   |

|     |      |                                                                        |          |           |          |           |                                                                        |   |   |   |
|-----|------|------------------------------------------------------------------------|----------|-----------|----------|-----------|------------------------------------------------------------------------|---|---|---|
| 485 | 739  | ubiquinone biosynthesis O-methyltransferase                            | TAO_0685 | NHAL_2413 | NOC_2296 | NWAT_2129 | ubiquinone biosynthesis O-methyltransferase                            | * | * | * |
| 486 | 1203 | N-ethylammelline chlorohydrolase                                       | TAO_0686 | NHAL_2414 | NOC_2295 | NWAT_2128 | N-ethylammelline chlorohydrolase                                       | * | * | * |
| 487 | 1805 | -                                                                      | -        | NHAL_2415 | NOC_2294 | NWAT_2127 | hypothetical protein                                                   | * | * | * |
| 488 | 966  | methylthioribose-1-phosphate isomerase                                 | TAO_0687 | NHAL_2416 | NOC_2293 | NWAT_2126 | translation initiation factor, aIF-2BI family                          | * | * | * |
| 489 | 944  | cysB family transcriptional regulator                                  | TAO_0688 | NHAL_2417 | NOC_2292 | NWAT_2125 | cysB family transcriptional regulator                                  | * | * | * |
| 490 | 805  | hypothetical conserved protein                                         | TAO_0689 | NHAL_2418 | NOC_2291 | NWAT_2124 | hypothetical protein                                                   | * | * | * |
| 491 | 790  | phosphoadenosine phosphosulfate reductase                              | TAO_0690 | NHAL_2419 | NOC_2290 | NWAT_2123 | thioredoxin dependent adenylsulfate reductase                          | * | * | * |
| 492 | 989  | sulfate adenyltransferase subunit 2                                    | TAO_0691 | NHAL_2420 | NOC_2289 | NWAT_2122 | sulfate adenyltransferase subunit 2                                    | * | * | * |
| 493 | 1238 | sulfate adenyltransferase, large subunit                               | TAO_0692 | NHAL_2421 | NOC_2288 | NWAT_2121 | sulfate adenyltransferase, large subunit                               | * | * | * |
| 494 | 2040 | -                                                                      | -        | NHAL_2422 | NOC_2287 | NWAT_2119 | hypothetical protein                                                   | * | * | * |
| 495 | 2161 | -                                                                      | -        | NHAL_2423 | NOC_2286 | NWAT_2118 | hypothetical protein                                                   | * | * | * |
| 496 | 1702 | -                                                                      | -        | NHAL_2424 | NOC_2285 | NWAT_2117 | camphor resistance crcB protein                                        | * | * | * |
| 497 | 1657 | -                                                                      | -        | NHAL_2425 | NOC_2284 | NWAT_2116 | hypothetical protein                                                   | * | * | * |
| 498 | 2238 | -                                                                      | -        | NHAL_2426 | NOC_2283 | NWAT_2115 | DNA topoisomerase IV subunit B                                         | * | * | * |
| 499 | 2256 | -                                                                      | -        | NHAL_2427 | NOC_2282 | NWAT_2114 | DNA topoisomerase IV subunit A                                         | * | * | * |
| 500 | 1364 | polysaccharide biosynthesis protein capD                               | TAO_0694 | NHAL_2428 | NOC_2281 | NWAT_2113 | polysaccharide biosynthesis protein capD                               | * | * | * |
| 501 | 783  | stationary-phase survival protein surE                                 | TAO_0696 | NHAL_2432 | NOC_0789 | NWAT_2322 | stationary phase survival protein surE                                 | * | * | * |
| 502 | 590  | protein-L-isoaspartate O-methyltransferase                             | TAO_0697 | NHAL_2433 | NOC_0790 | NWAT_2321 | protein-L-isoaspartate O-methyltransferase                             | * | * | * |
| 503 | 1856 | -                                                                      | -        | NHAL_2434 | NOC_0791 | NWAT_2320 | hypothetical protein                                                   | * | * | * |
| 504 | 520  | peptidase M23                                                          | TAO_0698 | NHAL_2435 | NOC_0792 | NWAT_2319 | peptidase M23                                                          | * | * | * |
| 505 | 999  | peptide chain release factor 2                                         | TAO_0699 | NHAL_2436 | NOC_0793 | NWAT_2318 | peptide chain release factor 2                                         | * | * | * |
| 506 | 2845 | lysyl-tRNA synthetase                                                  | TAO_0700 | NHAL_2437 |          |           | lysyl-tRNA synthetase                                                  | * | * | * |
| 507 | 676  | DNA repair protein RecO                                                | TAO_0701 | NHAL_2438 | NOC_0794 | NWAT_2316 | DNA repair protein RecO                                                | * | * | * |
| 508 | 704  | pyridoxal phosphate biosynthetic protein PdxJ                          | TAO_0702 | NHAL_2439 | NOC_0795 | NWAT_2315 | pyridoxal phosphate biosynthetic protein PdxJ                          | * | * | * |
| 509 | 330  | holo-acyl-carrier-protein synthase                                     | TAO_0703 | NHAL_2440 | NOC_0796 | NWAT_2314 | holo-acyl carrier protein synthase                                     | * | * | * |
| 510 | 889  | cysteine synthase B                                                    | TAO_0704 | NHAL_2441 | NOC_0797 | NWAT_2313 | cysteine synthase B                                                    | * | * | * |
| 511 | 2217 | -                                                                      | -        | NHAL_2442 | NOC_0798 | NWAT_2312 | hypothetical protein                                                   | * | * | * |
| 512 | 1825 | -                                                                      | -        | NHAL_2443 | NOC_0799 | NWAT_2311 | hypothetical protein                                                   | * | * | * |
| 513 | 1950 | -                                                                      | -        | NHAL_2444 | NOC_0800 | NWAT_2310 | 3'-5' exonuclease                                                      | * | * | * |
| 514 | 2122 | -                                                                      | -        | NHAL_2445 | NOC_0801 | NWAT_2309 | TrmA family RNA methyltransferase                                      | * | * | * |
| 515 | 440  | 6,7-dimethyl-8-ribityllumazine synthase                                | TAO_0705 | NHAL_2446 | NOC_0802 | NWAT_2308 | 6,7-dimethyl-8-ribityllumazine synthase                                | * | * | * |
| 516 | 364  | transcription antitermination factor NusB                              | TAO_0706 | NHAL_2447 | NOC_0803 | NWAT_2307 | transcription antitermination factor NusB                              | * | * | * |
| 517 | 853  | thiamine-monophosphate kinase                                          | TAO_0707 | NHAL_2448 | NOC_0804 | NWAT_2306 | thiamine-monophosphate kinase                                          | * | * | * |
| 518 | 504  | phosphatidylglycerophosphatase A                                       | TAO_0708 | NHAL_2449 | NOC_0805 | NWAT_2305 | phosphatidylglycerophosphatase A                                       | * | * | * |
| 519 | 1429 | protein-P-II uridylyltransferase                                       | TAO_0709 | NHAL_2450 | NOC_0806 | NWAT_2304 | protein-P-II uridylyltransferase                                       | * | * | * |
| 520 | 867  | methionine aminopeptidase                                              | TAO_0710 | NHAL_2451 | NOC_0807 | NWAT_2303 | methionine aminopeptidase, type I                                      | * | * | * |
| 521 | 810  | 30S ribosomal protein S2                                               | TAO_0711 | NHAL_2452 | NOC_0808 | NWAT_2302 | 30S ribosomal protein S2                                               | * | * | * |
| 522 | 828  | translation elongation factor Ts                                       | TAO_0712 | NHAL_2453 | NOC_0809 | NWAT_2301 | translation elongation factor Ts                                       | * | * | * |
| 523 | 758  | uridylylate kinase                                                     | TAO_0713 | NHAL_2454 | NOC_0810 | NWAT_2300 | uridylylate kinase                                                     | * | * | * |
| 524 | 511  | ribosome recycling factor                                              | TAO_0714 | NHAL_2455 | NOC_0811 | NWAT_2299 | ribosome recycling factor                                              | * | * | * |
| 525 | 729  | UDP diphosphate synthase                                               | TAO_0715 | NHAL_2456 | NOC_0812 | NWAT_2298 | UDP diphosphate synthase                                               | * | * | * |
| 526 | 756  | phosphatidate cytidyltransferase                                       | TAO_0716 | NHAL_2457 | NOC_0813 | NWAT_2297 | phosphatidate cytidyltransferase                                       | * | * | * |
| 527 | 1133 | 1-deoxy-D-xylulose 5-phosphate reductoisomerase                        | TAO_0717 | NHAL_2458 | NOC_0814 | NWAT_2296 | 1-deoxy-D-xylulose 5-phosphate reductoisomerase                        | * | * | * |
| 528 | 1222 | membrane-associated zinc protein metalloprotease                       | TAO_0718 | NHAL_2459 | NOC_0815 | NWAT_2295 | membrane-associated zinc protein metalloprotease                       | * | * | * |
| 529 | 1413 | outer membrane protein assembly factor YaeT precursor                  | TAO_0719 | NHAL_2460 | NOC_0816 | NWAT_2294 | outer membrane protein assembly complex, YaeT protein                  | * | * | * |
| 530 | 418  | outer membrane chaperone Skp                                           | TAO_0720 | NHAL_2461 | NOC_0817 | NWAT_2293 | outer membrane chaperone Skp                                           | * | * | * |
| 531 | 446  | 3-hydroxyacyl-ACP dehydratase                                          | TAO_0721 | NHAL_2462 | NOC_0818 | NWAT_2292 | 3-hydroxyacyl-ACP dehydratase                                          | * | * | * |
| 532 | 821  | acyl-(acyl-carrier-protein)--UDP-N-acetylglucosamine O-acyltransferase | TAO_0722 | NHAL_2463 | NOC_0819 | NWAT_2291 | acyl-(acyl-carrier-protein)--UDP-N-acetylglucosamine O-acyltransferase | * | * | * |
| 533 | 466  | hypothetical conserved protein                                         | TAO_0723 | NHAL_2464 | NOC_0820 | NWAT_2290 | hypothetical protein                                                   | * | * | * |

|     |      |                                                              |          |           |          |           |                                                                  |   |   |   |
|-----|------|--------------------------------------------------------------|----------|-----------|----------|-----------|------------------------------------------------------------------|---|---|---|
| 534 | 1034 | outer membrane assembly lipoprotein Yfgl                     | TAO_0724 | NHAL_2465 | NOC_0821 | NWAT_2289 | outer membrane assembly lipoprotein Yfgl                         | * | * | * |
| 535 | 1196 | small GTP-binding protein                                    | TAO_0725 | NHAL_2467 | NOC_0822 | NWAT_2288 | small GTP-binding protein domain-containing protein              | * | * | * |
| 536 | 1886 | -                                                            | -        | NHAL_2476 | NOC_0823 | NWAT_2287 | <b>OmpA/MotB domain-containing protein</b>                       | * |   |   |
| 537 | 1693 | -                                                            | -        | NHAL_2477 | NOC_0824 | NWAT_2286 | <b>thioesterase superfamily protein</b>                          | * |   |   |
| 538 | 78   | AMP-dependent synthetase and ligase                          | TAO_1063 | NHAL_2478 | NOC_0825 | NWAT_2285 | AMP-dependent synthetase and ligase                              | * | * | * |
| 539 | 2242 | -                                                            | -        | NHAL_2479 | NOC_0826 | NWAT_2284 | <b>3-hydroxyacyl-coA dehydrogenase NAD-binding protein</b>       | * |   |   |
| 540 | 2146 | -                                                            | -        | NHAL_2480 | NOC_0827 | NWAT_2283 | <b>acetyl-coA acetyltransferase</b>                              | * |   |   |
| 541 | 719  | glutamine cyclotransferase                                   | TAO_0852 | NHAL_2482 | NOC_0828 | NWAT_2281 | glutamine cyclotransferase                                       | * | * | * |
| 542 | 1408 | $\alpha$ -1,4-glucan:maltose-1-phosphate maltosyltransferase | TAO_0758 | NHAL_2490 | NOC_0829 | NWAT_2280 | $\alpha$ -1,4-glucan:maltose-1-phosphate maltosyltransferase     | * | * | * |
| 543 | 1458 | trehalose synthase/amylase treS                              | TAO_0759 | NHAL_2491 | NOC_0830 | NWAT_2279 | trehalose synthase/amylase treS                                  | * | * | * |
| 544 | 1649 | -                                                            | -        | NHAL_2492 | NOC_0831 | NWAT_2278 | <b>cupin</b>                                                     | * |   |   |
| 545 | 222  | hypothetical conserved protein                               | TAO_0761 | NHAL_2494 | NOC_0832 | NWAT_2276 | hypothetical protein                                             | * | * | * |
| 546 | 1929 | -                                                            | -        | NHAL_2656 | NOC_0833 | NWAT_2275 | <b>MotA/TolQ/exbB proton channel</b>                             | * |   |   |
| 547 | 1921 | -                                                            | -        | NHAL_2657 | NOC_0834 | NWAT_2274 | <b>OmpA/MotB domain-containing protein</b>                       | * |   |   |
| 548 | 571  | anaerobic dehydrogenase cluster protein                      | TAO_0885 | NHAL_2658 | NOC_0835 | NWAT_2273 | anaerobic dehydrogenase cluster protein                          | * | * | * |
| 549 | 1540 | hypothetical conserved protein                               | TAO_0886 | NHAL_2661 |          | NWAT_2272 | hypothetical conserved protein                                   | * |   |   |
| 550 | 748  | oxidoreductase FAD/NAD(P)-binding domain-containing protein  | TAO_0887 | NHAL_2662 | NOC_0836 | NWAT_2271 | oxidoreductase FAD/NAD(P)-binding domain-containing protein      | * | * | * |
| 551 | 1627 | -                                                            | -        | NHAL_2663 | NOC_0837 | NWAT_2270 | <b>hypothetical protein</b>                                      | * |   |   |
| 552 | 2014 | -                                                            | -        | NHAL_2664 | NOC_0838 | NWAT_2269 | <b>transport system permease</b>                                 | * |   |   |
| 553 | 1897 | -                                                            | -        | NHAL_2665 | NOC_0839 | NWAT_2268 | <b>ABC transporter-like protein</b>                              | * |   |   |
| 554 | 1923 | -                                                            | -        | NHAL_2666 | NOC_0840 | NWAT_2267 | <b>periplasmic binding protein</b>                               | * |   |   |
| 555 | 1179 | glycolate oxidase iron-sulfur subunit                        | TAO_0891 | NHAL_2667 | NOC_0841 | NWAT_2266 | glycolate oxidase iron-sulfur subunit                            | * | * | * |
| 556 | 2091 | -                                                            | -        | NHAL_2668 | NOC_0842 | NWAT_2265 | <b>cystathionine gamma-lyase</b>                                 | * |   |   |
| 557 | 892  | peptidase S49 domain-containing protein                      | TAO_0906 | NHAL_2669 | NOC_0843 | NWAT_2264 | peptidase S49 domain-containing protein                          | * | * | * |
| 558 | 987  | glycolate oxidase FAD binding subunit                        | TAO_0908 | NHAL_2670 | NOC_0844 | NWAT_2263 | glycolate oxidase FAD binding subunit                            | * | * | * |
| 559 | 74   | hypothetical conserved protein                               | TAO_0911 | NHAL_2672 | NOC_0845 | NWAT_2262 | hypothetical conserved protein                                   | * | * | * |
| 560 | 1459 | DNA polymerase III subunit alpha                             | TAO_0912 | NHAL_2673 | NOC_0846 | NWAT_2261 | DNA polymerase III subunit alpha                                 | * | * | * |
| 561 | 1990 | -                                                            | -        | NHAL_2674 | NOC_0847 | NWAT_2260 | <b>response regulator receiver modulated diguanylate cyclase</b> | * |   |   |
| 562 | 1041 | acetyl-coA carboxylase, carboxyl transferase subunit alpha   | TAO_0913 | NHAL_2675 | NOC_0848 | NWAT_2259 | acetyl-coA carboxylase, carboxyl transferase subunit alpha       | * | * | * |
| 563 | 1119 | tRNA(Ile)-lysidine synthetase                                | TAO_0914 | NHAL_2676 | NOC_0849 | NWAT_2258 | tRNA(Ile)-lysidine synthetase                                    | * | * | * |
| 564 | 1323 | CTP synthase                                                 | TAO_0915 | NHAL_2677 | NOC_0850 | NWAT_2257 | CTP synthase                                                     | * | * | * |
| 565 | 891  | 2-dehydro-3-deoxyphosphoactonate aldolase                    | TAO_0916 | NHAL_2678 | NOC_0851 | NWAT_2256 | 2-dehydro-3-deoxyphosphoactonate aldolase                        | * | * | * |
| 566 | 1160 | enolase                                                      | TAO_0917 | NHAL_2679 | NOC_0852 | NWAT_2255 | enolase                                                          | * | * | * |
| 567 | 186  | cell division protein FtsB                                   | TAO_0918 | NHAL_2680 | NOC_0853 | NWAT_2254 | septum formation initiator                                       | * | * | * |
| 568 | 641  | 2-C-methyl-D-erythritol 4-phosphate cytidyltransferase       | TAO_0919 | NHAL_2681 | NOC_0854 | NWAT_2253 | 2-C-methyl-D-erythritol 4-phosphate cytidyltransferase           | * | * | * |
| 569 | 411  | 2C-methyl-D-erythritol 2,4-cyclodiphosphate synthase         | TAO_0920 | NHAL_2682 | NOC_0855 | NWAT_2252 | 2-C-methyl-D-erythritol 2,4-cyclodiphosphate synthase            | * | * | * |
| 570 | 175  | hypothetical protein                                         | TAO_0921 | NHAL_2683 | NOC_0856 | NWAT_2251 | tRNA pseudouridine synthase D TruD                               | * | * | * |
| 571 | 2166 | -                                                            | -        | NHAL_1802 | NOC_0857 | NWAT_2249 | <b>hypothetical protein</b>                                      | * |   |   |
| 572 | 1549 | -                                                            | -        | NHAL_1803 | NOC_0858 | NWAT_2248 | <b>hypothetical protein</b>                                      | * |   |   |
| 573 | 2163 | -                                                            | -        | NHAL_2684 | NOC_0862 | NWAT_2246 | <b>diguanylate cyclase/phosphodiesterase</b>                     | * |   |   |
| 574 | 1228 | uroporphyrin-III C-methyltransferase                         | TAO_0922 | NHAL_2685 | NOC_0863 | NWAT_2245 | uroporphyrin-III C-methyltransferase                             | * | * | * |
| 575 | 2127 | glutamate dehydrogenase                                      | TAO_0447 |           | NOC_0864 | NWAT_2244 | Glu/Leu/phe/Val dehydrogenase                                    | * |   |   |
| 576 | 750  | nicotinate-nucleotide pyrophosphorylase                      | TAO_0923 | NHAL_2686 | NOC_0865 | NWAT_2243 | nicotinate-nucleotide pyrophosphorylase                          | * | * | * |
| 577 | 435  | N-acetyl-anhydromuranmyl-L-alanine amidase                   | TAO_0924 | NHAL_2687 | NOC_0866 | NWAT_2242 | N-acetyl-anhydromuranmyl-L-alanine amidase                       | * | * | * |
| 578 | 1790 | -                                                            | -        | NHAL_2689 | NOC_0867 | NWAT_2241 | <b>ATP/cobalamin adenosyltransferase</b>                         | * |   |   |
| 579 | 1656 | -                                                            | -        | NHAL_2690 | NOC_0868 | NWAT_2240 | <b>hemimethylated DNA-binding region</b>                         | * |   |   |
| 580 | 1851 | -                                                            | -        | NHAL_1052 | NOC_1928 | NWAT_1727 | <b><math>\alpha</math>-ribazole phosphatase</b>                  | * |   |   |
| 581 | 1917 | -                                                            | -        | NHAL_1053 | NOC_1927 | NWAT_1726 | <b>hypothetical protein</b>                                      | * |   |   |
| 582 | 1924 | -                                                            | -        | NHAL_3079 | NOC_1926 | NWAT_1725 | <b>hypothetical protein</b>                                      | * |   |   |
| 583 | 2275 | -                                                            | -        | NHAL_1411 | NOC_1924 | NWAT_1723 | <b>FAD linked oxidase domain-containing protein</b>              | * |   |   |

|     |      |                                                           |          |           |          |           |                                                                  |   |   |   |
|-----|------|-----------------------------------------------------------|----------|-----------|----------|-----------|------------------------------------------------------------------|---|---|---|
| 584 | 616  | abortive infection protein                                | TAO_0947 | NHAL_1412 | NOC_1923 | NWAT_1722 | abortive infection protein                                       | * | * | * |
| 585 | 366  | thiol-disulfide oxidoreductase DCC                        | TAO_1354 | NHAL_2103 | NOC_1922 | NWAT_1721 | putative thiol-disulfide oxidoreductase DCC                      | * | * | * |
| 586 | 57   | glutathione-dependent formaldehyde-activating protein     | TAO_0435 | NHAL_2104 | NOC_1921 | NWAT_1720 | glutathione-dependent formaldehyde-activating protein            | * | * | * |
| 587 | 1998 | -                                                         | -        | NHAL_1613 | NOC_1919 | NWAT_1719 | <b>LysR family transcriptional regulator</b>                     | * |   |   |
| 588 | 1606 | -                                                         | -        | NHAL_3360 | NOC_1918 | NWAT_1718 | <b>GreA/GreB family elongation factor</b>                        | * |   |   |
| 589 | 1534 | -                                                         | -        | NHAL_0108 | NOC_1917 | NWAT_1717 | <b>hypothetical protein</b>                                      | * |   |   |
| 590 | 1007 | hypothetical conserved protein                            | TAO_1270 | NHAL_1614 | NOC_1915 | NWAT_1716 | hypothetical protein                                             | * | * | * |
| 591 | 1521 | -                                                         | -        | NHAL_2561 | NOC_1914 | NWAT_1715 | <b>mechanosensitive ion channel protein MscS</b>                 | * |   |   |
| 592 | 2057 | -                                                         | -        | NHAL_1634 | NOC_1913 | NWAT_1714 | <b>hypothetical protein</b>                                      | * |   |   |
| 593 | 2243 | -                                                         | -        | NHAL_1635 | NOC_1912 | NWAT_1713 | <b>phospholipase D/transphosphatidylase</b>                      | * |   |   |
| 594 | 2130 | -                                                         | -        | NHAL_1636 | NOC_1911 | NWAT_1712 | <b>Fis family sigma-54 specific transcriptional regulator</b>    | * |   |   |
| 595 | 1063 | YjgP/YjgQ family permease                                 | TAO_1084 | NHAL_3014 | NOC_1910 | NWAT_1711 | YjgP/YjgQ family permease                                        | * | * | * |
| 596 | 1059 | YjgP/YjgQ family permease                                 | TAO_1083 | NHAL_3015 | NOC_1909 | NWAT_1710 | YjgP/YjgQ family permease                                        | * | * | * |
| 597 | 444  | RDD domain-containing protein                             | TAO_1082 | NHAL_3016 | NOC_1908 | NWAT_1709 | RDD domain-containing protein                                    | * | * | * |
| 598 | 1462 | phosphoribosylformylglycinamide synthase                  | TAO_1081 | NHAL_3017 | NOC_1907 | NWAT_1708 | phosphoribosylformylglycinamide synthase                         | * | * | * |
| 599 | 451  | Smr protein/MutS2                                         | TAO_1080 | NHAL_3018 | NOC_1906 | NWAT_1707 | Smr protein/MutS2                                                | * | * | * |
| 600 | 2810 | -                                                         | -        | -         | NOC_1905 | NWAT_1706 | <b>hypothetical protein</b>                                      | * |   |   |
| 601 | 2882 | -                                                         | -        | -         | NOC_1903 | NWAT_1705 | <b>ATP-dependent metalloprotease FtsH</b>                        | * |   |   |
| 602 | 1400 | V-type H(+)-translocating pyrophosphatase                 | TAO_1079 | NHAL_3019 | NOC_1901 | NWAT_1703 | V-type H(+)-translocating pyrophosphatase                        | * | * | * |
| 603 | 982  | hopanoid-associated sugar epimerase                       | TAO_1098 | NHAL_2984 | NOC_0999 | NWAT_2036 | hopanoid-associated sugar epimerase                              | * | * | * |
| 604 | 348  | lipid A 3-O-deacylase-like protein                        | TAO_1097 | NHAL_2985 | NOC_1000 | NWAT_2035 | lipid A 3-O-deacylase-like protein                               | * | * | * |
| 605 | 430  | tellurite resistance terB                                 | TAO_1096 | NHAL_2986 | NOC_1001 | NWAT_2034 | tellurite resistance terB                                        | * | * | * |
| 606 | 619  | stress response terD-like protein                         | TAO_1095 | NHAL_2987 | NOC_1002 | NWAT_2033 | stress protein                                                   | * | * | * |
| 607 | 949  | hypothetical conserved protein                            | TAO_1094 | NHAL_2988 | NOC_1003 | NWAT_2032 | hypothetical protein                                             | * | * | * |
| 608 | 1910 | -                                                         | -        | NHAL_2989 | NOC_1004 | NWAT_2031 | <b>hypothetical protein</b>                                      | * |   |   |
| 609 | 980  | hypothetical conserved protein                            | TAO_1093 | NHAL_2990 | NOC_1005 | NWAT_2030 | hypothetical protein                                             | * | * | * |
| 610 | 884  | ATP/GTP-binding protein                                   | TAO_1092 | NHAL_2991 | NOC_1006 | NWAT_2029 | ATP/GTP-binding protein                                          | * | * | * |
| 611 | 1014 | hypothetical conserved protein                            | TAO_1091 | NHAL_2992 | NOC_1007 | NWAT_2028 | hypothetical protein                                             | * | * | * |
| 612 | 609  | stress response terD-like protein                         | TAO_1090 | NHAL_2993 | NOC_1008 | NWAT_2027 | stress protein                                                   | * | * | * |
| 613 | 2126 | -                                                         | -        | NHAL_2995 | NOC_1009 | NWAT_2025 | <b>nicotinate phosphoribosyltransferase</b>                      | * |   |   |
| 614 | 1215 | major facilitator superfamily protein                     | TAO_1386 | NHAL_1954 | NOC_1010 | NWAT_2024 | major facilitator superfamily protein                            | * | * | * |
| 615 | 2088 | -                                                         | -        | NHAL_1955 | NOC_1011 | NWAT_2023 | <b>peptidase M50</b>                                             | * |   |   |
| 616 | 1711 | hypothetical conserved protein                            | TAO_1588 | -         | NOC_1012 | NWAT_2021 | hypothetical conserved protein                                   | * |   |   |
| 617 | 669  | 3-isopropylmalate dehydratase, small subunit              | TAO_1385 | NHAL_1961 | NOC_1013 | NWAT_2020 | 3-isopropylmalate dehydratase small subunit                      | * | * | * |
| 618 | 1062 | 3-isopropylmalate dehydrogenase                           | TAO_1384 | NHAL_1962 | NOC_1014 | NWAT_2019 | 3-isopropylmalate dehydrogenase                                  | * | * | * |
| 619 | 1644 | hypothetical protein                                      | TAO_1383 | -         | NOC_1015 | NWAT_2018 | sulfatase                                                        | * |   |   |
| 620 | 1031 | aspartate-semialdehyde dehydrogenase                      | TAO_1380 | NHAL_1963 | NOC_1016 | NWAT_2017 | aspartate-semialdehyde dehydrogenase                             | * | * | * |
| 621 | 512  | hypothetical conserved protein                            | TAO_1378 | NHAL_1964 | NOC_1017 | NWAT_2016 | FimV N-terminal domain-containing protein                        | * | * | * |
| 622 | 774  | tRNA pseudouridine synthase A                             | TAO_1377 | NHAL_1967 | NOC_1018 | NWAT_2013 | tRNA pseudouridine synthase A                                    | * | * | * |
| 623 | 589  | N-(5'-phosphoribosyl)anthranilate isomerase               | TAO_1376 | NHAL_1968 | NOC_1019 | NWAT_2012 | N-(5'-phosphoribosyl)anthranilate isomerase                      | * | * | * |
| 624 | 1191 | tryptophan synthase subunit alpha                         | TAO_1375 | NHAL_1969 | NOC_1020 | NWAT_2011 | tryptophan synthase subunit beta                                 | * | * | * |
| 625 | 749  | tryptophan synthase subunit alpha                         | TAO_1374 | NHAL_1970 | NOC_1021 | NWAT_2010 | tryptophan synthase subunit alpha                                | * | * | * |
| 626 | 919  | acetyl-coA carboxylase, carboxyl transferase subunit beta | TAO_1373 | NHAL_1971 | NOC_1022 | NWAT_2009 | acetyl-coA carboxylase carboxyl transferase subunit beta         | * | * | * |
| 627 | 1145 | folylpolyglutamate synthase/dihydrofolate synthase        | TAO_1372 | NHAL_1972 | NOC_1023 | NWAT_2008 | bifunctional folylpolyglutamate synthase/ dihydrofolate synthase | * | * | * |
| 628 | 2622 | -                                                         | -        | -         | NOC_1024 | NWAT_2007 | <b>hypothetical protein</b>                                      | * |   |   |
| 629 | 2846 | -                                                         | -        | -         | NOC_1025 | NWAT_2006 | <b>patatin</b>                                                   | * |   |   |
| 630 | 597  | tRNA (guanine-N(7)-)-methyltransferase                    | TAO_1371 | NHAL_1973 | NOC_1026 | NWAT_2005 | tRNA (guanine-N(7)-)-methyltransferase                           | * | * | * |
| 631 | 1747 | -                                                         | -        | NHAL_1974 | NOC_1027 | NWAT_2004 | <b>MarR family transcriptional regulator</b>                     | * |   |   |
| 632 | 1742 | -                                                         | -        | NHAL_1975 | NOC_1028 | NWAT_2003 | <b>L-ectoine synthase</b>                                        | * |   |   |
| 633 | 2155 | -                                                         | -        | NHAL_1976 | NOC_1029 | NWAT_2002 | <b>amino acid-binding ACT domain-containing protein</b>          | * |   |   |

|     |      |                                                                                     |          |           |              |                                                  |                                                                               |   |   |   |
|-----|------|-------------------------------------------------------------------------------------|----------|-----------|--------------|--------------------------------------------------|-------------------------------------------------------------------------------|---|---|---|
| 634 | 2829 | -                                                                                   | -        | NOC_1030  | NWAT_2001    | <b>mechanosensitive ion channel protein MscS</b> | *                                                                             |   |   |   |
| 635 | 2648 | -                                                                                   | -        | NOC_1031  | NWAT_2000(2) | <b>hypothetical protein</b>                      | *                                                                             |   |   |   |
| 636 | 2723 | -                                                                                   | -        | NOC_1032  | NWAT_2000(1) | <b>hypothetical protein</b>                      | *                                                                             |   |   |   |
| 637 | 1509 | -                                                                                   | -        | NHAL_3578 | NOC_1035     | NWAT_1997                                        | <b>hypothetical protein</b>                                                   | * |   |   |
| 638 | 1187 | <b>seryl-tRNA synthetase</b>                                                        | TAO_0115 | NHAL_3577 | NOC_1036     | NWAT_1996                                        | seryl-tRNA synthetase                                                         | * | * | * |
| 639 | 709  | <b>peptidase M50</b>                                                                | TAO_0116 | NHAL_3576 | NOC_1037     | NWAT_1995                                        | peptidase M50                                                                 | * | * | * |
| 640 | 1208 | <b>tryptophanyl-tRNA synthetase</b>                                                 | TAO_0117 | NHAL_3575 | NOC_1038     | NWAT_1994                                        | tryptophanyl-tRNA synthetase                                                  | * | * | * |
| 641 | 760  | <b>chromosome segregation and condensation protein ScpA</b>                         | TAO_0118 | NHAL_3574 | NOC_1039     | NWAT_1993                                        | chromosome segregation and condensation protein ScpA                          | * | * | * |
| 642 | 530  | <b>segregation and condensation protein B</b>                                       | TAO_0119 | NHAL_3573 | NOC_1040     | NWAT_1992                                        | chromosome segregation and condensation protein ScpB                          | * | * | * |
| 643 | 759  | <b>ribosomal large subunit pseudouridine synthase B</b>                             | TAO_0120 | NHAL_3572 | NOC_1041     | NWAT_1991                                        | RNA-binding S4 domain-containing protein                                      | * | * | * |
| 644 | 782  | <b>squalene/phytoene synthase</b>                                                   | TAO_0121 | NHAL_3571 | NOC_1042     | NWAT_1990                                        | squalene/phytoene synthase                                                    | * | * | * |
| 645 | 321  | <b>Fe2-S2-type ferredoxin</b>                                                       | TAO_0122 | NHAL_3570 | NOC_1043     | NWAT_1989                                        | Fe2-S2-type ferredoxin                                                        | * | * | * |
| 646 | 310  | <b>iron-sulfur cluster insertion protein ErpA</b>                                   | TAO_0123 | NHAL_3569 | NOC_1044     | NWAT_1988                                        | iron-sulfur cluster assembly accessory protein                                | * | * | * |
| 647 | 307  | <b>integral membrane protein ccmA involved in cell shape</b>                        | TAO_0124 | NHAL_3568 | NOC_1045     | NWAT_1987                                        | integral membrane protein ccmA involved in cell shape determination           | * | * | * |
| 648 | 548  | <b>hypothetical conserved protein</b>                                               | TAO_0125 | NHAL_3567 | NOC_1046     | NWAT_1986                                        | hypothetical protein                                                          | * | * | * |
| 649 | 1002 | <b>N-acetyl-gamma-glutamyl-phosphate reductase</b>                                  | TAO_0126 | NHAL_3566 | NOC_1047     | NWAT_1985                                        | N-acetyl-gamma-glutamyl-phosphate reductase                                   | * | * | * |
| 650 | 1250 | <b>phosphoribosylaminoimidazolecarboxamide formyltransferase/IMP cyclohydrolase</b> | TAO_0127 | NHAL_3564 | NOC_1048     | NWAT_1984                                        | phosphoribosylaminoimidazolecarboxamide formyltransferase/IMP cyclohydrolase  | * | * | * |
| 651 | 227  | <b>Fis family transcriptional regulator</b>                                         | TAO_0128 | NHAL_3563 | NOC_1049     | NWAT_1983                                        | Fis family transcriptional regulator                                          | * | * | * |
| 652 | 824  | <b>50S ribosomal protein L11 methyltransferase</b>                                  | TAO_0129 | NHAL_3562 | NOC_1050     | NWAT_1981                                        | 50S ribosomal protein L11 methyltransferase                                   | * | * | * |
| 653 | 1270 | <b>acetyl-coA carboxylase biotin carboxylase subunit</b>                            | TAO_0130 | NHAL_3561 | NOC_1051     | NWAT_1980                                        | acetyl-coA carboxylase, biotin carboxylase                                    | * | * | * |
| 654 | 360  | <b>acetyl-coA carboxylase biotin carboxyl carrier protein</b>                       | TAO_0131 | NHAL_3560 | NOC_1052     | NWAT_1979                                        | acetyl-coA carboxylase, biotin carboxyl carrier protein                       | * | * | * |
| 655 | 377  | <b>3-dehydroquinate dehydratase</b>                                                 | TAO_0132 | NHAL_3559 | NOC_1053     | NWAT_1978                                        | 3-dehydroquinate dehydratase                                                  | * | * | * |
| 656 | 473  | <b>thioredoxin</b>                                                                  | TAO_0133 | NHAL_3558 | NOC_1054     | NWAT_1977                                        | alkyl hydroperoxide reductase/thiol specific antioxidant/ mal allergen        | * | * | * |
| 657 | 1354 | <b>thiol:disulfide interchange protein</b>                                          | TAO_0134 | NHAL_3557 | NOC_1055     | NWAT_1976                                        | cytochrome c biogenesis protein transmembrane region                          | * | * | * |
| 658 | 267  | <b>divalent ion tolerance protein CutA</b>                                          | TAO_0135 | NHAL_3556 | NOC_1056     | NWAT_1975                                        | CutA1 divalent ion tolerance protein                                          | * | * | * |
| 659 | 288  | <b>hypothetical conserved protein</b>                                               | TAO_0136 | NHAL_3555 | NOC_1057     | NWAT_1974                                        | hypothetical protein                                                          | * | * | * |
| 660 | 525  | <b>SAM-dependent methyltransferase family protein</b>                               | TAO_0137 | NHAL_3554 | NOC_1058     | NWAT_1973                                        | SAM-dependent methyltransferase family protein                                | * | * | * |
| 661 | 1673 | -                                                                                   | -        | NHAL_3551 | NOC_1059     | NWAT_1972                                        | <b>hypothetical protein</b>                                                   | * |   |   |
| 662 | 359  | <b>pentapeptide repeat-containing protein</b>                                       | TAO_0138 | NHAL_3550 | NOC_1060     | NWAT_1971                                        | pentapeptide repeat-containing protein                                        | * | * | * |
| 663 | 1860 | -                                                                                   | -        | NHAL_3549 | NOC_1061     | NWAT_1970                                        | <b>Crp/Fnr family transcriptional regulator</b>                               | * |   |   |
| 664 | 2246 | -                                                                                   | -        | NHAL_3548 | NOC_1062     | NWAT_1969                                        | <b>adenylyl cyclase class-3/4/guanylyl cyclase</b>                            | * |   |   |
| 665 | 1538 | -                                                                                   | -        | NHAL_3546 | NOC_1063     | NWAT_1968                                        | <b>TPR repeat-containing protein</b>                                          | * |   |   |
| 666 | 2699 | -                                                                                   | -        | -         | NOC_1065     | NWAT_1964                                        | <b>hypothetical protein</b>                                                   | * |   |   |
| 667 | 2595 | -                                                                                   | -        | -         | NOC_1068     | NWAT_1957                                        | <b>hypothetical protein</b>                                                   | * |   |   |
| 668 | 2605 | -                                                                                   | -        | -         | NOC_1069     | NWAT_1956                                        | <b>hypothetical protein</b>                                                   | * |   |   |
| 669 | 2784 | -                                                                                   | -        | -         | NOC_1073     | NWAT_1955                                        | <b>ribonuclease BN</b>                                                        | * |   |   |
| 670 | 1609 | -                                                                                   | -        | NHAL_2917 | NOC_1074     | NWAT_1954                                        | <b>hypothetical protein</b>                                                   | * |   |   |
| 671 | 1619 | -                                                                                   | -        | NHAL_2918 | NOC_1075     | NWAT_1953                                        | <b>hypothetical protein</b>                                                   | * |   |   |
| 672 | 1969 | -                                                                                   | -        | NHAL_2051 | NOC_1076     | NWAT_1952                                        | <b>group 1 glycosyl transferase</b>                                           | * |   |   |
| 673 | 1703 | -                                                                                   | -        | NHAL_2052 | NOC_1077     | NWAT_1951                                        | <b>bifunctional 6-pyruvoyl tetrahydropterin synthase/hypothetical protein</b> | * |   |   |
| 674 | 2017 | -                                                                                   | -        | NHAL_2053 | NOC_1078     | NWAT_1950                                        | <b>putative dehydrogenase</b>                                                 | * |   |   |
| 675 | 2048 | -                                                                                   | -        | NHAL_2054 | NOC_1079     | NWAT_1949                                        | <b>bifunctional deaminase-reductase domain-containing protein</b>             | * |   |   |
| 676 | 1873 | -                                                                                   | -        | NHAL_2055 | NOC_1080     | NWAT_1948                                        | <b>hypothetical protein</b>                                                   | * |   |   |
| 677 | 1807 | -                                                                                   | -        | NHAL_2056 | NOC_1081     | NWAT_1947                                        | <b>S-isoprenylcysteine methyltransferase-like protein</b>                     | * |   |   |
| 678 | 1779 | -                                                                                   | -        | NHAL_2057 | NOC_1082     | NWAT_1946                                        | <b>hypothetical protein</b>                                                   | * |   |   |
| 679 | 1273 | <b>hypothetical conserved protein</b>                                               | TAO_0933 | NHAL_2058 | NOC_1083     | NWAT_1945                                        | hypothetical protein                                                          | * | * | * |
| 680 | 981  | <b><math>\alpha</math>-L-glutamate ligase</b>                                       | TAO_0934 | NHAL_2059 | NOC_1084     | NWAT_1944                                        | $\alpha$ -L-glutamate ligase-like protein                                     | * | * | * |
| 681 | 1789 | -                                                                                   | -        | NHAL_2061 | NOC_1085     | NWAT_1943                                        | <b>phage SPO1 DNA polymerase-like protein</b>                                 | * |   |   |
| 682 | 1759 | -                                                                                   | -        | NHAL_2062 | NOC_1086     | NWAT_1942                                        | <b>FKBP-type peptidylprolyl isomerase</b>                                     | * |   |   |
| 683 | 2049 | -                                                                                   | -        | NHAL_2064 | NOC_1087     | NWAT_1941                                        | <b>peptidase M42 family protein</b>                                           | * |   |   |

|     |      |                                                                                 |          |           |          |           |                                                                          |   |   |   |
|-----|------|---------------------------------------------------------------------------------|----------|-----------|----------|-----------|--------------------------------------------------------------------------|---|---|---|
| 684 | 502  | <b>MarR family transcriptional regulator</b>                                    | TAO_1179 | NHAL_2066 | NOC_1088 | NWAT_1940 | MarR family transcriptional regulator                                    | * | * | * |
| 685 | 1882 | -                                                                               | -        | NHAL_2068 | NOC_1089 | NWAT_1939 | <b>hypothetical protein</b>                                              | * |   |   |
| 686 | 323  | <b>chain A, red copper protein nitrosocyanin</b>                                | TAO_1178 | NHAL_2069 | NOC_1090 | NWAT_1938 | A, red copper protein nitrosocyanin                                      | * | * | * |
| 687 | 1453 | <b>valyl-tRNA synthetase</b>                                                    | TAO_1177 | NHAL_2070 | NOC_1091 | NWAT_1937 | Valyl-tRNA synthetase                                                    | * | * | * |
| 688 | 1629 | -                                                                               | -        | NHAL_1999 | NOC_1092 | NWAT_1936 | <b>SelT/selW/selH selenoprotein</b>                                      | * |   |   |
| 689 | 233  | <b>hypothetical conserved protein</b>                                           | TAO_1089 | NHAL_3008 | NOC_1094 | NWAT_1935 | hypothetical protein                                                     | * | * | * |
| 690 | 31   | -                                                                               | -        | NHAL_1266 | NOC_1098 | NWAT_1928 | <b>hypothetical protein</b>                                              | * |   |   |
| 691 | 121  | -                                                                               | -        | NHAL_1269 | NOC_1105 |           |                                                                          | * |   |   |
| 692 | 347  | <b>isoprenylcysteine carboxyl methyltransferase</b>                             | TAO_1352 | NHAL_2105 | NOC_1112 | NWAT_1916 | isoprenylcysteine carboxyl methyltransferase                             | * | * | * |
| 693 | 1676 | -                                                                               | -        | NHAL_2107 | NOC_1113 | NWAT_1915 | <b>hypothetical protein</b>                                              | * |   |   |
| 694 | 2087 | -                                                                               | -        | NHAL_2108 | NOC_1114 | NWAT_1914 | <b>glycerophosphoryl diester phosphodiesterase</b>                       | * |   |   |
| 695 | 2128 | -                                                                               | -        | NHAL_2129 | NOC_1115 | NWAT_1913 | <b>proton-translocating NADH-quinone oxidoreductase, chain N</b>         | * |   |   |
| 696 | 2168 | -                                                                               | -        | NHAL_2130 | NOC_1116 | NWAT_1912 | <b>proton-translocating NADH-quinone oxidoreductase, chain M</b>         | * |   |   |
| 697 | 2219 | -                                                                               | -        | NHAL_2131 | NOC_1117 | NWAT_1911 | <b>proton-translocating NADH-quinone oxidoreductase subunit L</b>        | * |   |   |
| 698 | 1637 | -                                                                               | -        | NHAL_2132 | NOC_1118 | NWAT_1910 | <b>NADH-ubiquinone oxidoreductase chain 4L</b>                           | * |   |   |
| 699 | 1771 | -                                                                               | -        | NHAL_2133 | NOC_1119 | NWAT_1909 | <b>NADH-ubiquinone/plastoquinone oxidoreductase chain 6</b>              | * |   |   |
| 700 | 1862 | -                                                                               | -        | NHAL_2134 | NOC_1120 | NWAT_1908 | <b>NADH-quinone oxidoreductase subunit I</b>                             | * |   |   |
| 701 | 2052 | -                                                                               | -        | NHAL_2135 | NOC_1121 | NWAT_1907 | <b>NADH dehydrogenase subunit H</b>                                      | * |   |   |
| 702 | 2264 | -                                                                               | -        | NHAL_2136 | NOC_1122 | NWAT_1906 | <b>NADH-quinone oxidoreductase subunit G</b>                             | * |   |   |
| 703 | 2113 | -                                                                               | -        | NHAL_2137 | NOC_1123 | NWAT_1905 | <b>NADH-quinone oxidoreductase subunit F</b>                             | * |   |   |
| 704 | 1719 | -                                                                               | -        | NHAL_2138 | NOC_1124 | NWAT_1904 | <b>NADH-quinone oxidoreductase subunit E</b>                             | * |   |   |
| 705 | 2234 | -                                                                               | -        | NHAL_2140 | NOC_1125 | NWAT_1903 | <b>NADH dehydrogenase I subunit D</b>                                    | * |   |   |
| 706 | 1899 | -                                                                               | -        | NHAL_2141 | NOC_1126 | NWAT_1902 | <b>NADH-quinone oxidoreductase subunit B</b>                             | * |   |   |
| 707 | 1725 | -                                                                               | -        | NHAL_2142 | NOC_1127 | NWAT_1901 | <b>NADH-ubiquinone/plastoquinone oxidoreductase chain 3</b>              | * |   |   |
| 708 | 1785 | -                                                                               | -        | NHAL_1755 | NOC_1129 | NWAT_1897 | <b>RND family efflux transporter MFP subunit</b>                         | * |   |   |
| 709 | 1934 | -                                                                               | -        | NHAL_2145 | NOC_1131 | NWAT_1895 | <b>hypothetical protein</b>                                              | * |   |   |
| 710 | 1646 | -                                                                               | -        | NHAL_2156 | NOC_1133 | NWAT_1893 | <b>hypothetical protein</b>                                              | * |   |   |
| 711 | 570  | <b>inorganic pyrophosphatase</b>                                                | TAO_1347 | NHAL_2158 | NOC_1134 | NWAT_1892 | inorganic pyrophosphatase                                                | * | * | * |
| 712 | 1141 | <b>class I and II aminotransferase</b>                                          | TAO_1337 | NHAL_3210 | NOC_1138 | NWAT_1881 | class I and II aminotransferase                                          | * | * | * |
| 713 | 1386 | <b>excinuclease ABC subunit B</b>                                               | TAO_1336 | NHAL_3209 | NOC_1139 | NWAT_1880 | excinuclease ABC subunit B                                               | * | * | * |
| 714 | 1404 | <b>threonyl-tRNA synthetase</b>                                                 | TAO_1335 | NHAL_3208 | NOC_1140 | NWAT_1879 | threonyl-tRNA synthetase                                                 | * | * | * |
| 715 | 334  | <b>translation initiation factor IF-3</b>                                       | TAO_1334 | NHAL_3207 | NOC_1141 | NWAT_1878 | translation initiation factor IF-3                                       | * | * | * |
| 716 | 155  | <b>50S ribosomal protein L35</b>                                                | TAO_1333 | NHAL_3206 | NOC_1142 | NWAT_1877 | 50S ribosomal protein L35                                                | * | * | * |
| 717 | 351  | <b>50S ribosomal protein L20</b>                                                | TAO_1332 | NHAL_3205 | NOC_1143 | NWAT_1876 | 50S ribosomal protein L20                                                | * | * | * |
| 718 | 1083 | <b>phenylalanyl-tRNA synthetase subunit alpha</b>                               | TAO_1331 | NHAL_3204 | NOC_1144 | NWAT_1875 | phenylalanyl-tRNA synthetase subunit alpha                               | * | * | * |
| 719 | 1407 | <b>phenylalanyl-tRNA synthetase subunit beta</b>                                | TAO_1330 | NHAL_3203 | NOC_1145 | NWAT_1874 | phenylalanyl-tRNA synthetase subunit beta                                | * | * | * |
| 720 | 286  | <b>integration host factor subunit alpha</b>                                    | TAO_1329 | NHAL_3202 | NOC_1146 | NWAT_1873 | integration host factor subunit alpha                                    | * | * | * |
| 721 | 357  | <b>MerR family transcriptional regulator</b>                                    | TAO_1328 | NHAL_3201 | NOC_1147 | NWAT_1872 | MerR family transcriptional regulator                                    | * | * | * |
| 722 | 1876 | -                                                                               | -        | NHAL_3198 | NOC_1148 | NWAT_1870 | <b>hypothetical protein</b>                                              | * |   |   |
| 723 | 1720 | -                                                                               | -        | NHAL_3197 | NOC_1149 | NWAT_1869 | <b>hypothetical protein</b>                                              | * |   |   |
| 724 | 2067 | -                                                                               | -        | NHAL_3196 | NOC_1150 | NWAT_1868 | <b>hypothetical protein</b>                                              | * |   |   |
| 725 | 1162 | <b>O-succinylhomoserine sulfhydrylase</b>                                       | TAO_1327 | NHAL_3194 | NOC_1151 | NWAT_1867 | O-succinylhomoserine sulfhydrylase                                       | * | * | * |
| 726 | 1764 | -                                                                               | -        | NHAL_3192 | NOC_1152 | NWAT_1866 | <b>hypothetical protein</b>                                              | * |   |   |
| 727 | 1983 | -                                                                               | -        | NHAL_3189 | NOC_1153 | NWAT_1865 | <b>alpha/beta hydrolase fold protein</b>                                 | * |   |   |
| 728 | 1791 | -                                                                               | -        | NHAL_3188 | NOC_1154 | NWAT_1864 | <b>G-D-S-L family lipolytic protein</b>                                  | * |   |   |
| 729 | 415  | <b>A32 family peptidase</b>                                                     | TAO_0848 | NHAL_3187 | NOC_1155 | NWAT_1863 | A32 family peptidase                                                     | * | * | * |
| 730 | 1362 | <b>peptidase S9 prolyl oligopeptidase active site domain-containing protein</b> | TAO_0849 | NHAL_3185 | NOC_1156 | NWAT_1862 | peptidase S9 prolyl oligopeptidase active site domain-containing protein | * | * | * |
| 731 | 651  | -                                                                               | -        | NHAL_1142 | NOC_1165 | NWAT_1860 | <b>catalase</b>                                                          | * |   |   |
| 732 | 72   | <b>cytosine/adenosine deaminase</b>                                             | TAO_0890 | NHAL_1410 | NOC_1166 | NWAT_1859 | CMP/dCMP deaminase zinc-binding protein                                  | * | * | * |

|     |      |                                                                |          |           |             |                                      |                                                                |   |   |
|-----|------|----------------------------------------------------------------|----------|-----------|-------------|--------------------------------------|----------------------------------------------------------------|---|---|
| 733 | 2813 | -                                                              | -        | NOC_1167  | NWAT_1858   | signal transduction histidine kinase | *                                                              |   |   |
| 734 | 1732 | -                                                              | -        | NHAL_2743 | NOC_1168    | NWAT_1857                            | hypothetical protein                                           | * |   |
| 735 | 606  | endonuclease III                                               | TAO_0987 | NHAL_2744 | NOC_1169    | NWAT_1856                            | endonuclease III                                               | * | * |
| 736 | 655  | electron transport complex protein RxsE                        | TAO_0988 | NHAL_2745 | NOC_1170    | NWAT_1855                            | RnfABCDGE type electron transport complex subunit E            | * | * |
| 737 | 509  | RnfABCDGE type electron transport complex subunit G            | TAO_0989 | NHAL_2746 | NOC_1171    | NWAT_1854                            | electron transport complex, RnfABCDGE type, G subunit          | * | * |
| 738 | 1005 | RnfABCDGE type electron transport complex subunit D            | TAO_0990 | NHAL_2747 | NOC_1172    | NWAT_1853                            | RnfABCDGE type electron transport complex subunit D            | * | * |
| 739 | 1253 | RnfABCDGE type electron transport complex subunit C            | TAO_0991 | NHAL_2748 | NOC_1173    | NWAT_1852                            | RnfABCDGE type electron transport complex subunit C            | * | * |
| 740 | 569  | RnfABCDGE type electron transport complex subunit B            | TAO_0992 | NHAL_2749 | NOC_1174    | NWAT_1851                            | electron transport complex, RnfABCDGE type, B subunit          | * | * |
| 741 | 2218 | -                                                              | -        | NHAL_0864 | NOC_1175    | NWAT_1848                            | TrkA-C, di- and tricarboxylate transporters                    | * |   |
| 742 | 1574 | -                                                              | -        | NHAL_0865 | NOC_1176    | NWAT_1847                            | hypothetical protein                                           | * |   |
| 743 | 22   | family 2 glycosyl transferase                                  | TAO_0693 | NHAL_0867 | NOC_0588    | NWAT_1846                            | family 2 glycosyl transferase                                  | * | * |
| 744 | 1580 | -                                                              | -        | NHAL_0868 | NOC_0587    | NWAT_1845                            | hypothetical protein                                           | * |   |
| 745 | 273  | hypothetical conserved protein                                 | TAO_1444 | NHAL_0869 | NOC_1178    | NWAT_1844                            | hypothetical protein                                           | * | * |
| 746 | 271  | preprotein translocase subunit YajC                            | TAO_1443 | NHAL_0870 | NOC_1179    | NWAT_1843                            | preprotein translocase subunit YajC                            | * | * |
| 747 | 625  | deoxycytidine triphosphate deaminase                           | TAO_1442 | NHAL_0871 | NOC_1180    | NWAT_1842                            | deoxycytidine triphosphate deaminase                           | * | * |
| 748 | 533  | phosphoribosylglycinamide formyltransferase                    | TAO_1441 | NHAL_0872 | NOC_1181    | NWAT_1841                            | phosphoribosylglycinamide formyltransferase                    | * | * |
| 749 | 1025 | phosphoribosylaminoimidazole synthetase                        | TAO_1440 | NHAL_0873 | NOC_1182    | NWAT_1840                            | phosphoribosylformylglycinamide cyclo-ligase                   | * | * |
| 750 | 846  | hypothetical conserved protein                                 | TAO_1439 | NHAL_0874 | NOC_1185    | NWAT_1839                            | hypothetical protein                                           | * | * |
| 751 | 577  | CDP-alcohol phosphatidyltransferase                            | TAO_1438 | NHAL_0875 | NOC_1186    | NWAT_1838                            | CDP-alcohol phosphatidyltransferase                            | * | * |
| 752 | 644  | DnaA regulatory inactivator Hda                                | TAO_1437 | NHAL_0876 | NOC_1187    | NWAT_1837                            | DnaA regulatory inactivator Hda                                | * | * |
| 753 | 870  | hypothetical conserved protein                                 | TAO_1436 | NHAL_0877 | NOC_1188    | NWAT_1836                            | 2,3-bisphosphoglycerate-independent phosphoglycerate mutase    | * | * |
| 754 | 1334 | single-stranded-DNA-specific exonuclease RecJ                  | TAO_1435 | NHAL_0878 | NOC_1189    | NWAT_1835                            | single-stranded-DNA-specific exonuclease RecJ                  | * | * |
| 755 | 856  | ATP-NAD/acoX kinase                                            | TAO_1434 | NHAL_0879 | NOC_1190    | NWAT_1834                            | ATP-NAD/acoX kinase                                            | * | * |
| 756 | 1260 | DNA repair protein RecN                                        | TAO_1433 | NHAL_0880 | NOC_1191    | NWAT_1833                            | DNA repair protein RecN                                        | * | * |
| 757 | 2594 | -                                                              | -        |           | NOC_1192(1) | NWAT_1832                            | multiple antibiotic resistance (MarC)-like proteins            | * |   |
| 758 | 2506 | -                                                              | -        |           | NOC_1192(2) | NWAT_1831                            | multiple antibiotic resistance (MarC)-like proteins            | * |   |
| 759 | 503  | abortive infection protein                                     | TAO_1432 | NHAL_0881 | NOC_1193    | NWAT_1830                            | abortive infection protein                                     | * | * |
| 760 | 463  | ferric-uptake regulator                                        | TAO_1431 | NHAL_0882 | NOC_1194    | NWAT_1829                            | ferric-uptake regulator                                        | * | * |
| 761 | 379  | SmpA/OmlA domain-containing protein                            | TAO_1430 | NHAL_0883 | NOC_1195    | NWAT_1828                            | SmpA/OmlA domain-containing protein                            | * | * |
| 762 | 201  | hypothetical conserved protein                                 | TAO_1429 | NHAL_0884 | NOC_1196    | NWAT_1827                            | hypothetical protein                                           | * | * |
| 763 | 434  | cyclase/dehydrase                                              | TAO_1428 | NHAL_0885 | NOC_1197    | NWAT_1826                            | cyclase/dehydrase                                              | * | * |
| 764 | 522  | SsrA-binding protein                                           | TAO_1427 | NHAL_0887 | NOC_1198    | NWAT_1824                            | SsrA-binding protein                                           | * | * |
| 765 | 79   | DNA methyltransferase                                          | TAO_0754 | NHAL_3964 | NOC_1201    | NWAT_1822                            | N-6 DNA methylase                                              | * | * |
| 766 | 1630 | -                                                              | -        | NHAL_3911 | NOC_1203    | NWAT_1821                            | DNA polymerase beta domain-containing protein                  | * |   |
| 767 | 1633 | type I restriction modification DNA specificity domain protein | TAO_0753 |           | NOC_1204    | NWAT_1820                            | type I restriction modification DNA specificity domain protein | * |   |
| 768 | 2136 | type III restriction endonuclease subunit R                    | TAO_0752 |           | NOC_1205    | NWAT_1819                            | type III restriction endonuclease subunit R                    | * |   |
| 769 | 44   | -                                                              | -        | NHAL_1469 | NOC_0096    | NWAT_0080                            | hypothetical protein                                           | * |   |
| 770 | 2680 | -                                                              | -        |           | NOC_0097    | NWAT_0081                            | hypothetical protein                                           | * |   |
| 771 | 1787 | -                                                              | -        | NHAL_0097 | NOC_0098    | NWAT_0083                            | hypothetical protein                                           | * |   |
| 772 | 2215 | -                                                              | -        | NHAL_0095 | NOC_0100    | NWAT_0085                            | glycogen/starch synthase, ADP-glucose type                     | * |   |
| 773 | 2657 | -                                                              | -        |           | NOC_0102    | NWAT_0087                            | putative signal transduction protein with CBS domains          | * |   |
| 774 | 2631 | -                                                              | -        |           | NOC_0103    | NWAT_0088                            | hypothetical protein                                           | * |   |
| 775 | 2023 | -                                                              | -        | NHAL_0110 | NOC_0104    | NWAT_0089                            | membrane-bound metal-dependent hydrolase                       | * |   |
| 776 | 701  | hypothetical conserved protein                                 | TAO_1656 | NHAL_0111 | NOC_0105    | NWAT_0090                            | hypothetical protein                                           | * | * |
| 777 | 2660 | -                                                              | -        |           | NOC_0106    | NWAT_0091                            | hypothetical protein                                           | * |   |
| 778 | 1931 | -                                                              | -        | NHAL_0113 | NOC_0107    | NWAT_0092                            | NAD-dependent epimerase/dehydratase                            | * |   |
| 779 | 2760 | -                                                              | -        |           | NOC_0108    | NWAT_0093                            | mechanosensitive ion channel protein MscS                      | * |   |
| 780 | 885  | formate/nitrite transporter                                    | TAO_0113 | NHAL_0354 | NOC_0109    | NWAT_0094                            | formate/nitrite transporter                                    | * | * |
| 781 | 1442 | 2-oxoglutarate dehydrogenase, E1 subunit                       | TAO_1664 | NHAL_0099 | NOC_0111    | NWAT_0095                            | 2-oxoglutarate dehydrogenase, E1 subunit                       | * | * |



|     |      |                                                                                |          |           |          |           |                                                                                |   |   |   |
|-----|------|--------------------------------------------------------------------------------|----------|-----------|----------|-----------|--------------------------------------------------------------------------------|---|---|---|
| 782 | 1068 | 2-oxoglutarate dehydrogenase, E2 subunit, dihydrolipoamide succinyltransferase | TAO_1663 | NHAL_0100 | NOC_0112 | NWAT_0096 | 2-oxoglutarate dehydrogenase, E2 subunit, dihydrolipoamide succinyltransferase | * | * | * |
| 783 | 2143 | -                                                                              | -        | NHAL_0101 | NOC_0113 | NWAT_0097 | dihydrolipoamide dehydrogenase                                                 | * |   |   |
| 784 | 2207 | -                                                                              | -        | NHAL_1798 | NOC_0115 | NWAT_0099 | ABC transporter transmembrane region                                           | * |   |   |
| 785 | 2726 | -                                                                              | -        |           | NOC_0116 | NWAT_0101 | hypothetical protein                                                           | * |   |   |
| 786 | 1139 | hypothetical conserved protein                                                 | TAO_1661 | NHAL_0104 | NOC_0117 | NWAT_0102 | hypothetical protein                                                           | * | * | * |
| 787 | 1154 | hypothetical conserved protein                                                 | TAO_1660 | NHAL_0105 | NOC_0118 | NWAT_0103 | hypothetical protein                                                           | * | * | * |
| 788 | 345  | hypothetical conserved protein                                                 | TAO_1659 | NHAL_0106 | NOC_0119 | NWAT_0104 | hypothetical protein                                                           | * | * | * |
| 789 | 279  | hypothetical conserved protein                                                 | TAO_1658 | NHAL_0107 | NOC_0120 | NWAT_0105 | hypothetical protein                                                           | * | * | * |
| 790 | 1584 | hypothetical conserved protein                                                 | TAO_1657 |           | NOC_0121 | NWAT_0109 | hypothetical conserved protein                                                 | * |   |   |
| 791 | 1296 | adenosylmethionine-8-amino-7-oxononanoate aminotransferase                     | TAO_1590 | NHAL_3353 | NOC_0122 | NWAT_0110 | adenosylmethionine-8-amino-7-oxononanoate aminotransferase                     | * | * | * |
| 792 | 638  | ribosomal RNA small subunit methyltransferase E                                | TAO_1589 | NHAL_3352 | NOC_0123 | NWAT_0111 | ribosomal RNA small subunit methyltransferase E                                | * | * | * |
| 793 | 1736 | -                                                                              | -        | NHAL_3351 | NOC_0124 | NWAT_0112 | chemotaxis protein cheW                                                        | * |   |   |
| 794 | 1947 | -                                                                              | -        | NHAL_3350 | NOC_0125 | NWAT_0113 | cheB methyltransferase                                                         | * |   |   |
| 795 | 2291 | -                                                                              | -        | NHAL_3349 | NOC_0126 | NWAT_0114 | cheA signal transduction histidine kinase                                      | * |   |   |
| 796 | 1919 | -                                                                              | -        | NHAL_3348 | NOC_0127 | NWAT_0115 | chemotaxis protein cheR                                                        | * |   |   |
| 797 | 2142 | -                                                                              | -        | NHAL_3347 | NOC_0128 | NWAT_0116 | methyl-accepting chemotaxis sensory transducer                                 | * |   |   |
| 798 | 1812 | -                                                                              | -        | NHAL_3346 | NOC_0129 | NWAT_0117 | chemotaxis protein cheW                                                        | * |   |   |
| 799 | 1674 | -                                                                              | -        | NHAL_3345 | NOC_0130 | NWAT_0118 | response regulator receiver protein                                            | * |   |   |
| 800 | 1724 | -                                                                              | -        | NHAL_3344 | NOC_0131 | NWAT_0119 | response regulator receiver protein                                            | * |   |   |
| 801 | 2007 | -                                                                              | -        | NHAL_3342 | NOC_0132 | NWAT_0121 | hypothetical protein                                                           | * |   |   |
| 802 | 1806 | -                                                                              | -        | NHAL_3341 | NOC_0133 | NWAT_0122 | ATP-binding protein                                                            | * |   |   |
| 803 | 1443 | glutamate-ammonia-ligase adenylyltransferase                                   | TAO_0091 | NHAL_0173 | NOC_0135 | NWAT_0124 | (glutamate--ammonia-ligase) adenylyltransferase                                | * | * | * |
| 804 | 1013 | branched-chain amino acid aminotransferase                                     | TAO_0092 | NHAL_0174 | NOC_0136 | NWAT_0125 | branched-chain amino acid aminotransferase                                     | * | * | * |
| 805 | 741  | hypothetical conserved protein                                                 | TAO_0093 | NHAL_0175 | NOC_0137 | NWAT_0126 | hypothetical protein                                                           | * | * | * |
| 806 | 497  | crossover junction endodeoxyribonuclease RuvC                                  | TAO_0094 | NHAL_0176 | NOC_0138 | NWAT_0127 | crossover junction endodeoxyribonuclease RuvC                                  | * | * | * |
| 807 | 486  | holliday junction DNA helicase RuvA                                            | TAO_0095 | NHAL_0177 | NOC_0139 | NWAT_0128 | holliday junction DNA helicase RuvA                                            | * | * | * |
| 808 | 994  | holliday junction DNA helicase RuvB                                            | TAO_0096 | NHAL_0178 | NOC_0140 | NWAT_0129 | holliday junction DNA helicase RuvB                                            | * | * | * |
| 809 | 375  | 4-hydroxybenzoyl-coA thioesterase                                              | TAO_0097 | NHAL_0179 | NOC_0141 | NWAT_0130 | Tol-pal system-associated acyl-coA thioesterase                                | * | * | * |
| 810 | 679  | MotA/TolQ/exbB proton channel family protein                                   | TAO_0098 | NHAL_0180 | NOC_0142 | NWAT_0131 | MotA/TolQ/exbB proton channel protein                                          | * | * | * |
| 811 | 376  | biopolymer transport protein exbD/TolR                                         | TAO_0099 | NHAL_0181 | NOC_0143 | NWAT_0132 | biopolymer transport protein exbD/TolR                                         | * | * | * |
| 812 | 426  | TonB family protein                                                            | TAO_0100 | NHAL_0182 | NOC_0144 | NWAT_0133 | TonB family protein                                                            | * | * | * |
| 813 | 1142 | Tol-Pal system beta propeller repeat-containing protein TolB                   | TAO_0101 | NHAL_0183 | NOC_0145 | NWAT_0134 | Tol-Pal system beta propeller repeat-containing protein TolB                   | * | * | * |
| 814 | 420  | peptidoglycan-associated lipoprotein                                           | TAO_0102 | NHAL_0184 | NOC_0146 | NWAT_0135 | peptidoglycan-associated lipoprotein                                           | * | * | * |
| 815 | 549  | Tol-Pal system protein YbgF                                                    | TAO_0103 | NHAL_0185 | NOC_0147 | NWAT_0136 | Tol-pal system protein YbgF                                                    | * | * | * |
| 816 | 681  | radical SAM domain-containing protein                                          | TAO_0104 | NHAL_0186 | NOC_0148 | NWAT_0138 | radical SAM domain-containing protein                                          | * | * | * |
| 817 | 618  | exsB protein                                                                   | TAO_0105 | NHAL_0187 | NOC_0149 | NWAT_0139 | exoenzyme S synthesis protein B                                                | * | * | * |
| 818 | 1583 | outer membrane efflux protein                                                  | TAO_1107 |           | NOC_0150 | NWAT_0140 | outer membrane efflux protein                                                  | * |   |   |
| 819 | 2787 | -                                                                              | -        |           | NOC_0152 | NWAT_0141 | RND family efflux transporter MFP subunit                                      | * |   |   |
| 820 | 2175 | metal transporter CzcA                                                         | TAO_1109 |           | NOC_0153 | NWAT_0142 | CzcA family heavy metal efflux pump                                            | * |   |   |
| 821 | 2734 | -                                                                              | -        |           | NOC_0154 | NWAT_0143 | methyltransferase type 11                                                      | * |   |   |
| 822 | 161  | hypothetical conserved protein                                                 | TAO_1634 | NHAL_0302 | NOC_0155 | NWAT_0144 | hypothetical protein                                                           | * | * | * |
| 823 | 1125 | hypothetical conserved protein                                                 | TAO_1635 | NHAL_0301 | NOC_0156 | NWAT_0145 | hypothetical protein                                                           | * | * | * |
| 824 | 1861 | -                                                                              | -        | NHAL_0300 | NOC_0157 | NWAT_0146 | hemolysin III family channel protein                                           | * |   |   |
| 825 | 1777 | -                                                                              | -        | NHAL_0280 | NOC_0158 | NWAT_0148 | CHRD domain-containing protein                                                 | * |   |   |
| 826 | 1123 | sodium/hydrogen exchanger                                                      | TAO_0086 | NHAL_3786 | NOC_0159 | NWAT_0150 | sodium/hydrogen exchanger                                                      | * | * | * |
| 827 | 2044 | -                                                                              | -        | NHAL_3781 | NOC_0161 | NWAT_0152 | succinylglutamate desuccinylase/aspartoacylase                                 | * |   |   |
| 828 | 1705 | -                                                                              | -        | NHAL_1776 | NOC_0162 | NWAT_0158 | membrane-flanked domain-containing protein                                     | * |   |   |
| 829 | 1326 | iron permease FTR1                                                             | TAO_1251 | NHAL_1782 | NOC_0164 | NWAT_0159 | iron permease FTR1                                                             | * | * | * |
| 830 | 1525 | -                                                                              | -        | NHAL_3024 | NOC_0168 | NWAT_0167 | hypothetical protein                                                           | * |   |   |

|     |      |                                                                   |          |           |          |           |                                                                   |   |   |   |
|-----|------|-------------------------------------------------------------------|----------|-----------|----------|-----------|-------------------------------------------------------------------|---|---|---|
| 831 | 496  | adenine phosphoribosyltransferase                                 | TAO_0861 | NHAL_2625 | NOC_0169 | NWAT_0168 | adenine phosphoribosyltransferase                                 | * | * | * |
| 832 | 487  | ABC transporter                                                   | TAO_0862 | NHAL_2627 | NOC_0170 | NWAT_0170 | ABC transporter                                                   | * | * | * |
| 833 | 1433 | DNA gyrase subunit A                                              | TAO_0863 | NHAL_2628 | NOC_0171 | NWAT_0171 | DNA gyrase subunit A                                              | * | * | * |
| 834 | 1099 | phosphoserine aminotransferase                                    | TAO_0864 | NHAL_2629 | NOC_0172 | NWAT_0172 | phosphoserine aminotransferase                                    | * | * | * |
| 835 | 1089 | D-isomer specific 2-hydroxyacid dehydrogenase NAD-binding protein | TAO_0865 | NHAL_2630 | NOC_0173 | NWAT_0173 | D-isomer specific 2-hydroxyacid dehydrogenase NAD-binding protein | * | * | * |
| 836 | 1028 | chorismate mutase                                                 | TAO_0866 | NHAL_2631 | NOC_0174 | NWAT_0174 | chorismate mutase                                                 | * | * | * |
| 837 | 1022 | histidinol-phosphate aminotransferase                             | TAO_0867 | NHAL_2632 | NOC_0175 | NWAT_0175 | histidinol-phosphate aminotransferase                             | * | * | * |
| 838 | 798  | prephenate dehydrogenase                                          | TAO_0868 | NHAL_2633 | NOC_0176 | NWAT_0176 | prephenate dehydrogenase                                          | * | * | * |
| 839 | 1161 | 3-phosphoshikimate 1-carboxyvinyltransferase                      | TAO_0869 | NHAL_2634 | NOC_0177 | NWAT_0177 | 3-phosphoshikimate 1-carboxyvinyltransferase                      | * | * | * |
| 840 | 623  | HAD-superfamily hydrolase                                         | TAO_0870 | NHAL_2635 | NOC_0178 | NWAT_0178 | HAD-superfamily hydrolase                                         | * | * | * |
| 841 | 567  | cytidylate kinase                                                 | TAO_0871 | NHAL_2636 | NOC_0179 | NWAT_0179 | cytidylate kinase                                                 | * | * | * |
| 842 | 1348 | 30S ribosomal protein S1                                          | TAO_0872 | NHAL_2637 | NOC_0180 | NWAT_0180 | 30S ribosomal protein S1                                          | * | * | * |
| 843 | 253  | integration host factor subunit beta                              | TAO_0873 | NHAL_2638 | NOC_0181 | NWAT_0181 | integration host factor subunit beta                              | * | * | * |
| 844 | 298  | hypothetical conserved protein                                    | TAO_0874 | NHAL_2639 | NOC_0182 | NWAT_0182 | hypothetical protein                                              | * | * | * |
| 845 | 931  | RNA polymerase sigma factor                                       | TAO_0875 | NHAL_2640 | NOC_0183 | NWAT_0183 | RpoD subfamily RNA polymerase sigma 70 subunit                    | * | * | * |
| 846 | 382  | 4Fe-4S ferredoxin                                                 | TAO_0876 | NHAL_2641 | NOC_0184 | NWAT_0184 | 4Fe-4S ferredoxin                                                 | * | * | * |
| 847 | 1610 | hypothetical conserved protein                                    | TAO_0877 | NHAL_2642 |          | NWAT_0185 | hypothetical conserved protein                                    | * |   |   |
| 848 | 1074 | tetratricopeptide repeat protein                                  | TAO_0878 | NHAL_2643 | NOC_0185 | NWAT_0186 | tetratricopeptide repeat protein                                  | * | * | * |
| 849 | 297  | arsenate reductase                                                | TAO_0879 | NHAL_2644 | NOC_0186 | NWAT_0187 | arsenate reductase                                                | * | * | * |
| 850 | 585  | NAD(P)H quinone oxidoreductase                                    | TAO_0880 | NHAL_2645 | NOC_0187 | NWAT_0188 | flavoprotein WrbA                                                 | * | * | * |
| 851 | 710  | biotin/acetyl-coA-carboxylase ligase                              | TAO_0881 | NHAL_2646 | NOC_0188 | NWAT_0189 | biotin/acetyl-coA-carboxylase ligase                              | * | * | * |
| 852 | 721  | pantothenate kinase type III, coaX-like protein                   | TAO_0882 | NHAL_2647 | NOC_0189 | NWAT_0190 | pantothenate kinase type III, coaX-like protein                   | * | * | * |
| 853 | 1114 | permease                                                          | TAO_0883 | NHAL_2648 | NOC_0190 | NWAT_0191 | permease                                                          | * | * | * |
| 854 | 781  | thiosulfate sulfurtransferase                                     | TAO_0884 | NHAL_2649 | NOC_0191 | NWAT_0192 | rhodanese domain-containing protein                               | * | * | * |
| 855 | 1909 | -                                                                 | -        | NHAL_2650 | NOC_0192 | NWAT_0193 | calcineurin phosphoesterase domain-containing protein             | * |   |   |
| 856 | 1695 | -                                                                 | -        | NHAL_2651 | NOC_0193 | NWAT_0194 | NUDIX hydrolase                                                   | * |   |   |
| 857 | 1799 | -                                                                 | -        | NHAL_0745 | NOC_0955 | NWAT_2078 | hypothetical protein                                              | * |   |   |
| 858 | 813  | YicC domain-containing protein                                    | TAO_0592 | NHAL_0748 | NOC_0956 | NWAT_2077 | YicC domain-containing protein                                    | * | * | * |
| 859 | 2084 | -                                                                 | -        | NHAL_1536 | NOC_0960 | NWAT_2075 | sodium/hydrogen exchanger                                         | * |   |   |
| 860 | 2277 | -                                                                 | -        | NHAL_1535 | NOC_0961 | NWAT_2074 | hypothetical protein                                              | * |   |   |
| 861 | 2016 | -                                                                 | -        | NHAL_1532 | NOC_0962 | NWAT_2073 | histone deacetylase superfamily protein                           | * |   |   |
| 862 | 1869 | -                                                                 | -        | NHAL_2654 | NOC_0964 | NWAT_2072 | stage II sporulation E family protein                             | * |   |   |
| 863 | 2141 | -                                                                 | -        | NHAL_2948 | NOC_0965 | NWAT_2071 | FAD-dependent pyridine nucleotide-disulfide oxidoreductase        | * |   |   |
| 864 | 2709 | -                                                                 | -        |           | NOC_0968 | NWAT_2069 | hypothetical protein                                              | * |   |   |
| 865 | 2637 | -                                                                 | -        |           | NOC_0969 | NWAT_2068 | hypothetical protein                                              | * |   |   |
| 866 | 637  | RnfABCDGE type electron transport complex subunit A               | TAO_0993 | NHAL_2750 | NOC_0970 | NWAT_2067 | RnfABCDGE type electron transport complex subunit A               | * | * | * |
| 867 | 1411 | methionyl-tRNA synthetase                                         | TAO_0994 | NHAL_2751 | NOC_0971 | NWAT_2066 | methionyl-tRNA synthetase                                         | * | * | * |
| 868 | 1071 | ATP-binding protein                                               | TAO_0997 | NHAL_2752 | NOC_0972 | NWAT_2065 | ATPase-like protein                                               | * | * | * |
| 869 | 172  | hypothetical conserved protein                                    | TAO_1258 | NHAL_2757 | NOC_0975 | NWAT_2060 | hypothetical protein                                              | * | * | * |
| 870 | 1666 | -                                                                 | -        | NHAL_2759 | NOC_0976 | NWAT_2059 | hypothetical protein                                              | * |   |   |
| 871 | 1881 | -                                                                 | -        | NHAL_1518 | NOC_0977 | NWAT_2058 | VacJ-like lipoprotein                                             | * |   |   |
| 872 | 2114 | -                                                                 | -        | NHAL_1519 | NOC_0978 | NWAT_2057 | hypothetical protein                                              | * |   |   |
| 873 | 1528 | -                                                                 | -        | NHAL_3542 | NOC_0979 | NWAT_2056 | hypothetical protein                                              | * |   |   |
| 874 | 1587 | -                                                                 | -        | NHAL_1597 | NOC_0980 | NWAT_2055 | hypothetical protein                                              | * |   |   |
| 875 | 2069 | -                                                                 | -        | NHAL_2960 | NOC_0982 | NWAT_2054 | geranylgeranyl reductase                                          | * |   |   |
| 876 | 1995 | -                                                                 | -        | NHAL_2962 | NOC_0983 | NWAT_2053 | ribose-phosphate pyrophosphokinase                                | * |   |   |
| 877 | 1875 | -                                                                 | -        | NHAL_2963 | NOC_0984 | NWAT_2052 | hypothetical protein                                              | * |   |   |
| 878 | 1800 | -                                                                 | -        | NHAL_2965 | NOC_0985 | NWAT_2051 | methionine-R-sulfoxide reductase                                  | * |   |   |
| 879 | 1722 | -                                                                 | -        | NHAL_2966 | NOC_0986 | NWAT_2050 | hypothetical protein                                              | * |   |   |
| 880 | 1412 | DNA repair protein                                                | TAO_0980 | NHAL_2968 | NOC_0987 | NWAT_2049 | putative DNA repair protein                                       | * | * | * |

|     |      |                                                                         |          |           |          |           |                                                                        |   |   |   |
|-----|------|-------------------------------------------------------------------------|----------|-----------|----------|-----------|------------------------------------------------------------------------|---|---|---|
| 881 | 1451 | UvrD/REP helicase                                                       | TAO_0981 | NHAL_2969 | NOC_0988 | NWAT_2048 | UvrD/REP helicase                                                      | * | * | * |
| 882 | 1550 | hypothetical conserved protein                                          | TAO_0982 | NHAL_2970 |          | NWAT_2047 | hypothetical conserved protein                                         | * |   |   |
| 883 | 547  | alkyl hydroperoxide reductase/ thiol specific antioxidant/ mal allergen | TAO_0983 | NHAL_2971 | NOC_0989 | NWAT_2046 | alkyl hydroperoxide reductase/thiol specific antioxidant/ mal allergen | * | * | * |
| 884 | 1175 | pyruvate kinase                                                         | TAO_0985 | NHAL_2972 | NOC_0990 | NWAT_2045 | pyruvate kinase                                                        | * | * | * |
| 885 | 896  | alpha/beta hydrolase fold protein                                       | TAO_0986 | NHAL_2973 | NOC_0991 | NWAT_2044 | alpha/beta hydrolase fold protein                                      | * | * | * |
| 886 | 2038 | -                                                                       | -        | NHAL_2974 | NOC_0992 | NWAT_2043 | hypothetical protein                                                   | * |   |   |
| 887 | 1697 | -                                                                       | -        | NHAL_2975 | NOC_0993 | NWAT_2042 | hypothetical protein                                                   | * |   |   |
| 888 | 1941 | -                                                                       | -        | NHAL_2976 | NOC_0994 | NWAT_2041 | type 11 methyltransferase                                              | * |   |   |
| 889 | 2251 | -                                                                       | -        | NHAL_2977 | NOC_0995 | NWAT_2040 | helicase, RecD/TraA family                                             | * |   |   |
| 890 | 755  | endonuclease/exonuclease/phosphatase                                    | TAO_1099 | NHAL_2983 | NOC_0998 | NWAT_2037 | endonuclease/exonuclease/phosphatase                                   | * | * | * |
| 891 | 2770 | -                                                                       | -        | NHAL_2175 | NOC_1947 |           | hypothetical protein                                                   | * |   |   |
| 892 | 1953 | UbiA prenyltransferase                                                  | TAO_1198 | NHAL_2174 | NOC_1948 |           | UbiA prenyltransferase                                                 | * |   |   |
| 893 | 1823 | HAD-superfamily hydrolase                                               | TAO_1199 | NHAL_2173 | NOC_1949 |           | HAD-superfamily hydrolase                                              | * |   |   |
| 894 | 1885 | short-chain dehydrogenase/reductase SDR                                 | TAO_1200 | NHAL_2172 | NOC_1950 |           | short-chain dehydrogenase/reductase SDR                                | * |   |   |
| 895 | 2090 | FAD linked oxidase domain-containing protein                            | TAO_1201 | NHAL_2171 | NOC_1951 |           | FAD linked oxidase domain-containing protein                           | * |   |   |
| 896 | 2614 | -                                                                       | -        | NHAL_2170 | NOC_1952 |           | hypothetical protein                                                   | * |   |   |
| 897 | 2825 | -                                                                       | -        | NHAL_2169 | NOC_1953 |           | hypothetical protein                                                   | * |   |   |
| 898 | 1872 | -                                                                       | -        | NHAL_2168 | NOC_1954 | NWAT_1751 | hypothetical protein                                                   | * |   |   |
| 899 | 769  | O-antigen polymerase                                                    | TAO_1204 | NHAL_2167 | NOC_1955 | NWAT_1752 | O-antigen polymerase                                                   | * | * | * |
| 900 | 2178 | -                                                                       | -        | NHAL_2166 | NOC_1956 | NWAT_1753 | acyl-coA ligase (AMP-forming), exosortase system type 1 associated     | * |   |   |
| 901 | 2097 | -                                                                       | -        | NHAL_2165 | NOC_1957 | NWAT_1754 | pyridoxal-dependent decarboxylase, exosortase system type 1 associated | * |   |   |
| 902 | 2081 | -                                                                       | -        | NHAL_2164 | NOC_1958 | NWAT_1755 | hypothetical protein                                                   | * |   |   |
| 903 | 1960 | -                                                                       | -        | NHAL_2163 | NOC_1959 | NWAT_1756 | hydrolase, exosortase system type 1 associated                         | * |   |   |
| 904 | 1888 | -                                                                       | -        | NHAL_3215 | NOC_1962 | NWAT_1757 | hydrolase, exosortase system type 1 associated                         | * |   |   |
| 905 | 1578 | -                                                                       | -        | NHAL_3216 | NOC_1963 | NWAT_1758 | hypothetical protein                                                   | * |   |   |
| 906 | 2691 | -                                                                       | -        | NHAL_3217 |          | NWAT_1759 | hypothetical protein                                                   | * |   |   |
| 907 | 2386 | -                                                                       | -        | NHAL_3218 |          | NWAT_1760 | hypothetical protein                                                   | * |   |   |
| 908 | 979  | asparagine synthase                                                     | TAO_1210 | NHAL_3222 | NOC_1965 | NWAT_1762 | asparagine synthase                                                    | * | * | * |
| 909 | 164  | hypothetical conserved protein                                          | TAO_1208 | NHAL_3223 | NOC_1966 | NWAT_1763 | TPR repeat-containing protein                                          | * | * | * |
| 910 | 552  | polysaccharide deacetylase                                              | TAO_1212 | NHAL_3226 | NOC_1967 | NWAT_1764 | polysaccharide deacetylase                                             | * | * | * |
| 911 | 2235 | -                                                                       | -        | NHAL_3227 | NOC_1968 | NWAT_1765 | methyltransferase type 11                                              | * |   |   |
| 912 | 2248 | -                                                                       | -        | NHAL_3229 | NOC_1969 | NWAT_1766 | heparinase II/III family protein                                       | * |   |   |
| 913 | 2037 | -                                                                       | -        | NHAL_3230 | NOC_1970 | NWAT_1767 | kelch repeat-containing protein                                        | * |   |   |
| 914 | 1149 | capsular polysaccharide biosynthesis protein capK                       | TAO_1216 | NHAL_3231 | NOC_1971 | NWAT_1768 | capsular polysaccharide biosynthesis protein capK                      | * | * | * |
| 915 | 2102 | -                                                                       | -        | NHAL_3232 | NOC_1972 | NWAT_1769 | group 1 glycosyl transferase                                           | * |   |   |
| 916 | 883  | group 1 glycosyl transferase                                            | TAO_1218 | NHAL_3233 | NOC_1973 | NWAT_1770 | group 1 glycosyl transferase                                           | * | * | * |
| 917 | 2268 | -                                                                       | -        | NHAL_3234 | NOC_1974 | NWAT_1771 | hypothetical protein                                                   | * |   |   |
| 918 | 1394 | exosortase 1 system-associated amidotransferase 1                       | TAO_1219 | NHAL_3235 | NOC_1975 | NWAT_1772 | exosortase 1 system-associated amidotransferase 1                      | * | * | * |
| 919 | 1094 | UDP-N-acetylglucosamine 2-epimerase                                     | TAO_1220 | NHAL_3236 | NOC_1976 | NWAT_1773 | UDP-N-acetylglucosamine 2-epimerase                                    | * | * | * |
| 920 | 1037 | sugar transferase                                                       | TAO_1221 | NHAL_3237 | NOC_1977 | NWAT_1774 | sugar transferase                                                      | * | * | * |
| 921 | 1224 | exosortase 1                                                            | TAO_1222 | NHAL_3238 | NOC_1978 | NWAT_1775 | exosortase 1                                                           | * | * | * |
| 922 | 1103 | sugar transferase                                                       | TAO_1223 | NHAL_3239 | NOC_1979 | NWAT_1776 | sugar transferase                                                      | * | * | * |
| 923 | 1101 | peptidoglycan bridge formation protein FemAB                            | TAO_1224 | NHAL_3240 | NOC_1980 | NWAT_1777 | peptidoglycan bridge formation protein FemAB                           | * | * | * |
| 924 | 900  | polysaccharide deacetylase                                              | TAO_1225 | NHAL_3241 | NOC_1981 | NWAT_1778 | polysaccharide deacetylase family protein                              | * | * | * |
| 925 | 947  | hypothetical conserved protein                                          | TAO_1226 | NHAL_3242 | NOC_1982 | NWAT_1779 | PEP-CTERM system associated protein                                    | * | * | * |
| 926 | 594  | protein-tyrosine kinase                                                 | TAO_1227 | NHAL_3243 | NOC_1983 | NWAT_1780 | protein-tyrosine kinase                                                | * | * | * |
| 927 | 1188 | polysaccharide chain length determinant protein                         | TAO_1228 | NHAL_3244 | NOC_1984 | NWAT_1781 | polysaccharide chain length determinant protein                        | * | * | * |
| 928 | 541  | sugar ABC transporter substrate-binding protein                         | TAO_1229 | NHAL_3245 | NOC_1985 | NWAT_1782 | polysaccharide export protein                                          | * | * | * |
| 929 | 1389 | PEP-CTERM system TPR-repeat lipoprotein                                 | TAO_1231 | NHAL_3247 | NOC_1987 | NWAT_1783 | PEP-CTERM system TPR-repeat lipoprotein                                | * | * | * |

|     |      |                                                                          |                      |                        |          |              |                                                                           |   |   |   |
|-----|------|--------------------------------------------------------------------------|----------------------|------------------------|----------|--------------|---------------------------------------------------------------------------|---|---|---|
| 930 | 2725 | -                                                                        | -                    | NHAL_3254              | NOC_1992 |              | <b>RND family efflux transporter MFP subunit</b>                          | * |   |   |
| 931 | 2897 | -                                                                        | -                    | NHAL_3255              | NOC_1993 |              | <b>acriflavin resistance protein</b>                                      | * |   |   |
| 932 | 1498 | <b>nitroreductase family protein</b>                                     | TAO_1232<br>TAO_1234 | NHAL_3256              | NOC_1994 |              | UBA/THIF-type NAD/FAD binding protein                                     | * |   |   |
| 933 | 1847 | -                                                                        | -                    | NHAL_3258              | NOC_1995 | NWAT_1790    | <b>hypothetical protein</b>                                               | * |   |   |
| 934 | 531  | <b>hypothetical conserved protein</b>                                    | TAO_1237             | NHAL_3259              | NOC_1996 | NWAT_1791    | hypothetical protein                                                      | * | * | * |
| 935 | 1218 | <b>Fis family two component sigma54 specific transcriptional</b>         | TAO_1238             | NHAL_3269              | NOC_1997 | NWAT_1794    | Fis family two component sigma54 specific transcriptional regulator       | * | * | * |
| 936 | 1376 | <b>PEP-CTERM system histidine kinase</b>                                 | TAO_1239             | NHAL_3270              | NOC_1998 | NWAT_1795    | PEP-CTERM system histidine kinase                                         | * | * | * |
| 937 | 1248 | <b>sugar transferase</b>                                                 | TAO_1240             | NHAL_3271              | NOC_1999 | NWAT_1796    | sugar transferase                                                         | * | * | * |
| 938 | 1721 | -                                                                        | -                    | NHAL_3272              | NOC_2000 | NWAT_1798    | <b>cytochrome C class I</b>                                               | * |   |   |
| 939 | 1385 | <b>dihydroxy-acid dehydratase</b>                                        | TAO_1573             | NHAL_3274              | NOC_2001 | NWAT_1799    | dihydroxy-acid dehydratase                                                | * | * | * |
| 940 | 1390 | <b>ATP-dependent DNA helicase Rep</b>                                    | TAO_1574             | NHAL_3275              | NOC_2002 | NWAT_1800    | ATP-dependent DNA helicase Rep                                            | * | * | * |
| 941 | 1286 | <b>magnesium chelatase, competence related protein (comM)</b>            | TAO_1575             | NHAL_3276              | NOC_2003 | NWAT_1801    | Mg chelatase subunit chlI                                                 | * | * | * |
| 942 | 206  | <b>hypothetical conserved protein</b>                                    | TAO_1576             | NHAL_3277              | NOC_2004 | NWAT_1802    | hypothetical protein                                                      | * | * | * |
| 943 | 96   | <b>hypothetical conserved protein</b>                                    | TAO_1577             | NHAL_3279              | NOC_2005 | NWAT_1803    | hypothetical protein                                                      | * | * | * |
| 944 | 1172 | <b>amino-acid N-acetyltransferase</b>                                    | TAO_1581             | NHAL_3281              | NOC_2013 | NWAT_1088    | amino-acid N-acetyltransferase                                            | * | * | * |
| 945 | 1293 | <b>aspartyl/glutamyl-tRNA(Asn/Gln) amidotransferase subunit B</b>        | TAO_1587             | NHAL_3282              | NOC_2014 | NWAT_1087    | glutamyl-tRNA(Gln) amidotransferase subunit B                             | * | * | * |
| 946 | 1255 | <b>UDP-glucose 6-dehydrogenase</b>                                       | TAO_1586             | NHAL_3283              | NOC_2015 | NWAT_1086    | UDP-glucose 6-dehydrogenase                                               | * | * | * |
| 947 | 911  | <b>secretion ATPase</b>                                                  | TAO_1585             | NHAL_3284              | NOC_2016 | NWAT_1082    | secretion ATPase                                                          | * | * | * |
| 948 | 654  | <b>haloacid dehalogenase-like (HAD) superfamily protein</b>              | TAO_1584             | NHAL_3285              | NOC_2017 | NWAT_1081    | HAD-superfamily hydrolase                                                 | * | * | * |
| 949 | 94   | <b>diadenosine tetraphosphate (Ap4A) hydrolase</b>                       | TAO_1583             | NHAL_3286<br>NHAL_3289 | NOC_2018 | NWAT_1080    | NUDIX hydrolase                                                           | * | * |   |
| 950 | 1347 | <b>peptide chain release factor 3</b>                                    | TAO_0741             | NHAL_2825              | NOC_2019 | NWAT_1079    | peptide chain release factor 3                                            | * | * | * |
| 951 | 118  | -                                                                        | -                    | NHAL_2824              | NOC_2020 | NWAT_1078    | <b>hypothetical protein</b>                                               | * |   |   |
| 952 | 2893 | -                                                                        | -                    | -                      | NOC_2021 | NWAT_1077    | <b>PAS/PAC sensor(s)-containing diguanylate cyclase/phosphodiesterase</b> | * |   |   |
| 953 | 518  | <b>ribonuclease H</b>                                                    | TAO_0739             | NHAL_2814              | NOC_2022 | NWAT_1076    | ribonuclease H                                                            | * | * | * |
| 954 | 1098 | <b>3,4-dihydroxy-2-butanone 4-phosphate synthase</b>                     | TAO_0738             | NHAL_2813              | NOC_2023 | NWAT_1075    | 3,4-dihydroxy-2-butanone 4-phosphate synthase                             | * | * | * |
| 955 | 479  | <b>riboflavin synthase subunit alpha</b>                                 | TAO_0737             | NHAL_2812              | NOC_2024 | NWAT_1074    | riboflavin synthase subunit alpha                                         | * | * | * |
| 956 | 1057 | <b>riboflavin biosynthesis protein ribD</b>                              | TAO_0736             | NHAL_2811              | NOC_2025 | NWAT_1073    | riboflavin biosynthesis protein ribD                                      | * | * | * |
| 957 | 1793 | -                                                                        | -                    | NHAL_2810              | NOC_2026 | NWAT_1072    | <b>ATP-cone domain-containing protein</b>                                 | * |   |   |
| 958 | 1212 | <b>glycine hydroxymethyltransferase</b>                                  | TAO_0735             | NHAL_2809              | NOC_2027 | NWAT_1071    | glycine hydroxymethyltransferase                                          | * | * | * |
| 959 | 960  | <b>methyltransferase</b>                                                 | TAO_0734             | NHAL_2808              | NOC_2028 | NWAT_1070    | methyltransferase                                                         | * | * | * |
| 960 | 1234 | <b>formylglycine-generating sulfatase enzyme</b>                         | TAO_0733             | NHAL_2807              | NOC_2029 | NWAT_1069    | formylglycine-generating sulfatase enzyme                                 | * | * | * |
| 961 | 329  | <b>hypothetical conserved protein</b>                                    | TAO_0732             | NHAL_2803              | NOC_2030 | NWAT_1068    | hypothetical protein                                                      | * | * | * |
| 962 | 926  | <b>D-isomer specific 2-hydroxyacid dehydrogenase NAD-binding protein</b> | TAO_0731             | NHAL_2802              | NOC_2032 | NWAT_1067    | D-isomer specific 2-hydroxyacid dehydrogenase NAD-binding protein         | * | * | * |
| 963 | 2547 | -                                                                        | -                    | -                      | NOC_2033 | NWAT_1066(3) | <b>hypothetical protein</b>                                               | * |   |   |
| 964 | 2527 | -                                                                        | -                    | -                      | NOC_2034 | NWAT_1066(1) | <b>hypothetical protein</b>                                               | * |   |   |
| 965 | 845  | <b>riboflavin biosynthesis protein ribF</b>                              | TAO_0730             | NHAL_2800              | NOC_2035 | NWAT_1064    | riboflavin biosynthesis protein ribF                                      | * | * | * |
| 966 | 198  | <b>exodeoxyribonuclease VII small subunit</b>                            | TAO_0729             | NHAL_2799              | NOC_2036 | NWAT_1063    | exodeoxyribonuclease VII small subunit                                    | * | * | * |
| 967 | 831  | <b>polyprenyl synthetase</b>                                             | TAO_0728             | NHAL_2798              | NOC_2037 | NWAT_1062    | polyprenyl synthetase                                                     | * | * | * |
| 968 | 296  | <b>6-pyruvoyl tetrahydrobiopterin synthase</b>                           | TAO_0727             | NHAL_2797              | NOC_2038 | NWAT_1061    | bifunctional 6-pyruvoyl tetrahydropterin synthase/hypothetical protein    | * | * | * |
| 969 | 818  | <b>GTP cyclohydrolase</b>                                                | TAO_0726             | NHAL_2796              | NOC_2039 | NWAT_1060    | GTP cyclohydrolase                                                        | * | * | * |
| 970 | 1104 | <b>tRNA (5-methylaminomethyl-2-thiouridylate)-methyltransferase</b>      | TAO_0949             | NHAL_2793              | NOC_2040 | NWAT_1059    | tRNA (5-methylaminomethyl-2-thiouridylate)-methyltransferase              | * | * | * |
| 971 | 537  | <b>High frequency lysogenization protein hflD</b>                        | TAO_0948             | NHAL_2792              | NOC_2041 | NWAT_1058    | high frequency lysogenization protein hflD                                | * | * | * |
| 972 | 1939 | -                                                                        | -                    | NHAL_2791              | NOC_2042 | NWAT_1057    | <b>OmpA/MotB domain-containing protein</b>                                | * |   |   |
| 973 | 1662 | -                                                                        | -                    | NHAL_2790              | NOC_2043 | NWAT_1056    | <b>hypothetical protein</b>                                               | * |   |   |
| 974 | 2030 | -                                                                        | -                    | NHAL_1062              | NOC_1548 | NWAT_1587    | <b>succinylglutamate desuccinylase/aspartoacylase</b>                     | * |   |   |
| 975 | 1996 | -                                                                        | -                    | NHAL_1063              | NOC_1549 | NWAT_1586    | <b>RimK family alpha-L-glutamate ligase</b>                               | * |   |   |
| 976 | 1765 | -                                                                        | -                    | NHAL_1064              | NOC_1550 | NWAT_1585    | <b>hypothetical protein</b>                                               | * |   |   |
| 977 | 2892 | -                                                                        | -                    | -                      | NOC_1553 | NWAT_1579    | <b>amylo-alpha-1,6-glucosidase</b>                                        | * |   |   |
| 978 | 1503 | -                                                                        | -                    | NHAL_0665              | NOC_1554 | NWAT_1578    | <b>group 1 glycosyl transferase</b>                                       | * |   |   |

|      |      |                                                             |          |           |             |              |                                                                        |   |   |   |
|------|------|-------------------------------------------------------------|----------|-----------|-------------|--------------|------------------------------------------------------------------------|---|---|---|
| 979  | 1698 | -                                                           | -        | NHAL_1068 | NOC_1557    | NWAT_1575    | zinc finger DksA/TraR C4-type                                          | * |   |   |
| 980  | 1484 | major facilitator superfamily transporter                   | TAO_0460 | -         | NOC_1559    | NWAT_1574    | major facilitator superfamily transporter                              | * |   |   |
| 981  | 2003 | -                                                           | -        | NHAL_2706 | NOC_1560    | NWAT_1573    | Ectoine hydroxylase                                                    | * |   |   |
| 982  | 2133 | -                                                           | -        | NHAL_2707 | NOC_1561    | NWAT_1572    | diaminobutyrate--2-oxoglutarate aminotransferase                       | * |   |   |
| 983  | 1763 | -                                                           | -        | NHAL_2708 | NOC_1562    | NWAT_1571    | L-2,4-diaminobutyric acid acetyltransferase                            | * |   |   |
| 984  | 1699 | -                                                           | -        | NHAL_2115 | NOC_1573    | NWAT_1567    | heat shock protein Hsp20                                               | * |   |   |
| 985  | 2357 | -                                                           | -        | -         | NOC_1574    | NWAT_1566    | hypothetical protein                                                   | * |   |   |
| 986  | 2171 | -                                                           | -        | NHAL_2710 | NOC_1575    | NWAT_1565    | sodium/proline symporter                                               | * |   |   |
| 987  | 2651 | -                                                           | -        | -         | NOC_1577    | NWAT_1558    | hypothetical protein                                                   | * |   |   |
| 988  | 2848 | -                                                           | -        | -         | NOC_1578    | NWAT_1557    | L-lactate permease                                                     | * |   |   |
| 989  | 2703 | -                                                           | -        | -         | NOC_1580    | NWAT_1554    | hypothetical protein                                                   | * |   |   |
| 990  | 2679 | -                                                           | -        | -         | NOC_1581    | NWAT_1553    | hypothetical protein                                                   | * |   |   |
| 991  | 2262 | -                                                           | -        | NHAL_1352 | NOC_1582    | NWAT_1551    | malate dehydrogenase                                                   | * |   |   |
| 992  | 1460 | pyridine nucleotide-disulfide oxidoreductase                | TAO_1119 | NHAL_1366 | NOC_1583    | NWAT_1541    | pyridine nucleotide-disulfide oxidoreductase                           | * | * | * |
| 993  | 1893 | -                                                           | -        | NHAL_1368 | NOC_1584    | NWAT_1540    | hypothetical protein                                                   | * |   |   |
| 994  | 2197 | -                                                           | -        | NHAL_1369 | NOC_1585    | NWAT_1539    | DNA mismatch repair protein MutS domain-containing protein             | * |   |   |
| 995  | 702  | oxidoreductase FAD/NAD(P)-binding domain-containing protein | TAO_1118 | NHAL_1370 | NOC_1586    | NWAT_1538    | oxidoreductase FAD/NAD(P)-binding domain-containing protein            | * | * | * |
| 996  | 2460 | -                                                           | -        | -         | NOC_1588    | NWAT_1536    | hypothetical protein                                                   | * |   |   |
| 997  | 2626 | -                                                           | -        | -         | NOC_1589    | NWAT_1535    | hypothetical protein                                                   | * |   |   |
| 998  | 2627 | -                                                           | -        | -         | NOC_1590    | NWAT_1534    | hypothetical protein                                                   | * |   |   |
| 999  | 2597 | -                                                           | -        | -         | NOC_1591    | NWAT_1533    | hypothetical protein                                                   | * |   |   |
| 1000 | 2755 | -                                                           | -        | -         | NOC_1592    | NWAT_1532    | hypothetical protein                                                   | * |   |   |
| 1001 | 1669 | -                                                           | -        | NHAL_0811 | NOC_1595    | NWAT_1529    | hypothetical protein                                                   | * |   |   |
| 1002 | 869  | tRNA 2-thiocytidine biosynthesis protein TtcA               | TAO_1143 | NHAL_2912 | NOC_1596    | NWAT_1528    | PP-loop domain-containing protein                                      | * | * | * |
| 1003 | 2120 | -                                                           | -        | NHAL_1891 | NOC_1601    | NWAT_1526    | PAS/PAC sensor-containing diguanylate cyclase                          | * |   |   |
| 1004 | 207  | -                                                           | -        | NHAL_3179 | NOC_1602    | NWAT_1525    | hypothetical protein                                                   | * |   |   |
| 1005 | 2180 | -                                                           | -        | NHAL_3178 | NOC_1603    | NWAT_1524    | glutamate synthase, NADH/NADPH, small subunit                          | * |   |   |
| 1006 | 2294 | -                                                           | -        | NHAL_3177 | NOC_1604    | NWAT_1523    | glutamate synthase (ferredoxin)                                        | * |   |   |
| 1007 | 470  | PEBP family protein                                         | TAO_0965 | NHAL_3176 | NOC_1605    | NWAT_1520    | PEBP family protein                                                    | * | * | * |
| 1008 | 1309 | glutamate/cysteine ligase                                   | TAO_0967 | NHAL_3173 | NOC_1606    | NWAT_1519    | glutamate/cysteine ligase                                              | * | * | * |
| 1009 | 1752 | -                                                           | -        | NHAL_3172 | NOC_1607    | NWAT_1518    | sulfate transporter/antisigma-factor antagonist STAS                   | * |   |   |
| 1010 | 1575 | hypothetical conserved protein                              | TAO_0968 | NHAL_3171 | -           | NWAT_1517    | hypothetical conserved protein                                         | * |   |   |
| 1011 | 1186 | glutathione-disulfide reductase                             | TAO_0969 | NHAL_3170 | NOC_1608    | NWAT_1516    | glutathione-disulfide reductase                                        | * | * | * |
| 1012 | 2273 | -                                                           | -        | NHAL_3169 | NOC_1609    | NWAT_1515    | GAF/PAS/PAC sensor(s)-containing diguanylate cyclase/phosphodiesterase | * |   |   |
| 1013 | 2104 | hypothetical conserved protein                              | TAO_0970 | -         | NOC_1610    | NWAT_1514    | hypothetical conserved protein                                         | * |   |   |
| 1014 | 578  | hypothetical conserved protein                              | TAO_0971 | NHAL_3168 | NOC_1611    | NWAT_1513    | hypothetical protein                                                   | * | * | * |
| 1015 | 1557 | -                                                           | -        | NHAL_3036 | NOC_1614    | NWAT_1511    | hypothetical protein                                                   | * |   |   |
| 1016 | 1577 | -                                                           | -        | NHAL_3038 | NOC_1616    | NWAT_1510    | 2-methylcitrate dehydratase                                            | * |   |   |
| 1017 | 2884 | -                                                           | -        | -         | NOC_1617    | NWAT_1509    | glycoside hydrolase 15-like protein                                    | * |   |   |
| 1018 | 2885 | -                                                           | -        | -         | NOC_1618    | NWAT_1508    | lysine--tRNA ligase                                                    | * |   |   |
| 1019 | 961  | ATPase AAA                                                  | TAO_1064 | NHAL_3077 | NOC_1621    | NWAT_1505    | ATPase AAA                                                             | * | * | * |
| 1020 | 1277 | Fis family transcriptional regulator                        | TAO_1029 | NHAL_3135 | NOC_1623    | NWAT_1504    | Fis family transcriptional regulator                                   | * | * | * |
| 1021 | 1166 | ATP-binding region ATPase domain-containing protein         | TAO_1030 | NHAL_3134 | NOC_1624    | NWAT_1503    | ATP-binding region ATPase domain-containing protein                    | * | * | * |
| 1022 | 315  | hypothetical conserved protein                              | TAO_1031 | NHAL_3133 | NOC_1625    | NWAT_1502    | lipoprotein                                                            | * | * | * |
| 1023 | 67   | sulfate permease and related transporter                    | TAO_0789 | NHAL_3132 | NOC_1626    | NWAT_1501    | sulfate transporter                                                    | * | * | * |
| 1024 | 1239 | fumarate hydratase                                          | TAO_1032 | NHAL_3131 | NOC_1627    | NWAT_1500    | fumarate hydratase, class II                                           | * | * | * |
| 1025 | 2711 | -                                                           | -        | -         | NOC_1631    | NWAT_1498    | putative Crp/Fnr family transcriptional regulator                      | * |   |   |
| 1026 | 2613 | -                                                           | -        | -         | NOC_1632    | NWAT_1497    | LuxR family two component transcriptional regulator                    | * |   |   |
| 1027 | 816  | thiazole synthase                                           | TAO_1025 | NHAL_3159 | NOC_1633(2) | NWAT_1496(2) | bifunctional sulfur carrier protein/thiazole synthase                  | * | * | * |
| 1028 | 395  | hypothetical conserved protein                              | TAO_0004 | NHAL_0008 | NOC_0020    | NWAT_0015    | hypothetical protein                                                   | * | * | * |

|      |      |                                                                   |          |           |          |           |                                                                   |   |   |   |
|------|------|-------------------------------------------------------------------|----------|-----------|----------|-----------|-------------------------------------------------------------------|---|---|---|
| 1029 | 1424 | DNA gyrase subunit B                                              | TAO_0003 | NHAL_0004 | NOC_0019 | NWAT_0014 | DNA gyrase subunit B                                              | * | * | * |
| 1030 | 2025 | -                                                                 | -        | NHAL_0003 | NOC_0018 | NWAT_0013 | <b>DNA replication and repair protein RecF</b>                    | * |   |   |
| 1031 | 970  | DNA polymerase III subunit beta                                   | TAO_0002 | NHAL_0002 | NOC_0002 | NWAT_0002 | DNA polymerase III subunit beta                                   | * | * | * |
| 1032 | 1225 | chromosomal replication initiator protein, DnaA                   | TAO_0001 | NHAL_0001 | NOC_0001 | NWAT_0001 | chromosomal replication initiator protein DnaA                    | * | * | * |
| 1033 | 2390 | -                                                                 | -        | NHAL_3961 | NOC_3089 |           | <b>50S ribosomal protein L34</b>                                  | * |   |   |
| 1034 | 240  | ribonuclease P protein component                                  | TAO_1839 | NHAL_3960 | NOC_3088 | NWAT_3143 | ribonuclease P protein component                                  | * | * | * |
| 1035 | 1274 | membrane protein insertase                                        | TAO_1838 | NHAL_3959 | NOC_3087 | NWAT_3142 | membrane protein insertase                                        | * | * | * |
| 1036 | 1135 | tRNA modification GTPase TrmE                                     | TAO_1837 | NHAL_3958 | NOC_3086 | NWAT_3141 | tRNA modification GTPase TrmE                                     | * | * | * |
| 1037 | 1373 | tRNA uridine 5-carboxymethylaminomethyl modification protein GidA | TAO_1836 | NHAL_3957 | NOC_3085 | NWAT_3140 | tRNA uridine 5-carboxymethylaminomethyl modification protein GidA | * | * | * |
| 1038 | 492  | rRNA small subunit methyltransferase GidB                         | TAO_1835 | NHAL_3956 | NOC_3084 | NWAT_3139 | RRNA small subunit methyltransferase GidB                         | * | * | * |
| 1039 | 775  | chromosome partitioning protein ParA                              | TAO_1834 | NHAL_3955 | NOC_3083 | NWAT_3138 | cobyrinic acid a,c-diamide synthase                               | * | * | * |
| 1040 | 780  | chromosome partitioning protein ParB                              | TAO_1833 | NHAL_3954 | NOC_3082 | NWAT_3137 | ParB-like partition protein                                       | * | * | * |
| 1041 | 229  | ATP synthase I chain                                              | TAO_1832 | NHAL_3953 | NOC_3081 | NWAT_3136 | ATP synthase I chain                                              | * | * | * |
| 1042 | 903  | F0F1 ATP synthase subunit A                                       | TAO_1831 | NHAL_3952 | NOC_3080 | NWAT_3135 | F0F1 ATP synthase subunit A                                       | * | * | * |
| 1043 | 292  | F0F1 ATP synthase subunit C                                       | TAO_1830 | NHAL_3951 | NOC_3079 | NWAT_3134 | ATP synthase F0 subunit C                                         | * | * | * |
| 1044 | 419  | F0F1 ATP synthase subunit B                                       | TAO_1829 | NHAL_3950 | NOC_3078 | NWAT_3133 | F0F1 ATP synthase subunit B                                       | * | * | * |
| 1045 | 427  | F0F1 ATP synthase subunit delta                                   | TAO_1828 | NHAL_3949 | NOC_3077 | NWAT_3132 | F0F1 ATP synthase subunit delta                                   | * | * | * |
| 1046 | 1329 | F0F1 ATP synthase subunit alpha                                   | TAO_1827 | NHAL_3948 | NOC_3076 | NWAT_3131 | ATP synthase F0F1 subunit alpha                                   | * | * | * |
| 1047 | 912  | F0F1 ATP synthase subunit gamma                                   | TAO_1826 | NHAL_3947 | NOC_3075 | NWAT_3130 | ATP synthase F1 subunit gamma                                     | * | * | * |
| 1048 | 1304 | F0F1 ATP synthase subunit beta                                    | TAO_1825 | NHAL_3946 | NOC_3074 | NWAT_3129 | F0F1 ATP synthase subunit beta                                    | * | * | * |
| 1049 | 391  | F0F1 ATP synthase subunit epsilon                                 | TAO_1824 | NHAL_3945 | NOC_3073 | NWAT_3128 | ATP synthase F1 subunit epsilon                                   | * | * | * |
| 1050 | 1183 | UDP-N-acetylglucosamine pyrophosphorylase                         | TAO_1823 | NHAL_3944 | NOC_3072 | NWAT_3127 | UDP-N-acetylglucosamine pyrophosphorylase                         | * | * | * |
| 1051 | 1038 | glycine cleavage system aminomethyltransferase T                  | TAO_1819 | NHAL_3938 | NOC_0500 | NWAT_2590 | glycine cleavage system T protein                                 | * | * | * |
| 1052 | 1257 | argininosuccinate lyase                                           | TAO_1818 | NHAL_3937 | NOC_0501 | NWAT_2589 | argininosuccinate lyase                                           | * | * | * |
| 1053 | 934  | porphobilinogen deaminase                                         | TAO_1817 | NHAL_3936 | NOC_0502 | NWAT_2588 | porphobilinogen deaminase                                         | * | * | * |
| 1054 | 687  | uroporphyrinogen III synthase HEM4                                | TAO_1816 | NHAL_3935 | NOC_0503 | NWAT_2587 | uroporphyrinogen III synthase HEM4                                | * | * | * |
| 1055 | 728  | hypothetical conserved protein                                    | TAO_1815 | NHAL_3934 | NOC_0504 | NWAT_2586 | hypothetical protein                                              | * | * | * |
| 1056 | 1117 | HemY domain-containing protein                                    | TAO_1814 | NHAL_3933 | NOC_0505 | NWAT_2585 | hemY domain-containing protein                                    | * | * | * |
| 1057 | 231  | cell division topological specificity factor MinE                 | TAO_1813 | NHAL_3931 | NOC_0506 | NWAT_2584 | cell division topological specificity factor MinE                 | * | * | * |
| 1058 | 834  | septum site-determining protein MinD                              | TAO_1812 | NHAL_3930 | NOC_0507 | NWAT_2583 | septum site-determining protein MinD                              | * | * | * |
| 1059 | 591  | septum site-determining protein MinC                              | TAO_1811 | NHAL_3929 | NOC_0508 | NWAT_2582 | septum site-determining protein MinC                              | * | * | * |
| 1060 | 1090 | peptide chain release factor 1                                    | TAO_1810 | NHAL_3928 | NOC_0509 | NWAT_2581 | peptide chain release factor 1                                    | * | * | * |
| 1061 | 1202 | glutamyl-tRNA reductase                                           | TAO_1809 | NHAL_3927 | NOC_0510 | NWAT_2580 | glutamyl-tRNA reductase                                           | * | * | * |
| 1062 | 1279 | hypothetical conserved protein                                    | TAO_1808 | NHAL_3926 | NOC_0511 | NWAT_2579 | TPR repeat-containing protein                                     | * | * | * |
| 1063 | 526  | outer membrane lipoprotein LolB                                   | TAO_1807 | NHAL_3925 | NOC_0512 | NWAT_2578 | outer membrane lipoprotein LolB                                   | * | * | * |
| 1064 | 832  | 4-diphosphocytidyl-2C-methyl-D-erythritol kinase                  | TAO_1806 | NHAL_3924 | NOC_0513 | NWAT_2577 | 4-diphosphocytidyl-2-C-methyl-D-erythritol kinase                 | * | * | * |
| 1065 | 988  | ribose-phosphate pyrophosphokinase                                | TAO_1805 | NHAL_3923 | NOC_0514 | NWAT_2576 | ribose-phosphate pyrophosphokinase                                | * | * | * |
| 1066 | 599  | 50S ribosomal protein L25                                         | TAO_1804 | NHAL_3922 | NOC_0515 | NWAT_2575 | ribosomal 5S rRNA E-loop binding protein Ctc/L25/TL5              | * | * | * |
| 1067 | 568  | peptidyl-tRNA hydrolase                                           | TAO_1803 | NHAL_3921 | NOC_0516 | NWAT_2574 | peptidyl-tRNA hydrolase                                           | * | * | * |
| 1068 | 1106 | GTP-binding protein YchF                                          | TAO_1802 | NHAL_3920 | NOC_0517 | NWAT_2573 | GTP-binding protein YchF                                          | * | * | * |
| 1069 | 2222 | -                                                                 | -        | NHAL_3486 | NOC_0521 | NWAT_2569 | <b>sodium/hydrogen exchanger</b>                                  | * |   |   |
| 1070 | 1686 | -                                                                 | -        | NHAL_3483 | NOC_0522 | NWAT_2568 | <b>hypothetical protein</b>                                       | * |   |   |
| 1071 | 2661 | -                                                                 | -        |           | NOC_0531 | NWAT_2555 | <b>NnrU-like protein</b>                                          | * |   |   |
| 1072 | 468  | metal-binding protein                                             | TAO_0777 | NHAL_2564 | NOC_0535 | NWAT_2552 | metal-binding protein                                             | * | * | * |
| 1073 | 2094 | -                                                                 | -        | NHAL_2565 | NOC_0536 | NWAT_2551 | <b>TraB family protein</b>                                        | * |   |   |
| 1074 | 967  | sigma-54 specific transcriptional regulator, Fis-type             | TAO_0778 | NHAL_2566 | NOC_0537 | NWAT_2550 | Fis family-54 specific transcriptional regulator                  | * | * | * |
| 1075 | 718  | hypothetical conserved protein                                    | TAO_0779 | NHAL_2567 | NOC_0538 | NWAT_2549 | hypothetical protein                                              | * | * | * |
| 1076 | 1418 | hypothetical conserved protein                                    | TAO_0790 | NHAL_2578 | NOC_0427 | NWAT_2674 | hypothetical protein                                              | * | * | * |
| 1077 | 624  | ABC transporter ATP-binding protein                               | TAO_0791 | NHAL_2579 | NOC_0428 | NWAT_2673 | ABC transporter protein                                           | * | * | * |

|      |      |                                                                  |                      |           |          |           |                                                                  |   |   |   |
|------|------|------------------------------------------------------------------|----------------------|-----------|----------|-----------|------------------------------------------------------------------|---|---|---|
| 1078 | 494  | arylesterase                                                     | TAO_0792             | NHAL_2580 | NOC_0429 | NWAT_2672 | arylesterase                                                     | * | * | * |
| 1079 | 89   | hypothetical conserved protein                                   | TAO_0796<br>TAO_0797 | NHAL_2586 | NOC_1220 | NWAT_1107 | hypothetical conserved protein                                   | * | * | * |
| 1080 | 410  | hypothetical conserved protein                                   | TAO_0798             | NHAL_2587 | NOC_1221 | NWAT_1108 | hypothetical protein                                             | * | * | * |
| 1081 | 76   | hypothetical conserved protein                                   | TAO_0799<br>TAO_0800 | NHAL_2588 | NOC_1222 | NWAT_1109 | hypothetical conserved protein                                   | * | * | * |
| 1082 | 380  | redoxin domain-containing protein                                | TAO_0801             | NHAL_2589 | NOC_1223 | NWAT_1110 | redoxin domain-containing protein                                | * | * | * |
| 1083 | 1514 | arginine decarboxylase                                           | TAO_0802             | NHAL_2590 |          | NWAT_1111 | arginine decarboxylase                                           | * |   |   |
| 1084 | 1375 | hypothetical conserved protein                                   | TAO_0803             | NHAL_2591 | NOC_1224 | NWAT_1112 | hypothetical protein                                             | * | * | * |
| 1085 | 913  | ApbE family lipoprotein                                          | TAO_0804             | NHAL_2592 | NOC_1225 | NWAT_1113 | ApbE family lipoprotein                                          | * | * | * |
| 1086 | 2129 | SAM-dependent methyltransferase                                  | TAO_0805             |           | NOC_1226 | NWAT_1114 | SAM-dependent methyltransferase                                  | * |   |   |
| 1087 | 862  | ABC-type polysaccharide/polyol phosphate export systems permease | TAO_0806             | NHAL_2593 | NOC_1227 | NWAT_1115 | ABC-type polysaccharide/polyol phosphate export systems permease | * | * | * |
| 1088 | 1129 | ABC transporter ATP-binding protein                              | TAO_0807             | NHAL_2594 | NOC_1228 | NWAT_1116 | ABC transporter protein                                          | * | * | * |
| 1089 | 649  | hypothetical conserved protein                                   | TAO_0808             | NHAL_2595 | NOC_1229 | NWAT_1117 | hypothetical protein                                             | * | * | * |
| 1090 | 534  | hypothetical conserved protein                                   | TAO_0809             | NHAL_2596 | NOC_1230 | NWAT_1118 | hypothetical protein                                             | * | * | * |
| 1091 | 689  | hypothetical conserved protein                                   | TAO_0810             | NHAL_2597 | NOC_1231 | NWAT_1119 | hypothetical protein                                             | * | * | * |
| 1092 | 1444 | family 2 glycosyl transferase                                    | TAO_0811             | NHAL_2598 | NOC_1232 | NWAT_1120 | family 2 glycosyl transferase                                    | * | * | * |
| 1093 | 859  | glycosyltransferase involved in cell wall bioproteinsis          | TAO_0812             | NHAL_2599 | NOC_1233 | NWAT_1121 | family 2 glycosyl transferase                                    | * | * | * |
| 1094 | 727  | NAD-dependent epimerase/dehydratase                              | TAO_0813             | NHAL_1333 | NOC_1234 | NWAT_1122 | NAD-dependent epimerase/dehydratase                              | * | * | * |
| 1095 | 817  | family 2 glycosyl transferase                                    | TAO_0814             | NHAL_2600 | NOC_1235 | NWAT_1123 | family 2 glycosyl transferase                                    | * | * | * |
| 1096 | 1091 | group 1 glycosyl transferase                                     | TAO_0815             | NHAL_2601 | NOC_1236 | NWAT_1124 | group 1 glycosyl transferase                                     | * | * | * |
| 1097 | 1887 | -                                                                | -                    | NHAL_2602 | NOC_1237 | NWAT_1125 | chaperone protein HtpG                                           | * |   |   |
| 1098 | 2282 | -                                                                | -                    | NHAL_2603 | NOC_1238 | NWAT_1126 | molybdopterin oxidoreductase, iron-sulfur binding subunit        | * |   |   |
| 1099 | 2145 | -                                                                | -                    | NHAL_2604 | NOC_1239 | NWAT_1127 | polysulfide reductase NrfD                                       | * |   |   |
| 1100 | 1753 | -                                                                | -                    | NHAL_2605 | NOC_1240 | NWAT_1128 | transmembrane prediction                                         | * |   |   |
| 1101 | 1748 | -                                                                | -                    | NHAL_2606 | NOC_1241 | NWAT_1129 | hypothetical protein                                             | * |   |   |
| 1102 | 2004 | -                                                                | -                    | NHAL_2607 | NOC_1242 | NWAT_1130 | hypothetical protein                                             | * |   |   |
| 1103 | 1561 | -                                                                | -                    | NHAL_2608 | NOC_1243 | NWAT_1131 | hypothetical protein                                             | * |   |   |
| 1104 | 1835 | -                                                                | -                    | NHAL_2609 | NOC_1244 | NWAT_1132 | cytochrome C oxidase subunit II                                  | * |   |   |
| 1105 | 2213 | -                                                                | -                    | NHAL_2610 | NOC_1245 | NWAT_1133 | cytochrome c oxidase subunit I                                   | * |   |   |
| 1106 | 1831 | -                                                                | -                    | NHAL_2611 | NOC_1246 | NWAT_1134 | cytochrome C oxidase subunit III                                 | * |   |   |
| 1107 | 1607 | -                                                                | -                    | NHAL_2612 | NOC_1247 | NWAT_1135 | Caa(3)-type oxidase subunit IV                                   | * |   |   |
| 1108 | 2181 | -                                                                | -                    | NHAL_2893 | NOC_1248 | NWAT_1136 | proton-translocating NADH-quinone oxidoreductase subunit M       | * |   |   |
| 1109 | 2177 | -                                                                | -                    | NHAL_2894 | NOC_1249 | NWAT_1137 | proton-translocating NADH-quinone oxidoreductase subunit M       | * |   |   |
| 1110 | 2165 | -                                                                | -                    | NHAL_2895 | NOC_1250 | NWAT_1138 | NADH/ubiquinone/plastoquinone (complex I)                        | * |   |   |
| 1111 | 2274 | -                                                                | -                    | NHAL_2896 | NOC_1251 | NWAT_1139 | hypothetical protein                                             | * |   |   |
| 1112 | 2156 | -                                                                | -                    | NHAL_2897 | NOC_1252 | NWAT_1140 | proton-translocating NADH-quinone oxidoreductase subunit M       | * |   |   |
| 1113 | 498  | methylase                                                        | TAO_0857             | NHAL_2898 | NOC_1253 | NWAT_1141 | methylase                                                        | * | * | * |
| 1114 | 2281 | -                                                                | -                    | NHAL_2900 | NOC_1254 | NWAT_1142 | 2-oxo-acid dehydrogenase E1 subunit, homodimeric type            | * |   |   |
| 1115 | 2071 | -                                                                | -                    | NHAL_2901 | NOC_1255 | NWAT_1143 | branched-chain $\alpha$ -keto acid dehydrogenase subunit E2      | * |   |   |
| 1116 | 1265 | dihydroliipoamide dehydrogenase                                  | TAO_1319             | NHAL_2902 | NOC_1256 | NWAT_1144 | dihydroliipoamide dehydrogenase                                  | * | * | * |
| 1117 | 1852 | -                                                                | -                    | NHAL_2903 | NOC_1257 | NWAT_1146 | HNH endonuclease                                                 | * |   |   |
| 1118 | 2000 | -                                                                | -                    | NHAL_2904 | NOC_1258 | NWAT_1147 | UspA domain-containing protein                                   | * |   |   |
| 1119 | 2261 | -                                                                | -                    | NHAL_2907 | NOC_1259 | NWAT_1148 | hypothetical protein                                             | * |   |   |
| 1120 | 1954 | -                                                                | -                    | NHAL_2909 | NOC_1260 | NWAT_1149 | metallophosphoesterase                                           | * |   |   |
| 1121 | 1878 | methyltransferase domin containing protein                       | TAO_1464             |           | NOC_1261 | NWAT_1150 | methyltransferase domin containing protein                       | * |   |   |
| 1122 | 1337 | ABC transporter ATP-binding protein                              | TAO_1463             | NHAL_0813 | NOC_1262 | NWAT_1151 | ABC transporter protein                                          | * | * | * |
| 1123 | 1020 | cytochrome-c peroxidase                                          | TAO_1462             | NHAL_0820 | NOC_1263 | NWAT_1152 | cytochrome-c peroxidase                                          | * | * | * |
| 1124 | 696  | O-methyltransferase                                              | TAO_0937             | NHAL_1398 | NOC_1264 | NWAT_1153 | O-methyltransferase family                                       | * | * | * |
| 1125 | 682  | phosphomethylpyrimidine kinase                                   | TAO_0938             | NHAL_1399 | NOC_1265 | NWAT_1154 | phosphomethylpyrimidine kinase                                   | * | * | * |

|      |      |                                                      |                      |           |          |              |                                                              |   |   |   |
|------|------|------------------------------------------------------|----------------------|-----------|----------|--------------|--------------------------------------------------------------|---|---|---|
| 1126 | 1316 | acetolactate synthase                                | TAO_0939             | NHAL_1401 | NOC_1266 | NWAT_1155    | thiamine pyrophosphate TPP binding domain-containing protein | * | * | * |
| 1127 | 826  | citrate synthase                                     | TAO_0940             | NHAL_1402 | NOC_1267 | NWAT_1156    | citrate synthase                                             | * | * | * |
| 1128 | 761  | hypothetical conserved protein                       | TAO_0941             | NHAL_1403 | NOC_1268 | NWAT_1157    | hypothetical protein                                         | * | * | * |
| 1129 | 1336 | TonB-dependent receptor plug                         | TAO_0942             | NHAL_1404 | NOC_1269 | NWAT_1158    | TonB-dependent receptor plug                                 | * | * | * |
| 1130 | 666  | hypothetical conserved protein                       | TAO_0943             | NHAL_1406 | NOC_1270 | NWAT_1159    | hypothetical protein                                         | * | * | * |
| 1131 | 1461 | diguanylate phosphodiesterase                        | TAO_0944             | NHAL_1407 | NOC_1271 | NWAT_1160    | diguanylate cyclase/phosphodiesterase                        | * | * | * |
| 1132 | 1415 | ABC transporter permease                             | TAO_0945             | NHAL_1408 | NOC_1272 | NWAT_1161    | ABC transporter permease                                     | * | * | * |
| 1133 | 627  | ABC transporter ATP-binding protein                  | TAO_0946             | NHAL_1409 | NOC_1273 | NWAT_1162    | ABC transporter protein                                      | * | * | * |
| 1134 | 75   | efflux system outer membrane lipoprotein             | TAO_0449<br>TAO_0450 | NHAL_0837 | NOC_1275 | NWAT_1164    | NodT family RND efflux system outer membrane lipoprotein     | * | * |   |
| 1135 | 2861 | -                                                    | -                    | -         | NOC_1276 | NWAT_1165    | RND family efflux transporter MFP subunit                    | * |   |   |
| 1136 | 2901 | -                                                    | -                    | -         | NOC_1277 | NWAT_1166    | Acriflavin resistance protein                                | * |   |   |
| 1137 | 2649 | -                                                    | -                    | -         | NOC_1278 | NWAT_1167    | hypothetical protein                                         | * |   |   |
| 1138 | 2195 | -                                                    | -                    | NHAL_1813 | NOC_1279 | NWAT_1168    | NADH/ubiquinone/plastoquinone (complex I)                    | * |   |   |
| 1139 | 2190 | -                                                    | -                    | NHAL_1814 | NOC_1280 | NWAT_1169    | NADH/ubiquinone/plastoquinone (complex I)                    | * |   |   |
| 1140 | 2157 | -                                                    | -                    | NHAL_1815 | NOC_1281 | NWAT_1170    | NADH/ubiquinone/plastoquinone complex I                      | * |   |   |
| 1141 | 1625 | -                                                    | -                    | NHAL_1816 | NOC_1282 | NWAT_1171    | NADH-ubiquinone oxidoreductase, chain 4L                     | * |   |   |
| 1142 | 1838 | -                                                    | -                    | NHAL_1817 | NOC_1283 | NWAT_1172    | hypothetical protein                                         | * |   |   |
| 1143 | 1595 | -                                                    | -                    | NHAL_1818 | NOC_1284 | NWAT_1173    | hypothetical protein                                         | * |   |   |
| 1144 | 1621 | -                                                    | -                    | NHAL_1819 | NOC_1285 | NWAT_1174    | Monovalent cation/proton antiporter subunit MnhG/phaG        | * |   |   |
| 1145 | 1563 | -                                                    | -                    | NHAL_1820 | NOC_1286 | NWAT_1175    | multiple resistance and pH regulation protein F              | * |   |   |
| 1146 | 1727 | -                                                    | -                    | NHAL_1821 | NOC_1287 | NWAT_1177    | cation antiporter                                            | * |   |   |
| 1147 | 1987 | -                                                    | -                    | NHAL_1823 | NOC_1288 | NWAT_1178    | UspA domain-containing protein                               | * |   |   |
| 1148 | 2816 | -                                                    | -                    | -         | NOC_1296 | NWAT_1180    | hypothetical protein                                         | * |   |   |
| 1149 | 2837 | -                                                    | -                    | -         | NOC_1297 | NWAT_1181    | hypothetical protein                                         | * |   |   |
| 1150 | 318  | HNH endonuclease                                     | TAO_1317             | NHAL_2512 | NOC_1298 | NWAT_1182    | HNH endonuclease                                             | * | * | * |
| 1151 | 381  | zinc chelation protein SecC                          | TAO_1315             | NHAL_2513 | NOC_1299 | NWAT_1183    | SEC-C motif domain-containing protein                        | * | * | * |
| 1152 | 1335 | (p)ppGpp synthetase, RelA/spoT family                | TAO_1314             | NHAL_1289 | NOC_1300 | NWAT_1184    | (p)ppGpp synthetase, RelA/spoT family                        | * | * | * |
| 1153 | 1463 | ATP-dependent helicase HrpA                          | TAO_1313             | NHAL_1290 | NOC_1301 | NWAT_1185    | ATP-dependent helicase HrpA                                  | * | * | * |
| 1154 | 139  | hypothetical conserved protein                       | TAO_1312             | NHAL_1292 | NOC_1302 | NWAT_1186    | hypothetical protein                                         | * | * | * |
| 1155 | 2250 | -                                                    | -                    | NHAL_1294 | NOC_1303 | NWAT_1187    | RNA binding S1 domain-containing protein                     | * |   |   |
| 1156 | 263  | hypothetical conserved protein                       | TAO_1309             | NHAL_1295 | NOC_1304 | NWAT_1188    | hypothetical protein                                         | * | * | * |
| 1157 | 1358 | sulfite reductase (NADPH) flavoprotein subunit alpha | TAO_1308             | NHAL_1296 | NOC_1305 | NWAT_1189    | sulfite reductase flavoprotein subunit alpha                 | * | * | * |
| 1158 | 1367 | sulfite reductase (NADPH) hemoprotein subunit beta   | TAO_1307             | NHAL_1297 | NOC_1306 | NWAT_1190    | sulfite reductase hemoprotein subunit beta                   | * | * | * |
| 1159 | 177  | hypothetical protein                                 | TAO_1305             | NHAL_1298 | NOC_1307 | NWAT_1191    | peroxidase                                                   | * | * | * |
| 1160 | 660  | peptidase M48 Ste24p                                 | TAO_1304             | NHAL_1301 | NOC_1308 | NWAT_1192    | peptidase M48, Ste24p                                        | * | * | * |
| 1161 | 2548 | -                                                    | -                    | -         | NOC_1311 | NWAT_1194    | hypothetical protein                                         | * |   |   |
| 1162 | 2833 | -                                                    | -                    | -         | NOC_1312 | NWAT_1195(1) | nucleic acid-binding OB-fold tRNA/helicase-type              | * |   |   |
| 1163 | 2447 | -                                                    | -                    | -         | NOC_1313 | NWAT_1195(2) | nucleic acid-binding OB-fold tRNA/helicase-type              | * |   |   |
| 1164 | 1435 | aminopeptidase N                                     | TAO_1303             | NHAL_1302 | NOC_1314 | NWAT_1196    | aminopeptidase N                                             | * | * | * |
| 1165 | 2024 | -                                                    | -                    | NHAL_1304 | NOC_1315 | NWAT_1197    | 2-aminoethylphosphonate aminotransferase                     | * |   |   |
| 1166 | 1024 | phosphonopyruvate decarboxylase                      | TAO_1302             | NHAL_1305 | NOC_1316 | NWAT_1198    | phosphonopyruvate decarboxylase                              | * | * | * |
| 1167 | 2206 | -                                                    | -                    | NHAL_1306 | NOC_1317 | NWAT_1199    | phosphoenolpyruvate phosphomutase                            | * |   |   |
| 1168 | 1928 | -                                                    | -                    | NHAL_1307 | NOC_1318 | NWAT_1200    | hypothetical protein                                         | * |   |   |
| 1169 | 527  | hopanoid-associated phosphorylase                    | TAO_1299             | NHAL_1308 | NOC_1319 | NWAT_1201    | hopanoid-associated phosphorylase                            | * | * | * |
| 1170 | 1406 | squalene-hopene cyclase                              | TAO_1298             | NHAL_1309 | NOC_1320 | NWAT_1202    | squalene-hopene cyclase                                      | * | * | * |
| 1171 | 1066 | squalene/phytoene synthase                           | TAO_1297             | NHAL_1310 | NOC_1321 | NWAT_1203    | squalene/phytoene synthase                                   | * | * | * |
| 1172 | 2406 | -                                                    | -                    | -         | NOC_1322 | NWAT_1204    | hypothetical protein                                         | * |   |   |
| 1173 | 707  | hypothetical conserved protein                       | TAO_0998             | NHAL_1311 | NOC_1323 | NWAT_1205    | hypothetical protein                                         | * | * | * |
| 1174 | 2672 | -                                                    | -                    | -         | NOC_1324 | NWAT_1206    | alkyl hydroperoxide reductase                                | * |   |   |
| 1175 | 1618 | -                                                    | -                    | NHAL_0195 | NOC_1325 | NWAT_1207    | Slp family outer membrane lipoprotein                        | * |   |   |



|      |      |                                                                                |                 |              |             |              |                                                                        |   |   |   |
|------|------|--------------------------------------------------------------------------------|-----------------|--------------|-------------|--------------|------------------------------------------------------------------------|---|---|---|
| 1176 | 1986 | -                                                                              | -               | NHAL_1671    | NOC_1326    | NWAT_1208    | <b>fatty acid hydroxylase</b>                                          | * |   |   |
| 1177 | 1696 | -                                                                              | -               | NHAL_1682    | NOC_1338    | NWAT_1211    | <b>hypothetical protein</b>                                            | * |   |   |
| 1178 | 868  | <b>RND family efflux transporter MFP subunit</b>                               | <b>TAO_1254</b> | NHAL_1683    | NOC_1339    | NWAT_1212    | RND family efflux transporter MFP subunit                              | * | * | * |
| 1179 | 1447 | <b>CzcA family heavy metal efflux pump</b>                                     | <b>TAO_1255</b> | NHAL_1684    | NOC_1340    | NWAT_1213    | CzcA family heavy metal efflux pump                                    | * | * | * |
| 1180 | 595  | <b>carbonic anhydrase</b>                                                      | <b>TAO_1070</b> | NHAL_3058    | NOC_1341    | NWAT_1214    | carbonic anhydrase                                                     | * | * | * |
| 1181 | 30   | -                                                                              | -               | NHAL_0428    | NOC_1342(1) | NWAT_1215(1) | <b>peptidoglycan-binding lysin domain-containing protein</b>           | * |   |   |
| 1182 | 1546 | -                                                                              | -               | NHAL_1696(2) | NOC_1342(2) | NWAT_1215(2) | <b>peptidoglycan-binding lysin domain-containing protein</b>           | * |   |   |
| 1183 | 1489 | <b>hypothetical conserved protein</b>                                          | <b>TAO_0085</b> | -            | NOC_1343    | NWAT_1216    | hypothetical conserved protein                                         | * |   |   |
| 1184 | 2167 | -                                                                              | -               | NHAL_3055    | NOC_1344    | NWAT_1217    | <b>family 5 extracellular solute-binding protein</b>                   | * |   |   |
| 1185 | 877  | <b>bis(5'-nucleosyl)-tetrphosphatase (symmetrical)</b>                         | <b>TAO_1071</b> | NHAL_3054    | NOC_1345    | NWAT_1218    | bis(5'-nucleosyl)-tetrphosphatase (symmetrical)                        | * | * | * |
| 1186 | 367  | <b>magnesium transporter ApaG</b>                                              | <b>TAO_1072</b> | NHAL_3053    | NOC_1346    | NWAT_1219    | ApaG domain-containing protein                                         | * | * | * |
| 1187 | 839  | <b>glucokinase</b>                                                             | <b>TAO_1073</b> | NHAL_3052    | NOC_1347    | NWAT_1220    | glucokinase                                                            | * | * | * |
| 1188 | 697  | <b>6-phosphogluconolactonase</b>                                               | <b>TAO_1074</b> | NHAL_3051    | NOC_1348    | NWAT_1221    | 6-phosphogluconolactonase                                              | * | * | * |
| 1189 | 179  | <b>hypothetical conserved protein</b>                                          | <b>TAO_1075</b> | NHAL_3050    | NOC_1349    | NWAT_1222    | hypothetical protein                                                   | * | * | * |
| 1190 | 1769 | <b>hypothetical conserved protein</b>                                          | <b>TAO_0282</b> | -            | NOC_1350    | NWAT_1223    | hypothetical conserved protein                                         | * |   |   |
| 1191 | 68   | <b>peptidase</b>                                                               | <b>TAO_0280</b> | NHAL_3049    | NOC_1351    | NWAT_1224    | propeptide PepSY amd peptidase M4                                      | * | * |   |
| 1192 | 153  | <b>peptidase</b>                                                               | <b>TAO_0279</b> | NHAL_3048    | NOC_1353    | NWAT_1226    | propeptide PepSY amd peptidase M4                                      | * | * | * |
| 1193 | 725  | <b>response regulator receiver</b>                                             | <b>TAO_0278</b> | NHAL_3047    | NOC_1354    | NWAT_1227    | response regulator receiver                                            | * | * | * |
| 1194 | 1148 | <b>ATP-binding region ATPase domain-containing protein</b>                     | <b>TAO_0277</b> | NHAL_3046    | NOC_1355    | NWAT_1228    | ATP-binding region ATPase domain-containing protein                    | * | * | * |
| 1195 | 2135 | -                                                                              | -               | NHAL_2006    | NOC_1356    | NWAT_1229    | <b>phoPQ-activated pathogenicity-like protein PqaA type</b>            | * |   |   |
| 1196 | 1006 | <b>hypothetical conserved protein</b>                                          | <b>TAO_1131</b> | NHAL_2007    | NOC_1357    | NWAT_1230    | hypothetical protein                                                   | * | * | * |
| 1197 | 476  | <b>hypothetical conserved protein</b>                                          | <b>TAO_1129</b> | NHAL_2011    | NOC_1358    | NWAT_1231    | hypothetical protein                                                   | * | * | * |
| 1198 | 208  | <b>hypothetical conserved protein</b>                                          | <b>TAO_1128</b> | NHAL_2014    | NOC_1360    | NWAT_1232    | hypothetical protein                                                   | * | * | * |
| 1199 | 1039 | <b>twitching motility protein pilT</b>                                         | <b>TAO_1126</b> | NHAL_2016    | NOC_1361    | NWAT_1233    | twitching motility protein pilT                                        | * | * | * |
| 1200 | 1956 | -                                                                              | -               | NHAL_2017    | NOC_1362    | NWAT_1234    | <b>auxin efflux carrier</b>                                            | * |   |   |
| 1201 | 747  | <b>molybdopterin-binding domain-containing protein</b>                         | <b>TAO_1125</b> | NHAL_2018    | NOC_1363    | NWAT_1235    | molybdopterin binding domain-containing protein                        | * | * | * |
| 1202 | 1357 | <b>helicase c2</b>                                                             | <b>TAO_0963</b> | NHAL_2019    | NOC_1364    | NWAT_1236    | helicase c2                                                            | * | * | * |
| 1203 | 2026 | -                                                                              | -               | NHAL_2020    | NOC_1365    | NWAT_1237    | <b>bile acid:sodium symporter</b>                                      | * |   |   |
| 1204 | 532  | <b>LmbE family protein</b>                                                     | <b>TAO_1016</b> | NHAL_2025    | NOC_1370    | NWAT_1239    | LmbE family protein                                                    | * | * | * |
| 1205 | 409  | <b>hypothetical conserved protein</b>                                          | <b>TAO_1015</b> | NHAL_2026    | NOC_1371    | NWAT_1240    | hypothetical protein                                                   | * | * | * |
| 1206 | 538  | <b>hypothetical conserved protein</b>                                          | <b>TAO_1014</b> | NHAL_2028    | NOC_1372    | NWAT_1241    | hypothetical protein                                                   | * | * | * |
| 1207 | 2316 | -                                                                              | -               | NHAL_2029    | -           | NWAT_1242    | <b>hypothetical protein</b>                                            | * |   |   |
| 1208 | 2013 | -                                                                              | -               | NHAL_2030    | NOC_1373    | NWAT_1243    | <b>SCP-like extracellular protein</b>                                  | * |   |   |
| 1209 | 2164 | -                                                                              | -               | NHAL_2032    | NOC_1374    | NWAT_1244    | <b>ATPase AAA</b>                                                      | * |   |   |
| 1210 | 1985 | -                                                                              | -               | NHAL_2033    | NOC_1375    | NWAT_1245    | <b>alpha/beta hydrolase fold protein</b>                               | * |   |   |
| 1211 | 524  | <b>alkyl hydroperoxide reductase/ thiol specific antioxidant/ mal allergen</b> | <b>TAO_1024</b> | NHAL_2034    | NOC_1376    | NWAT_1246    | alkyl hydroperoxide reductase/thiol specific antioxidant/ mal allergen | * | * | * |
| 1212 | 1197 | <b>isocitrate dehydrogenase, NADP-dependent</b>                                | <b>TAO_0765</b> | NHAL_2539    | NOC_1378    | NWAT_1248    | isocitrate dehydrogenase NADP-dependent                                | * | * | * |
| 1213 | 2068 | -                                                                              | -               | NHAL_2540    | NOC_1379    | NWAT_1249    | <b>type 12 methyltransferase</b>                                       | * |   |   |
| 1214 | 2797 | -                                                                              | -               | -            | NOC_1380    | NWAT_1250    | <b>endonuclease/exonuclease/phosphatase</b>                            | * |   |   |
| 1215 | 2800 | -                                                                              | -               | -            | NOC_1381    | NWAT_1251    | <b>hypothetical protein</b>                                            | * |   |   |
| 1216 | 1906 | -                                                                              | -               | NHAL_3149    | NOC_1382    | NWAT_1252    | <b>chaperone DnaJ domain-containing protein</b>                        | * |   |   |
| 1217 | 1548 | -                                                                              | -               | NHAL_3148    | NOC_1383    | NWAT_1253    | <b>MerR family transcriptional regulator</b>                           | * |   |   |
| 1218 | 2047 | -                                                                              | -               | NHAL_3097    | NOC_1651    | NWAT_1477    | <b>hypothetical protein</b>                                            | * |   |   |
| 1219 | 293  | <b>iron-sulfur cluster assembly accessory protein</b>                          | <b>TAO_1006</b> | NHAL_1931    | NOC_1650    | NWAT_1478    | iron-sulfur cluster assembly accessory protein                         | * | * | * |
| 1220 | 1011 | <b>cysteine desulfurase</b>                                                    | <b>TAO_1005</b> | NHAL_1930    | NOC_1649    | NWAT_1479    | cysteine desulfurase                                                   | * | * | * |
| 1221 | 1751 | -                                                                              | -               | NHAL_1929    | NOC_1648    | NWAT_1480    | <b>iron-sulfur cluster assembly transcription factor iscR</b>          | * |   |   |
| 1222 | 659  | <b>serine O-acetyltransferase</b>                                              | <b>TAO_1004</b> | NHAL_1928    | NOC_1647    | NWAT_1481    | serine O-acetyltransferase                                             | * | * | * |
| 1223 | 550  | <b>RNA methyl transferase TrmH</b>                                             | <b>TAO_1003</b> | NHAL_1927    | NOC_1646    | NWAT_1482    | RNA methyl transferase TrmH                                            | * | * | * |
| 1224 | 969  | <b>S-adenosylmethionine/tRNA-ribosyltransferase-isomerase</b>                  | <b>TAO_1002</b> | NHAL_1926    | NOC_1645    | NWAT_1483    | S-adenosylmethionine/tRNA-ribosyltransferase- isomerase                | * | * | * |

|      |      |                                                      |          |           |             |              |                                                           |   |   |   |
|------|------|------------------------------------------------------|----------|-----------|-------------|--------------|-----------------------------------------------------------|---|---|---|
| 1225 | 1314 | excinuclease ABC subunit C                           | TAO_1062 | NHAL_3086 | NOC_1644    | NWAT_1484    | excinuclease ABC subunit C                                | * | * | * |
| 1226 | 1352 | malto-oligosyltrehalose trehalohydrolase             | TAO_1060 | NHAL_3101 | NOC_1681    | NWAT_1476    | malto-oligosyltrehalose trehalohydrolase                  | * | * | * |
| 1227 | 1437 | malto-oligosyltrehalose synthase                     | TAO_1059 | NHAL_3102 | NOC_1680    | NWAT_1475    | malto-oligosyltrehalose synthase                          | * | * | * |
| 1228 | 284  | hypothetical conserved protein                       | TAO_1058 | NHAL_3103 | NOC_1679    | NWAT_1474    | hypothetical protein                                      | * | * | * |
| 1229 | 1654 | -                                                    | -        | NHAL_3104 | NOC_1678    | NWAT_1473    | <b>hypothetical protein</b>                               | * | * | * |
| 1230 | 1052 | trigger factor                                       | TAO_1057 | NHAL_3105 | NOC_1677    | NWAT_1472    | trigger factor                                            | * | * | * |
| 1231 | 668  | ATP-dependent Clp protease proteolytic subunit       | TAO_1056 | NHAL_3106 | NOC_1676    | NWAT_1471    | ATP-dependent Clp protease proteolytic subunit ClpP       | * | * | * |
| 1232 | 1244 | ATP-dependent Clp protease ATP-binding subunit ClpX  | TAO_1055 | NHAL_3107 | NOC_1675    | NWAT_1470    | ATP-dependent Clp protease ATP-binding subunit ClpX       | * | * | * |
| 1233 | 1430 | ATP-dependent protease La                            | TAO_1054 | NHAL_3108 | NOC_1674    | NWAT_1469    | ATP-dependent protease La                                 | * | * | * |
| 1234 | 159  | sporulation domain-containing protein                | TAO_1053 | NHAL_3109 | NOC_1673    | NWAT_1468    | sporulation domain-containing protein                     | * | * | * |
| 1235 | 408  | colicin V production protein                         | TAO_1052 | NHAL_3110 | NOC_1672    | NWAT_1467    | colicin V production protein                              | * | * | * |
| 1236 | 1321 | amidophosphoribosyltransferase                       | TAO_1051 | NHAL_3111 | NOC_1671    | NWAT_1466    | amidophosphoribosyltransferase                            | * | * | * |
| 1237 | 254  | hypothetical conserved protein                       | TAO_1050 | NHAL_3112 | NOC_1670    | NWAT_1465    | hypothetical protein                                      | * | * | * |
| 1238 | 157  | 50S ribosomal protein L32                            | TAO_1049 | NHAL_3113 | NOC_1669    | NWAT_1464    | 50S ribosomal protein L32                                 | * | * | * |
| 1239 | 1000 | fatty acid/phospholipid synthesis protein plsX       | TAO_1048 | NHAL_3114 | NOC_1668    | NWAT_1463    | fatty acid/phospholipid synthesis protein plsX            | * | * | * |
| 1240 | 975  | 3-oxoacyl-ACP synthase                               | TAO_1047 | NHAL_3115 | NOC_1667    | NWAT_1462    | 3-oxoacyl-ACP synthase III                                | * | * | * |
| 1241 | 830  | malonyl coA-acyl carrier protein transacylase        | TAO_1046 | NHAL_3116 | NOC_1666    | NWAT_1461    | malonyl coA-acyl carrier protein transacylase             | * | * | * |
| 1242 | 663  | 3-oxoacyl-ACP reductase                              | TAO_1045 | NHAL_3117 | NOC_1665    | NWAT_1460    | 3-oxoacyl-ACP reductase                                   | * | * | * |
| 1243 | 211  | acyl carrier protein                                 | TAO_1044 | NHAL_3118 | NOC_1664    | NWAT_1459    | acyl carrier protein                                      | * | * | * |
| 1244 | 1167 | 3-oxoacyl-ACP synthase                               | TAO_1043 | NHAL_3119 | NOC_1663    | NWAT_1458    | 3-oxoacyl-ACP synthase                                    | * | * | * |
| 1245 | 723  | 4-amino-4-deoxychorismate lyase                      | TAO_1042 | NHAL_3120 | NOC_1662    | NWAT_1457    | 4-amino-4-deoxychorismate lyase                           | * | * | * |
| 1246 | 878  | aminodeoxychorismate lyase                           | TAO_1041 | NHAL_3121 | NOC_1661    | NWAT_1456    | aminodeoxychorismate lyase                                | * | * | * |
| 1247 | 542  | thymidylate kinase                                   | TAO_1040 | NHAL_3122 | NOC_1660    | NWAT_1455    | thymidylate kinase                                        | * | * | * |
| 1248 | 779  | DNA polymerase III subunit delta'                    | TAO_1039 | NHAL_3123 | NOC_1659    | NWAT_1454    | DNA polymerase III subunit delta'                         | * | * | * |
| 1249 | 250  | type IV pilus assembly pilZ                          | TAO_1038 | NHAL_3124 | NOC_1658    | NWAT_1453    | type IV pilus assembly pilZ                               | * | * | * |
| 1250 | 767  | TatD-related DNAase                                  | TAO_1037 | NHAL_3125 | NOC_1657    | NWAT_1452    | hydrolase, TatD family                                    | * | * | * |
| 1251 | 2335 | -                                                    | -        | NHAL_3126 |             | NWAT_1451    | <b>hypothetical protein</b>                               | * | * | * |
| 1252 | 1060 | class V aminotransferase                             | TAO_1036 | NHAL_3127 | NOC_1656    | NWAT_1450    | class V aminotransferase                                  | * | * | * |
| 1253 | 789  | DNA replication terminus site-binding family protein | TAO_1033 | NHAL_3129 | NOC_1655    | NWAT_1449    | DNA replication terminus site-binding family protein      | * | * | * |
| 1254 | 652  | HflBKC-binding inner membrane protein                | TAO_1007 | NHAL_1933 | NOC_1654    | NWAT_1448    | HflBKC-binding inner membrane protein                     | * | * | * |
| 1255 | 1456 | transcription-repair coupling factor                 | TAO_1028 | NHAL_3142 | NOC_1642    | NWAT_1486    | transcription-repair coupling factor                      | * | * | * |
| 1256 | 1667 | -                                                    | -        | NHAL_3143 | NOC_1641    | NWAT_1487    | <b>hypothetical protein</b>                               | * | * | * |
| 1257 | 2674 | -                                                    | -        | NHAL_3150 | NOC_1640    |              | <b>K+ transport systems NAD-binding component, TrkA-N</b> | * | * | * |
| 1258 | 2832 | -                                                    | -        | NHAL_3151 | NOC_1639    |              | <b>cation transporter</b>                                 | * | * | * |
| 1259 | 275  | hypothetical conserved protein                       | TAO_1027 | NHAL_3152 | NOC_1638    | NWAT_1491    | hypothetical protein                                      | * | * | * |
| 1260 | 1604 | -                                                    | -        | NHAL_3154 | NOC_1637    | NWAT_1492    | <b>hypothetical protein</b>                               | * | * | * |
| 1261 | 2117 | -                                                    | -        | NHAL_3155 | NOC_1636    | NWAT_1493    | <b>ribonuclease BN</b>                                    | * | * | * |
| 1262 | 238  | SPFH domain-containing protein family protein        | TAO_0333 | NHAL_3156 | NOC_1635    | NWAT_1494    | SPFH domain-containing protein family protein             | * | * | * |
| 1263 | 2083 | -                                                    | -        | NHAL_3157 | NOC_1634    | NWAT_1495    | <b>hypothetical protein</b>                               | * | * | * |
| 1264 | 146  | hypothetical protein                                 | TAO_1026 | NHAL_3158 | NOC_1633(1) | NWAT_1496(1) | thiamine biosynthesis protein thiS                        | * | * | * |
| 1265 | 1932 | -                                                    | -        | NHAL_3659 | NOC_0750    | NWAT_2363    | <b>group 1 glycosyl transferase</b>                       | * | * | * |
| 1266 | 210  | cytochrome C class I                                 | TAO_0154 | NHAL_3658 | NOC_0751    | NWAT_2362    | cytochrome c, class I                                     | * | * | * |
| 1267 | 13   | dolichol-phosphate mannosyltransferase               | TAO_1730 | NHAL_3657 | NOC_0752    | NWAT_2361    | family 2 glycosyl transferase                             | * | * | * |
| 1268 | 1689 | -                                                    | -        | NHAL_3656 | NOC_0753    | NWAT_2360    | <b>hypothetical protein</b>                               | * | * | * |
| 1269 | 2153 | -                                                    | -        | NHAL_3655 | NOC_0754    | NWAT_2357    | <b>hypothetical protein</b>                               | * | * | * |
| 1270 | 1360 | hypothetical conserved protein                       | TAO_0155 | NHAL_3654 | NOC_0755    | NWAT_2356    | hypothetical protein                                      | * | * | * |
| 1271 | 455  | general secretion pathway protein J                  | TAO_0156 | NHAL_3653 | NOC_0756    | NWAT_2355    | general secretion pathway protein J                       | * | * | * |
| 1272 | 706  | general secretion pathway protein K                  | TAO_0157 | NHAL_3652 | NOC_0757    | NWAT_2354    | general secretion pathway protein K                       | * | * | * |
| 1273 | 933  | fimbrial assembly family protein                     | TAO_0158 | NHAL_3651 | NOC_0758    | NWAT_2353    | fimbrial assembly family protein                          | * | * | * |
| 1274 | 493  | general secretion pathway protein M                  | TAO_0159 | NHAL_3650 | NOC_0759    | NWAT_2352    | general secretion pathway protein M                       | * | * | * |

|      |      |                                                             |                      |           |                      |           |                                                                            |   |   |   |
|------|------|-------------------------------------------------------------|----------------------|-----------|----------------------|-----------|----------------------------------------------------------------------------|---|---|---|
| 1275 | 304  | hypothetical conserved protein                              | TAO_0160             | NHAL_3649 | NOC_0760             | NWAT_2351 | hypothetical protein                                                       | * | * | * |
| 1276 | 1300 | general secretion pathway protein D                         | TAO_0161             | NHAL_3648 | NOC_0761             | NWAT_2350 | general secretion pathway protein D                                        | * | * | * |
| 1277 | 264  | hypothetical conserved protein                              | TAO_0162             | NHAL_3647 | NOC_0763             | NWAT_2346 | hypothetical protein                                                       | * | * | * |
| 1278 | 51   | hypothetical conserved protein                              | TAO_0163<br>TAO_0165 | NHAL_3646 | NOC_0764             | NWAT_2345 | hypothetical conserved protein                                             | * | * | * |
| 1279 | 634  | PpiC-type peptidyl-prolyl cis-trans isomerase               | TAO_0164             | NHAL_3644 | NOC_0767             | NWAT_2342 | PpiC-type peptidyl-prolyl cis-trans isomerase                              | * | * | * |
| 1280 | 1088 | ABC transporter ATP-binding protein                         | TAO_0167             | NHAL_3634 | NOC_2181             | NWAT_0905 | ABC transporter protein                                                    | * | * | * |
| 1281 | 1991 | -                                                           | -                    | NHAL_3633 | NOC_2180             | NWAT_0906 | hypothetical protein                                                       | * | * | * |
| 1282 | 143  | acetyltransferase                                           | TAO_0169             | NHAL_3307 | NOC_2179             | NWAT_0907 | acetyltransferase (isoleucine patch superfamily)-like protein              | * | * | * |
| 1283 | 1069 | glycosyl transferase family protein (divided, N-term side ) | TAO_0170             | NHAL_3631 | NOC_2178             | NWAT_0908 | family 2 glycosyl transferase                                              | * | * | * |
| 1284 | 1981 | -                                                           | -                    | NHAL_3630 | NOC_2177             | NWAT_0909 | rhamnosyltransferase                                                       | * | * | * |
| 1285 | 2039 | -                                                           | -                    | NHAL_3629 | NOC_2176             | NWAT_0910 | family 2 glycosyl transferase                                              | * | * | * |
| 1286 | 2724 | -                                                           | -                    | NHAL_3628 | NOC_2175             | -         | hypothetical protein                                                       | * | * | * |
| 1287 | 2096 | -                                                           | -                    | NHAL_3627 | NOC_2174             | NWAT_0912 | hypothetical protein                                                       | * | * | * |
| 1288 | 1865 | -                                                           | -                    | NHAL_3626 | NOC_2172<br>NOC_2173 | NWAT_0913 | haloacid dehalogenase domain-containing protein hydrolase                  | * | * | * |
| 1289 | 2170 | -                                                           | -                    | NHAL_3625 | NOC_2171             | NWAT_0914 | group 1 glycosyl transferase                                               | * | * | * |
| 1290 | 2210 | -                                                           | -                    | NHAL_3624 | NOC_2170             | NWAT_0915 | hypothetical protein                                                       | * | * | * |
| 1291 | 2254 | -                                                           | -                    | NHAL_3623 | NOC_2169             | NWAT_0916 | peptidase S8 and S53 subtilisin kexin sedolisin                            | * | * | * |
| 1292 | 958  | family 2 glycosyl transferase                               | TAO_0172             | NHAL_3622 | NOC_2168             | NWAT_0917 | family 2 glycosyl transferase                                              | * | * | * |
| 1293 | 916  | NAD-dependent epimerase/dehydratase                         | TAO_0173             | NHAL_3621 | NOC_2167             | NWAT_0918 | NAD-dependent epimerase/dehydratase                                        | * | * | * |
| 1294 | 1701 | -                                                           | -                    | NHAL_3620 | NOC_2166             | NWAT_0919 | flagellar basal body-associated protein FliL                               | * | * | * |
| 1295 | 1958 | -                                                           | -                    | NHAL_3619 | NOC_2165             | NWAT_0920 | flagellar motor switch protein FliM                                        | * | * | * |
| 1296 | 1655 | -                                                           | -                    | NHAL_3618 | NOC_2164             | NWAT_0921 | flagellar motor switch protein FliN                                        | * | * | * |
| 1297 | 1648 | -                                                           | -                    | NHAL_3617 | NOC_2163             | NWAT_0922 | flagellar biosynthesis protein, FliO                                       | * | * | * |
| 1298 | 1908 | -                                                           | -                    | NHAL_3616 | NOC_2162             | NWAT_0923 | flagellar biosynthetic protein FliP                                        | * | * | * |
| 1299 | 1592 | -                                                           | -                    | NHAL_3615 | NOC_2161             | NWAT_0924 | flagellar biosynthetic protein FliQ                                        | * | * | * |
| 1300 | 1883 | -                                                           | -                    | NHAL_3614 | NOC_2160             | NWAT_0925 | flagellar biosynthetic protein FliR                                        | * | * | * |
| 1301 | 2051 | -                                                           | -                    | NHAL_3613 | NOC_2159             | NWAT_0926 | flagellar biosynthetic protein FliB                                        | * | * | * |
| 1302 | 2244 | -                                                           | -                    | NHAL_3612 | NOC_2158             | NWAT_0927 | flagellar biosynthesis protein FliA                                        | * | * | * |
| 1303 | 2031 | -                                                           | -                    | NHAL_3611 | NOC_2157             | NWAT_0928 | GTP-binding signal recognition particle SRP54 G- domain-containing protein | * | * | * |
| 1304 | 1957 | -                                                           | -                    | NHAL_3610 | NOC_2156             | NWAT_0929 | cobyrinic acid a,c-diamide synthase                                        | * | * | * |
| 1305 | 646  | FliA/WhiG family RNA polymerase sigma factor                | TAO_0174             | NHAL_3609 | NOC_2155             | NWAT_0930 | FliA/WhiG subfamily RNA polymerase sigma 28 subunit                        | * | * | * |
| 1306 | 1661 | -                                                           | -                    | NHAL_3606 | NOC_2154             | NWAT_0931 | hypothetical protein                                                       | * | * | * |
| 1307 | 147  | hypothetical protein                                        | TAO_0175             | NHAL_3605 | NOC_2153             | NWAT_0932 | pentapeptide repeat-containing protein                                     | * | * | * |
| 1308 | 1032 | integral membrane protein terC                              | TAO_0176             | NHAL_3601 | NOC_2152             | NWAT_0934 | integral membrane protein terC                                             | * | * | * |
| 1309 | 1450 | mechanosensitive ion channel protein MscS                   | TAO_0177             | NHAL_3600 | NOC_2151             | NWAT_0935 | mechanosensitive ion channel protein MscS                                  | * | * | * |
| 1310 | 1922 | -                                                           | -                    | NHAL_2042 | NOC_2150             | NWAT_0936 | hypothetical protein                                                       | * | * | * |
| 1311 | 1907 | -                                                           | -                    | NHAL_2041 | NOC_2149             | NWAT_0937 | hypothetical protein                                                       | * | * | * |
| 1312 | 1896 | -                                                           | -                    | NHAL_2040 | NOC_2148             | NWAT_0938 | heat shock protein DnaJ domain-containing protein                          | * | * | * |
| 1313 | 1750 | -                                                           | -                    | NHAL_2038 | NOC_2147             | NWAT_0939 | hypothetical protein                                                       | * | * | * |
| 1314 | 1709 | -                                                           | -                    | NHAL_2037 | NOC_2146             | NWAT_0940 | polyketide cyclase/dehydrase                                               | * | * | * |
| 1315 | 2103 | -                                                           | -                    | NHAL_2036 | NOC_2145             | NWAT_0941 | L-sorbose dehydrogenase                                                    | * | * | * |
| 1316 | 2233 | -                                                           | -                    | NHAL_2035 | NOC_2144             | NWAT_0943 | hypothetical protein                                                       | * | * | * |
| 1317 | 1976 | -                                                           | -                    | NHAL_1153 | NOC_2142             | NWAT_0945 | ABC transporter-like protein                                               | * | * | * |
| 1318 | 2280 | -                                                           | -                    | NHAL_1154 | NOC_2141             | NWAT_0946 | ABC transporter inner membrane protein                                     | * | * | * |
| 1319 | 1977 | -                                                           | -                    | NHAL_1155 | NOC_2140             | NWAT_0947 | hypothetical protein                                                       | * | * | * |
| 1320 | 2124 | -                                                           | -                    | NHAL_1160 | NOC_2139             | NWAT_0948 | protease Do                                                                | * | * | * |
| 1321 | 1596 | -                                                           | -                    | NHAL_1172 | NOC_2138             | NWAT_0949 | hypothetical protein                                                       | * | * | * |
| 1322 | 2041 | -                                                           | -                    | NHAL_1175 | NOC_2137             | NWAT_0950 | hypothetical protein                                                       | * | * | * |
| 1323 | 1371 | thiol-disulfide oxidoreductase DCC                          | TAO_1175             | NHAL_1176 | NOC_2136             | NWAT_0952 | putative thiol-disulfide oxidoreductase DCC                                | * | * | * |

|      |      |                                                                                                         |          |           |          |           |                                                                                                           |   |   |   |
|------|------|---------------------------------------------------------------------------------------------------------|----------|-----------|----------|-----------|-----------------------------------------------------------------------------------------------------------|---|---|---|
| 1324 | 335  | hypothetical conserved protein                                                                          | TAO_1174 | NHAL_1177 | NOC_2135 | NWAT_0953 | hypothetical protein                                                                                      | * | * | * |
| 1325 | 2139 | -                                                                                                       | -        | NHAL_1178 | NOC_2134 | NWAT_0954 | Na+/H+ antiporter NhaC-like protein                                                                       | * |   |   |
| 1326 | 2667 | -                                                                                                       | -        | NHAL_1183 | NOC_2133 |           | transmembrane phospholipase                                                                               | * |   |   |
| 1327 | 1879 | -                                                                                                       | -        | NHAL_1184 | NOC_2132 | NWAT_0956 | endonuclease/exonuclease/phosphatase                                                                      | * |   |   |
| 1328 | 711  | pyrimidine reductase, riboflavin biosynthesis, ribD                                                     | TAO_1173 | NHAL_1185 | NOC_2131 | NWAT_0957 | bifunctional deaminase-reductase domain-containing protein                                                | * | * | * |
| 1329 | 2271 | -                                                                                                       | -        | NHAL_1189 | NOC_2130 | NWAT_0959 | cation transporting ATPase, E1-E2 type                                                                    | * |   |   |
| 1330 | 1170 | alanine--glyoxylate aminotransferase                                                                    | TAO_1292 | NHAL_2764 | NOC_2128 | NWAT_0960 | class V aminotransferase                                                                                  | * | * | * |
| 1331 | 914  | hypothetical conserved protein                                                                          | TAO_1291 | NHAL_2765 | NOC_2127 | NWAT_0961 | hypothetical protein                                                                                      | * | * | * |
| 1332 | 1078 | succinyl-diaminopimelate desuccinylase                                                                  | TAO_1290 | NHAL_2766 | NOC_2126 | NWAT_0962 | succinyl-diaminopimelate desuccinylase                                                                    | * | * | * |
| 1333 | 901  | 2,3,4,5-tetrahydropyridine-2,6-carboxylate N-succinyltransferase                                        | TAO_1289 | NHAL_2767 | NOC_2125 | NWAT_0963 | 2,3,4,5-tetrahydropyridine-2,6-dicarboxylate N-succinyltransferase                                        | * | * | * |
| 1334 | 2101 | -                                                                                                       | -        | NHAL_2768 | NOC_2124 | NWAT_0964 | class I and II aminotransferase                                                                           | * |   |   |
| 1335 | 1964 | ATPase AAA superfamily                                                                                  | TAO_1287 |           | NOC_2123 | NWAT_0965 | ATPase AAA superfamily                                                                                    | * |   |   |
| 1336 | 387  | ribosome maturation protein rimP                                                                        | TAO_1286 | NHAL_2769 | NOC_2122 | NWAT_0966 | ribosome maturation protein rimP                                                                          | * | * | * |
| 1337 | 1284 | transcription elongation factor NusA                                                                    | TAO_1285 | NHAL_2770 | NOC_2121 | NWAT_0967 | transcription termination factor NusA                                                                     | * | * | * |
| 1338 | 1410 | translation initiation factor IF-2                                                                      | TAO_1284 | NHAL_2771 | NOC_2120 | NWAT_0968 | translation initiation factor IF-2                                                                        | * | * | * |
| 1339 | 287  | ribosome-binding factor A                                                                               | TAO_1283 | NHAL_2772 | NOC_2119 | NWAT_0969 | ribosome-binding factor A                                                                                 | * | * | * |
| 1340 | 865  | tRNA pseudouridine synthase B                                                                           | TAO_1282 | NHAL_2773 | NOC_2118 | NWAT_0970 | tRNA pseudouridine synthase B                                                                             | * | * | * |
| 1341 | 236  | 30S ribosomal protein S15                                                                               | TAO_1281 | NHAL_2774 | NOC_2117 | NWAT_0971 | 30S ribosomal protein S15                                                                                 | * | * | * |
| 1342 | 1403 | polyribonucleotide nucleotidyltransferase                                                               | TAO_1280 | NHAL_2775 | NOC_2116 | NWAT_0972 | polyribonucleotide nucleotidyltransferase                                                                 | * | * | * |
| 1343 | 1434 | glycogen/starch/alpha-glucan phosphorylase                                                              | TAO_1279 | NHAL_2776 | NOC_2115 | NWAT_0973 | glycogen/starch/alpha-glucan phosphorylase                                                                | * | * | * |
| 1344 | 2226 | -                                                                                                       | -        | NHAL_2777 | NOC_2114 | NWAT_0974 | hypothetical protein                                                                                      | * |   |   |
| 1345 | 1843 | -                                                                                                       | -        | NHAL_2778 | NOC_2113 | NWAT_0976 | β-hydroxyacyl-(acyl-carrier-protein) dehydratase fabA                                                     | * |   |   |
| 1346 | 806  | hypothetical conserved protein                                                                          | TAO_1278 | NHAL_2779 | NOC_2112 | NWAT_0977 | hypothetical protein                                                                                      | * | * | * |
| 1347 | 1100 | pyruvate dehydrogenase (acetyl-transferring) E1 component subunit alpha                                 | TAO_1277 | NHAL_2780 | NOC_2111 | NWAT_0978 | pyruvate dehydrogenase E1 component subunit alpha                                                         | * | * | * |
| 1348 | 1061 | pyruvate/2-oxoglutarate dehydrogenase complex dehydrogenase (E1) component                              | TAO_1276 | NHAL_2781 | NOC_2110 | NWAT_0979 | pyruvate/2-oxoglutarate dehydrogenase complex dehydrogenase component                                     | * | * | * |
| 1349 | 1427 | pyruvate/2-oxoglutarate dehydrogenase complex dihydrolipoamide dehydrogenase (E3) component and related | TAO_1275 | NHAL_2782 | NOC_2109 | NWAT_0980 | pyruvate/2-oxoglutarate dehydrogenase complex dihydrolipoamide dehydrogenase component and related enzyme | * | * | * |
| 1350 | 1214 | argininosuccinate synthase                                                                              | TAO_1274 | NHAL_2783 | NOC_2108 | NWAT_0981 | argininosuccinate synthase                                                                                | * | * | * |
| 1351 | 1850 | -                                                                                                       | -        | NHAL_2784 | NOC_2107 | NWAT_0982 | NolW domain-containing protein                                                                            | * |   |   |
| 1352 | 1256 | adenylosuccinate lyase                                                                                  | TAO_1271 | NHAL_2785 | NOC_2106 | NWAT_0983 | adenylosuccinate lyase                                                                                    | * | * | * |
| 1353 | 1933 | -                                                                                                       | -        | NHAL_2786 | NOC_2105 | NWAT_0984 | hypothetical protein                                                                                      | * |   |   |
| 1354 | 629  | competence protein F                                                                                    | TAO_0600 | NHAL_0763 | NOC_2102 | NWAT_0986 | competence protein F                                                                                      | * | * | * |
| 1355 | 1001 | biotin synthase                                                                                         | TAO_0601 | NHAL_0764 | NOC_2101 | NWAT_0987 | biotin synthase                                                                                           | * | * | * |
| 1356 | 1070 | 8-amino-7-oxononanoate synthase                                                                         | TAO_0602 | NHAL_0765 | NOC_2100 | NWAT_0988 | 8-amino-7-oxononanoate synthase                                                                           | * | * | * |
| 1357 | 480  | carboxylesterase of pimeloyl-coA synthesis, bioH                                                        | TAO_0603 | NHAL_0766 | NOC_2099 | NWAT_0989 | carboxylesterase of pimeloyl-coA synthesis, bioH                                                          | * | * | * |
| 1358 | 804  | biotin biosynthesis protein BioC                                                                        | TAO_0604 | NHAL_0767 | NOC_2098 | NWAT_0990 | biotin biosynthesis protein bioC                                                                          | * | * | * |
| 1359 | 559  | dethiobiotin synthase                                                                                   | TAO_0605 | NHAL_0768 | NOC_2097 | NWAT_0991 | dethiobiotin synthase                                                                                     | * | * | * |
| 1360 | 1828 | -                                                                                                       | -        | NHAL_0769 | NOC_2096 | NWAT_0992 | toluene tolerance family protein                                                                          | * |   |   |
| 1361 | 1381 | NAD+ synthetase                                                                                         | TAO_0607 | NHAL_0770 | NOC_2095 | NWAT_0993 | NAD+ synthetase                                                                                           | * | * | * |
| 1362 | 2803 | -                                                                                                       | -        |           | NOC_2091 | NWAT_0997 | hypothetical protein                                                                                      | * |   |   |
| 1363 | 1659 | -                                                                                                       | -        | NHAL_0774 | NOC_2090 | NWAT_0998 | hypothetical protein                                                                                      | * |   |   |
| 1364 | 1620 | -                                                                                                       | -        | NHAL_0777 | NOC_2089 | NWAT_0999 | H+-ATPase subunit H                                                                                       | * |   |   |
| 1365 | 2008 | -                                                                                                       | -        | NHAL_0778 | NOC_2088 | NWAT_1000 | H+-transporting two-sector ATPase C subunit                                                               | * |   |   |
| 1366 | 2220 | -                                                                                                       | -        | NHAL_0779 | NOC_2087 | NWAT_1001 | V-type ATPase, 116 kDa subunit                                                                            | * |   |   |
| 1367 | 1688 | -                                                                                                       | -        | NHAL_0780 | NOC_2086 | NWAT_1002 | H+-transporting two-sector ATPase subunit C                                                               | * |   |   |
| 1368 | 1660 | -                                                                                                       | -        | NHAL_0781 | NOC_2085 | NWAT_1003 | hypothetical protein                                                                                      | * |   |   |
| 1369 | 1818 | -                                                                                                       | -        | NHAL_0782 | NOC_2084 | NWAT_1004 | H+-transporting two-sector ATPase subunit E                                                               | * |   |   |
| 1370 | 2223 | -                                                                                                       | -        | NHAL_0783 | NOC_2083 | NWAT_1005 | H(+)-transporting two-sector ATPase                                                                       | * |   |   |
| 1371 | 2158 | -                                                                                                       | -        | NHAL_0784 | NOC_2082 | NWAT_1006 | H(+)-transporting two-sector ATPase                                                                       | * |   |   |

|      |      |                                                            |                    |           |          |           |                                                                 |   |   |   |
|------|------|------------------------------------------------------------|--------------------|-----------|----------|-----------|-----------------------------------------------------------------|---|---|---|
| 1372 | 1845 | -                                                          | -                  | NHAL_0785 | NOC_2081 | NWAT_1007 | <b>V-type ATPase subunit D</b>                                  | * |   |   |
| 1373 | 576  | <b>methionine sulfoxide reductase A</b>                    | <b>TAO_1140</b>    | NHAL_2915 | NOC_2080 | NWAT_1017 | peptide methionine sulfoxide reductase                          | * | * | * |
| 1374 | 328  | <b>hypothetical conserved protein</b>                      | <b>TAO_1139</b>    | NHAL_2916 | NOC_2079 | NWAT_1018 | hypothetical protein                                            | * | * | * |
| 1375 | 1808 | <b>phosphoesterase, PA-phosphatase related</b>             | <b>TAO_1136</b>    | -         | NOC_2078 | NWAT_1019 | phosphoesterase, PA-phosphatase related                         | * |   |   |
| 1376 | 765  | <b>6-phosphogluconate dehydrogenase</b>                    | <b>TAO_1135</b>    | NHAL_1873 | NOC_2077 | NWAT_1020 | 6-phosphogluconate dehydrogenase                                | * | * | * |
| 1377 | 1452 | <b>peptidase M16C associated domain-containing protein</b> | <b>TAO_1134</b>    | NHAL_1875 | NOC_2076 | NWAT_1021 | peptidase M16C associated domain-containing protein             | * | * | * |
| 1378 | 635  | <b>HAD-superfamily hydrolase</b>                           | <b>TAO_1133</b>    | NHAL_1876 | NOC_2075 | NWAT_1022 | HAD-superfamily hydrolase                                       | * | * | * |
| 1379 | 861  | <b>Hsp33 chaperonin</b>                                    | <b>TAO_1132</b>    | NHAL_1877 | NOC_2074 | NWAT_1023 | Hsp33 chaperonin                                                | * | * | * |
| 1380 | 138  | -                                                          | -                  | NHAL_1993 | NOC_2071 | NWAT_1029 | <b>plasmid stabilization system protein</b>                     | * |   |   |
| 1381 | 2186 | -                                                          | -                  | NHAL_1880 | NOC_2066 | NWAT_1034 | <b>RNA polymerase sigma 70 subunit RpoD</b>                     | * |   |   |
| 1382 | 1543 | <b>fatty acyltransferase-like protein</b>                  | <b>TAO_1742</b>    | -         | NOC_2065 | NWAT_1035 | G-D-S-I family lipolytic protein                                | * |   |   |
| 1383 | 1708 | -                                                          | -                  | NHAL_0201 | NOC_2063 | NWAT_1036 | <b>hypothetical protein</b>                                     | * |   |   |
| 1384 | 1308 | <b>glucose-6-phosphate 1-dehydrogenase</b>                 | <b>TAO_1321</b>    | NHAL_2848 | NOC_2062 | NWAT_1038 | glucose-6-phosphate 1-dehydrogenase                             | * | * | * |
| 1385 | 1223 | <b>6-phosphogluconate dehydrogenase</b>                    | <b>TAO_1320</b>    | NHAL_2849 | NOC_2061 | NWAT_1039 | 6-phosphogluconate dehydrogenase                                | * | * | * |
| 1386 | 2698 | -                                                          | -                  | -         | NOC_2060 | NWAT_1040 | <b>MarR family transcriptional regulator</b>                    | * |   |   |
| 1387 | 2619 | -                                                          | -                  | -         | NOC_2059 | NWAT_1041 | <b>hypothetical protein</b>                                     | * |   |   |
| 1388 | 2567 | -                                                          | -                  | -         | NOC_2058 | NWAT_1042 | <b>hypothetical protein</b>                                     | * |   |   |
| 1389 | 2046 | -                                                          | -                  | NHAL_2853 | NOC_2057 | NWAT_1043 | <b>transaldolase</b>                                            | * |   |   |
| 1390 | 2676 | -                                                          | -                  | -         | NOC_2056 | NWAT_1045 | <b>hypothetical protein</b>                                     | * |   |   |
| 1391 | 2082 | -                                                          | -                  | NHAL_2852 | NOC_2055 | NWAT_1046 | <b>hypothetical protein</b>                                     | * |   |   |
| 1392 | 2078 | -                                                          | -                  | NHAL_2851 | NOC_2054 | NWAT_1051 | <b>Glu/Leu/phe/Val dehydrogenase</b>                            | * |   |   |
| 1393 | 920  | <b>glucoamylase</b>                                        | <b>TAO_0755</b>    | NHAL_2850 | NOC_2053 | NWAT_1053 | glycoside hydrolase 15-like protein                             | * | * | * |
| 1394 | 2011 | <b>HigA family addiction module antidote protein</b>       | <b>TAO_1701(2)</b> | -         | NOC_0681 | NWAT_2457 | HigA family addiction module antidote protein                   | * |   |   |
| 1395 | 1318 | <b>GMP synthase, large subunit</b>                         | <b>TAO_1702</b>    | NHAL_3752 | NOC_0614 | NWAT_2480 | GMP synthase, large subunit                                     | * | * | * |
| 1396 | 1280 | <b>inosine-5'-monophosphate dehydrogenase</b>              | <b>TAO_1703</b>    | NHAL_3753 | NOC_0613 | NWAT_2481 | inosine-5'-monophosphate dehydrogenase                          | * | * | * |
| 1397 | 1105 | <b>exodeoxyribonuclease VII large subunit</b>              | <b>TAO_1704</b>    | NHAL_3754 | NOC_0612 | NWAT_2482 | exodeoxyribonuclease VII large subunit                          | * | * | * |
| 1398 | 2350 | -                                                          | -                  | NHAL_3755 | -        | NWAT_2483 | <b>hypothetical protein</b>                                     | * |   |   |
| 1399 | 993  | <b>hypothetical conserved protein</b>                      | <b>TAO_0313</b>    | NHAL_3756 | NOC_0611 | NWAT_2484 | hypothetical protein                                            | * | * | * |
| 1400 | 484  | <b>TonB-like protein</b>                                   | <b>TAO_0312</b>    | NHAL_3757 | NOC_0610 | NWAT_2485 | TonB-like protein                                               | * | * | * |
| 1401 | 312  | <b>biopolymertransporter exbD/TolR</b>                     | <b>TAO_0311</b>    | NHAL_3758 | NOC_0609 | NWAT_2486 | biopolymer transport protein exbD/TolR                          | * | * | * |
| 1402 | 469  | <b>MotA/TolQ/exbB proton channel</b>                       | <b>TAO_0310</b>    | NHAL_3759 | NOC_0608 | NWAT_2487 | MotA/TolQ/exbB proton channel                                   | * | * | * |
| 1403 | 1112 | <b>MotA/TolQ/exbB proton channel</b>                       | <b>TAO_0309</b>    | NHAL_3760 | NOC_0607 | NWAT_2488 | MotA/TolQ/exbB proton channel                                   | * | * | * |
| 1404 | 745  | <b>hypothetical conserved protein</b>                      | <b>TAO_0308</b>    | NHAL_3761 | NOC_0606 | NWAT_2489 | hypothetical protein                                            | * | * | * |
| 1405 | 200  | <b>rubredoxin-type Fe(cys)4 protein</b>                    | <b>TAO_0307</b>    | NHAL_3763 | NOC_0605 | NWAT_2490 | rubredoxin-type Fe(cys)4 protein                                | * | * | * |
| 1406 | 528  | <b>thiamine-phosphate pyrophosphorylase</b>                | <b>TAO_0306</b>    | NHAL_3764 | NOC_0604 | NWAT_2491 | thiamine-phosphate pyrophosphorylase                            | * | * | * |
| 1407 | 771  | <b>thioredoxin</b>                                         | <b>TAO_0305</b>    | NHAL_3765 | NOC_0603 | NWAT_2492 | thioredoxin                                                     | * | * | * |
| 1408 | 1138 | <b>mechanosensitive ion channel MscS</b>                   | <b>TAO_0304</b>    | NHAL_3766 | NOC_0602 | NWAT_2493 | mechanosensitive ion channel MscS                               | * | * | * |
| 1409 | 2544 | -                                                          | -                  | -         | NOC_0601 | NWAT_2494 | <b>small multidrug resistance protein</b>                       | * |   |   |
| 1410 | 1211 | <b>glutamate-1-semialdehyde-2,1-aminomutase</b>            | <b>TAO_0288</b>    | NHAL_3767 | NOC_0600 | NWAT_2495 | glutamate-1-semialdehyde-2,1-aminomutase                        | * | * | * |
| 1411 | 1388 | <b>DNA helicase II / ATP-dependent DNA helicase PcrA</b>   | <b>TAO_0287</b>    | NHAL_3769 | NOC_0599 | NWAT_2496 | DNA-dependent helicase II                                       | * | * | * |
| 1412 | 2073 | -                                                          | -                  | NHAL_3770 | NOC_0598 | NWAT_2497 | <b>TRAP dicarboxylate transporter subunit DctP</b>              | * |   |   |
| 1413 | 1834 | -                                                          | -                  | NHAL_3771 | NOC_0597 | NWAT_2498 | <b>Sel1 domain-containing protein repeat-containing protein</b> | * |   |   |
| 1414 | 1935 | -                                                          | -                  | NHAL_3773 | NOC_0596 | NWAT_2499 | <b>hypothetical protein</b>                                     | * |   |   |
| 1415 | 429  | <b>cation diffusion facilitator family transporter</b>     | <b>TAO_0851</b>    | NHAL_3774 | NOC_0595 | NWAT_2500 | cation diffusion facilitator family transporter                 | * | * | * |
| 1416 | 1877 | -                                                          | -                  | NHAL_3776 | NOC_0594 | NWAT_2501 | <b>metallophosphoesterase</b>                                   | * |   |   |
| 1417 | 1967 | -                                                          | -                  | NHAL_3777 | NOC_0593 | NWAT_2502 | <b>rhodanese domain-containing protein</b>                      | * |   |   |
| 1418 | 374  | <b>zinc dependent protease family protein</b>              | <b>TAO_0286</b>    | NHAL_3779 | NOC_0580 | NWAT_2503 | zinc dependent protease family protein                          | * | * | * |
| 1419 | 653  | <b>hypothetical conserved protein</b>                      | <b>TAO_1593</b>    | NHAL_3384 | NOC_0579 | NWAT_2504 | hypothetical protein                                            | * | * | * |
| 1420 | 833  | <b>glycosyl transferase family protein</b>                 | <b>TAO_1594</b>    | NHAL_3385 | NOC_0578 | NWAT_2505 | glycosyl transferase family protein                             | * | * | * |
| 1421 | 248  | <b>glycosyl transferase family protein</b>                 | <b>TAO_1595</b>    | NHAL_3386 | NOC_0577 | NWAT_2506 | group 1 glycosyl transferase                                    | * | * | * |

|      |      |                                                                   |             |              |          |           |                                                                                    |   |   |   |
|------|------|-------------------------------------------------------------------|-------------|--------------|----------|-----------|------------------------------------------------------------------------------------|---|---|---|
| 1422 | 939  | glycosyl transferase family protein                               | TAO_1596    | NHAL_3387    | NOC_0576 | NWAT_2513 | glycosyl transferase family protein                                                | * | * | * |
| 1423 | 2092 | -                                                                 | -           | NHAL_3388    | NOC_0562 | NWAT_0595 | <b>O-antigen polymerase</b>                                                        | * |   |   |
| 1424 | 972  | glycosyl transferase family protein                               | TAO_0267    | NHAL_3389    | NOC_0561 | NWAT_0594 | glycosyl transferase family protein                                                | * | * | * |
| 1425 | 1033 | group 1 glycosyl transferase                                      | TAO_0266    | NHAL_3390    | NOC_0560 | NWAT_0593 | group 1 glycosyl transferase                                                       | * | * | * |
| 1426 | 124  | hypothetical conserved protein                                    | TAO_0749    | NHAL_3391    | NOC_0559 | NWAT_0592 | hypothetical protein                                                               | * | * | * |
| 1427 | 909  | spermidine synthase                                               | TAO_0265    | NHAL_3392    | NOC_0558 | NWAT_0591 | spermidine synthase                                                                | * | * | * |
| 1428 | 1377 | arginine decarboxylase                                            | TAO_0264    | NHAL_3394    | NOC_0557 | NWAT_0590 | arginine decarboxylase                                                             | * | * | * |
| 1429 | 223  | hypothetical conserved protein                                    | TAO_0263    | NHAL_3395    | NOC_0556 | NWAT_0589 | hypothetical protein                                                               | * | * | * |
| 1430 | 83   | hypothetical conserved protein                                    | TAO_1351    | NHAL_3396    | NOC_0555 | NWAT_0588 | hypothetical protein                                                               | * | * | * |
| 1431 | 1432 | DNA polymerase I                                                  | TAO_0262    | NHAL_3397    | NOC_0554 | NWAT_0587 | DNA polymerase I                                                                   | * | * | * |
| 1432 | 574  | GTP-binding protein HSR1-related                                  | TAO_0261    | NHAL_3399    | NOC_0553 | NWAT_0586 | GTP-binding protein HSR1 protein                                                   | * | * | * |
| 1433 | 521  | cytochrome C class I                                              | TAO_0260    | NHAL_3400    | NOC_0552 | NWAT_0585 | cytochrome c class I                                                               | * | * | * |
| 1434 | 554  | DSBA oxidoreductase                                               | TAO_0259    | NHAL_3401    | NOC_0551 | NWAT_0584 | DSBA oxidoreductase                                                                | * | * | * |
| 1435 | 2880 | -                                                                 | -           | NHAL_3590    | NOC_2225 |           | <b>small GTP-binding protein</b>                                                   | * |   |   |
| 1436 | 309  | pterin-4-alpha-carbinolamine dehydratase                          | TAO_0181    | NHAL_3591    | NOC_2226 | NWAT_0862 | pterin-4-alpha-carbinolamine dehydratase                                           | * | * | * |
| 1437 | 698  | membrane-bound metal-dependent hydrolase                          | TAO_0180    | NHAL_3592    | NOC_2227 | NWAT_0861 | membrane-bound metal-dependent hydrolase                                           | * | * | * |
| 1438 | 1900 | -                                                                 | -           | NHAL_3593    | NOC_2228 | NWAT_0860 | <b>hypothetical protein</b>                                                        | * |   |   |
| 1439 | 2284 | -                                                                 | -           | NHAL_3594    | NOC_2229 | NWAT_0859 | <b>diguanylate cyclase/phosphodiesterase</b>                                       | * |   |   |
| 1440 | 1926 | -                                                                 | -           | NHAL_3595    | NOC_2230 | NWAT_0858 | <b>hypothetical protein</b>                                                        | * |   |   |
| 1441 | 1966 | -                                                                 | -           | NHAL_3596    | NOC_2231 | NWAT_0857 | <b>polyprenyl synthetase</b>                                                       | * |   |   |
| 1442 | 1918 | -                                                                 | -           | NHAL_3597    | NOC_2232 | NWAT_0856 | <b>methyltransferase type 11</b>                                                   | * |   |   |
| 1443 | 209  | hypothetical conserved protein                                    | TAO_0178    | NHAL_3598    | NOC_2233 | NWAT_0855 | hypothetical protein                                                               | * | * | * |
| 1444 | 1898 | -                                                                 | -           | NHAL_3599    | NOC_2234 | NWAT_0854 | <b>integral membrane protein terC</b>                                              | * |   |   |
| 1445 | 302  | small multidrug resistance protein                                | TAO_0183    | NHAL_3581    | NOC_2235 | NWAT_0853 | small multidrug resistance protein                                                 | * | * | * |
| 1446 | 657  | glutamine amidotransferase                                        | TAO_0182    | NHAL_3583    | NOC_2237 | NWAT_0851 | glutamine amidotransferase                                                         | * | * | * |
| 1447 | 1589 | -                                                                 | -           | NHAL_0940    | NOC_2241 | NWAT_0832 | <b>hypothetical protein</b>                                                        | * |   |   |
| 1448 | 1566 | -                                                                 | -           | NHAL_0941    | NOC_2242 | NWAT_0831 | <b>hypothetical protein</b>                                                        | * |   |   |
| 1449 | 1499 | hypothetical conserved protein                                    | TAO_PL_0006 | NHAL_0978(1) | NOC_2243 |           | hypothetical conserved protein                                                     | * |   |   |
| 1450 | 2010 | -                                                                 | -           | NHAL_2574    | NOC_0403 | NWAT_2706 | <b>metallophosphoesterase</b>                                                      | * |   |   |
| 1451 | 168  | peptidase M48 family protein                                      | TAO_1636    | NHAL_2573    | NOC_0402 | NWAT_2707 | peptidase M48, Ste24p                                                              | * | * | * |
| 1452 | 1506 | -                                                                 | -           | NHAL_3262    | NOC_0399 | NWAT_2712 | <b>hypothetical protein</b>                                                        | * |   |   |
| 1453 | 1526 | -                                                                 | -           | NHAL_3263    | NOC_0398 | NWAT_2713 | <b>hypothetical protein</b>                                                        | * |   |   |
| 1454 | 2598 | -                                                                 | -           |              | NOC_0396 | NWAT_2716 | <b>excalibur domain-containing protein</b>                                         | * |   |   |
| 1455 | 2021 | -                                                                 | -           | NHAL_0236    | NOC_0394 | NWAT_2718 | <b>hypothetical protein</b>                                                        | * |   |   |
| 1456 | 717  | modification methylase HemK                                       | TAO_1668    | NHAL_0235    | NOC_0393 | NWAT_2719 | hemK family modification methylase                                                 | * | * | * |
| 1457 | 1901 | -                                                                 | -           | NHAL_0234    | NOC_0392 | NWAT_2720 | <b>response regulator receiver protein</b>                                         | * |   |   |
| 1458 | 2150 | -                                                                 | -           | NHAL_0232    | NOC_0391 | NWAT_2721 | <b>aldehyde dehydrogenase</b>                                                      | * |   |   |
| 1459 | 922  | NAD-dependent epimerase/dehydratase                               | TAO_1669    | NHAL_0231    | NOC_0390 | NWAT_2722 | NAD-dependent epimerase/dehydratase                                                | * | * | * |
| 1460 | 1137 | polynucleotide adenyltransferase/metal dependent phosphohydrolase | TAO_1670    | NHAL_0230    | NOC_0389 | NWAT_2723 | polynucleotide adenyltransferase/metal dependent phosphohydrolase                  | * | * | * |
| 1461 | 2160 | -                                                                 | -           | NHAL_0229    | NOC_0379 | NWAT_2724 | <b>aminoglycoside phosphotransferase</b>                                           | * |   |   |
| 1462 | 2276 | -                                                                 | -           | NHAL_0422    | NOC_0378 | NWAT_2725 | <b>5-oxoprolinase</b>                                                              | * |   |   |
| 1463 | 1545 | -                                                                 | -           | NHAL_0225    | NOC_0377 | NWAT_2726 | <b>peptidase M48 Ste24p</b>                                                        | * |   |   |
| 1464 | 2236 | -                                                                 | -           | NHAL_0222    | NOC_0376 | NWAT_2727 | <b>response regulator receiver modulated diguanylate cyclase/phosphodiesterase</b> | * |   |   |
| 1465 | 784  | 1-acyl-sn-glycerol-3-phosphate acyltransferase                    | TAO_0152    | NHAL_0221    | NOC_0375 | NWAT_2728 | phospholipid/glycerol acyltransferase                                              | * | * | * |
| 1466 | 490  | histidinol-phosphate phosphatase                                  | TAO_0151    | NHAL_0220    | NOC_0374 | NWAT_2729 | histidinol-phosphate phosphatase                                                   | * | * | * |
| 1467 | 1372 | glycyl-tRNA synthetase subunit beta                               | TAO_0150    | NHAL_0219    | NOC_0373 | NWAT_2730 | glycyl-tRNA synthetase subunit beta                                                | * | * | * |
| 1468 | 1054 | glycyl-tRNA synthetase subunit alpha                              | TAO_0149    | NHAL_0218    | NOC_0372 | NWAT_2731 | glycyl-tRNA synthetase subunit alpha                                               | * | * | * |
| 1469 | 2288 | -                                                                 | -           | NHAL_0217    | NOC_0371 | NWAT_2732 | <b>hypothetical protein</b>                                                        | * |   |   |
| 1470 | 2176 | -                                                                 | -           | NHAL_0216    | NOC_0370 | NWAT_2733 | <b>surface antigen (D15)</b>                                                       | * |   |   |
| 1471 | 405  | TonB family protein                                               | TAO_0146    | NHAL_0214    | NOC_0369 | NWAT_2734 | TonB family protein                                                                | * | * | * |

|      |      |                                                                           |                    |                        |          |           |                                                                    |   |   |   |
|------|------|---------------------------------------------------------------------------|--------------------|------------------------|----------|-----------|--------------------------------------------------------------------|---|---|---|
| 1472 | 1822 | -                                                                         | -                  | NHAL_0212              | NOC_0368 | NWAT_2735 | <b>hypothetical protein</b>                                        | * |   |   |
| 1473 | 389  | <b>holliday junction resolvase YqgF</b>                                   | <b>TAO_0145</b>    | NHAL_0211              | NOC_0367 | NWAT_2736 | holliday junction resolvase YqgF                                   | * | * | * |
| 1474 | 478  | <b>uracil phosphoribosyltransferase</b>                                   | <b>TAO_0144</b>    | NHAL_0210              | NOC_0366 | NWAT_2737 | uracil phosphoribosyltransferase                                   | * | * | * |
| 1475 | 974  | <b>aspartate carbamoyltransferase</b>                                     | <b>TAO_0143</b>    | NHAL_0209              | NOC_0365 | NWAT_2738 | aspartate carbamoyltransferase                                     | * | * | * |
| 1476 | 1180 | <b>dihydroorotase</b>                                                     | <b>TAO_0142</b>    | NHAL_0208              | NOC_0364 | NWAT_2739 | dihydroorotase                                                     | * | * | * |
| 1477 | 978  | <b>oxidoreductase FAD/NAD(P)-binding protein</b>                          | <b>TAO_0141</b>    | NHAL_0207              | NOC_0363 | NWAT_2740 | oxidoreductase FAD/NAD(P)-binding domain-containing protein        | * | * | * |
| 1478 | 731  | <b>molybdopterin biosynthesis protein MoeB</b>                            | <b>TAO_1666</b>    | NHAL_0256              | NOC_0362 | NWAT_2741 | UBA/THIF-type NAD/FAD-binding protein                              | * | * | * |
| 1479 | 356  | <b>Mov34/MPN/PAD-1 family protein</b>                                     | <b>TAO_1665</b>    | NHAL_0257              | NOC_0361 | NWAT_2742 | Mov34/MPN/PAD-1 family protein                                     | * | * | * |
| 1480 | 1903 | -                                                                         | -                  | NHAL_0259              | NOC_0360 | NWAT_2743 | <b>hypothetical protein</b>                                        | * |   |   |
| 1481 | 544  | <b>hypothetical conserved protein</b>                                     | <b>TAO_0184</b>    | NHAL_0260              | NOC_0359 | NWAT_2744 | hypothetical protein                                               | * | * | * |
| 1482 | 2205 | -                                                                         | -                  | NHAL_0265              | NOC_0358 | NWAT_2745 | <b>Cl- channel voltage-gated family protein</b>                    | * |   |   |
| 1483 | 794  | <b>ribosomal RNA small subunit methyltransferase I</b>                    | <b>TAO_0217</b>    | NHAL_0476              | NOC_0357 | NWAT_2746 | uroporphyrin-III C/tetrapyrrole methyltransferase                  | * | * | * |
| 1484 | 1226 | <b>LppC family lipoprotein</b>                                            | <b>TAO_0216</b>    | NHAL_0475              | NOC_0356 | NWAT_2747 | LppC family lipoprotein                                            | * | * | * |
| 1485 | 285  | <b>hypothetical conserved protein</b>                                     | <b>TAO_0215</b>    | NHAL_0474              | NOC_0355 | NWAT_2748 | hypothetical protein                                               | * | * | * |
| 1486 | 514  | <b>phosphoheptose isomerase</b>                                           | <b>TAO_0214</b>    | NHAL_0473              | NOC_0354 | NWAT_2749 | phosphoheptose isomerase                                           | * | * | * |
| 1487 | 1804 | -                                                                         | -                  | NHAL_0472              | NOC_0353 | NWAT_2750 | <b>periplasmic or secreted lipoprotein</b>                         | * |   |   |
| 1488 | 1246 | <b>FAD linked oxidase domain-containing protein</b>                       | <b>TAO_0213</b>    | NHAL_0471              | NOC_0352 | NWAT_2751 | FAD linked oxidase domain-containing protein                       | * | * | * |
| 1489 | 1635 | -                                                                         | -                  | NHAL_0470              | NOC_0351 | NWAT_2752 | <b>hypothetical protein</b>                                        | * |   |   |
| 1490 | 2831 | -                                                                         | -                  | -                      | NOC_0350 | NWAT_2753 | <b>metal-dependent phosphohydrolase</b>                            | * |   |   |
| 1491 | 2834 | -                                                                         | -                  | -                      | NOC_0349 | NWAT_2754 | <b>diguanylate cyclase/phosphodiesterase</b>                       | * |   |   |
| 1492 | 535  | <b>outer membrane lipoprotein carrier protein LolA</b>                    | <b>TAO_0207</b>    | NHAL_3419              | NOC_0348 | NWAT_2755 | outer membrane lipoprotein carrier protein LolA                    | * | * | * |
| 1493 | 1387 | <b>cell division FtsK/spoIIIE</b>                                         | <b>TAO_0206</b>    | NHAL_3420              | NOC_0347 | NWAT_2756 | cell division FtsK/spoIIIE                                         | * | * | * |
| 1494 | 2029 | -                                                                         | -                  | NHAL_3421              | NOC_0346 | NWAT_2757 | <b>alanine dehydrogenase</b>                                       | * |   |   |
| 1495 | 990  | <b>thioredoxin reductase</b>                                              | <b>TAO_0205</b>    | NHAL_3422              | NOC_0345 | NWAT_2758 | thioredoxin reductase                                              | * | * | * |
| 1496 | 258  | <b>DNA adenine methylase</b>                                              | <b>TAO_0847</b>    | NHAL_3423              | NOC_0344 | NWAT_2759 | DNA adenine methylase                                              | * | * | * |
| 1497 | 1200 | <b>Ste24 endopeptidase</b>                                                | <b>TAO_0203</b>    | NHAL_3425              | NOC_0342 | NWAT_2763 | Ste24 endopeptidase                                                | * | * | * |
| 1498 | 551  | <b>oligoribonuclease</b>                                                  | <b>TAO_0202</b>    | NHAL_3426              | NOC_0341 | NWAT_2764 | exonuclease RNase T and DNA polymerase III                         | * | * | * |
| 1499 | 2072 | -                                                                         | -                  | NHAL_3427              | NOC_0340 | NWAT_2765 | <b>iron-sulfur cluster binding protein</b>                         | * |   |   |
| 1500 | 1278 | <b>carbohydrate kinase</b>                                                | <b>TAO_0201</b>    | NHAL_3428              | NOC_0339 | NWAT_2766 | carbohydrate kinase                                                | * | * | * |
| 1501 | 336  | <b>ATPase YjeE</b>                                                        | <b>TAO_0200</b>    | NHAL_3429              | NOC_0338 | NWAT_2767 | ATPase YjeE                                                        | * | * | * |
| 1502 | 1016 | <b>N-acetylmuramoyl-L-alanine amidase</b>                                 | <b>TAO_0199</b>    | NHAL_3430              | NOC_0337 | NWAT_2768 | N-acetylmuramoyl-L-alanine amidase                                 | * | * | * |
| 1503 | 1220 | <b>DNA mismatch repair protein MutL</b>                                   | <b>TAO_1705</b>    | NHAL_3431              | NOC_0336 | NWAT_2769 | DNA mismatch repair protein MutL                                   | * | * | * |
| 1504 | 120  | <b>PAS/PAC sensor(s)-containing diguanylate cyclase/phosphodiesterase</b> | <b>TAO_1717</b>    | NHAL_3432<br>NHAL_3433 | NOC_0335 | NWAT_2770 | PAS/PAC sensor(s)-containing diguanylate cyclase/phosphodiesterase | * | * |   |
| 1505 | 766  | <b>lysR family transcriptional regulator</b>                              | <b>TAO_1719</b>    | NHAL_3434              | NOC_0334 | NWAT_2771 | LysR family transcriptional regulator                              | * | * | * |
| 1506 | 546  | <b>hypothetical conserved protein</b>                                     | <b>TAO_1721</b>    | NHAL_3842              | NOC_0317 | NWAT_0411 | hypothetical protein                                               | * | * | * |
| 1507 | 848  | <b>diaminopimelate epimerase</b>                                          | <b>TAO_1722</b>    | NHAL_3843              | NOC_0316 | NWAT_0410 | diaminopimelate epimerase                                          | * | * | * |
| 1508 | 1867 | -                                                                         | -                  | NHAL_3844              | NOC_0315 | NWAT_0409 | <b>methyltransferase type 11</b>                                   | * |   |   |
| 1509 | 1201 | <b>diaminopimelate decarboxylase</b>                                      | <b>TAO_1723</b>    | NHAL_3845              | NOC_0314 | NWAT_0408 | diaminopimelate decarboxylase                                      | * | * | * |
| 1510 | 1324 | <b>type II secretion system protein E</b>                                 | <b>TAO_1724</b>    | NHAL_3847              | NOC_0312 | NWAT_0407 | type IV-A pilus assembly ATPase pilB                               | * | * | * |
| 1511 | 1174 | <b>type II secretion system protein F</b>                                 | <b>TAO_1725</b>    | NHAL_3848              | NOC_0311 | NWAT_0406 | type II secretion system protein F                                 | * | * | * |
| 1512 | 946  | <b>leader peptidase (prepilin peptidase) / N-methyltransferase</b>        | <b>TAO_1726</b>    | NHAL_3849              | NOC_0310 | NWAT_0405 | prepilin peptidase                                                 | * | * | * |
| 1513 | 458  | <b>dephospho-coA kinase</b>                                               | <b>TAO_1727(1)</b> | NHAL_3850              | NOC_0309 | NWAT_0404 | dephospho-coA kinase                                               | * | * | * |
| 1514 | 154  | <b>dephospho-coA kinase</b>                                               | <b>TAO_1727(2)</b> | NHAL_3852              | NOC_0308 | NWAT_0403 | dephospho-coA kinase                                               | * | * | * |
| 1515 | 837  | <b>mutator MutT protein</b>                                               | <b>TAO_1728</b>    | NHAL_3853              | NOC_0306 | NWAT_0402 | mutator MutT protein                                               | * | * | * |
| 1516 | 195  | <b>hypothetical conserved protein</b>                                     | <b>TAO_1729</b>    | NHAL_3854              | NOC_0305 | NWAT_0401 | hypothetical protein                                               | * | * | * |
| 1517 | 174  | <b>hypothetical conserved protein</b>                                     | <b>TAO_1737</b>    | NHAL_3855              | NOC_0304 | NWAT_0400 | zinc finger protein                                                | * | * | * |
| 1518 | 1128 | <b>quinolinate synthetase</b>                                             | <b>TAO_1738</b>    | NHAL_3856              | NOC_0303 | NWAT_0399 | quinolinate synthetase complex subunit                             | * | * | * |
| 1519 | 1369 | <b>aspartyl-tRNA synthetase</b>                                           | <b>TAO_1740</b>    | NHAL_3857              | NOC_0302 | NWAT_0398 | aspartyl-tRNA synthetase                                           | * | * | * |
| 1520 | 216  | <b>FmdB family transcriptional regulator</b>                              | <b>TAO_1741</b>    | NHAL_3858              | NOC_0301 | NWAT_0397 | FmdB family transcriptional regulator                              | * | * | * |

|      |      |                                                       |          |           |           |           |                                                       |   |   |   |
|------|------|-------------------------------------------------------|----------|-----------|-----------|-----------|-------------------------------------------------------|---|---|---|
| 1521 | 581  | ubiquinol-cytochrome C reductase, iron-sulfur subunit | TAO_1745 | NHAL_3860 | NOC_0299  | NWAT_0395 | ubiquinol-cytochrome c reductase, iron-sulfur subunit | * | * | * |
| 1522 | 1264 | cytochrome b/b6 domain-containing protein             | TAO_1746 | NHAL_3861 | NOC_0298  | NWAT_0394 | cytochrome b/b6 domain-containing protein             | * | * | * |
| 1523 | 724  | cytochrome c1                                         | TAO_1747 | NHAL_3862 | NOC_0297  | NWAT_0393 | cytochrome c1                                         | * | * | * |
| 1524 | 566  | glutathione S-transferase                             | TAO_1748 | NHAL_3863 | NOC_0296  | NWAT_0392 | glutathione S-transferase protein                     | * | * | * |
| 1525 | 317  | stringent starvation protein B                        | TAO_1749 | NHAL_3864 | NOC_0295  | NWAT_0391 | stringent starvation protein B                        | * | * | * |
| 1526 | 1252 | NAD(P)(+) transhydrogenase                            | TAO_1752 | NHAL_3871 | NOC_0261  | NWAT_0362 | NAD(P)(+) transhydrogenase                            | * | * | * |
| 1527 | 753  | hypothetical conserved protein                        | TAO_1753 | NHAL_3875 | NOC_0260  | NWAT_0361 | hypothetical protein                                  | * | * | * |
| 1528 | 827  | rimK family alpha-L-glutamate ligase                  | TAO_1754 | NHAL_3877 | NOC_0259  | NWAT_0360 | RimK family alpha-L-glutamate ligase                  | * | * | * |
| 1529 | 561  | histidine biosynthesis protein                        | TAO_1756 | NHAL_3880 | NOC_0258  | NWAT_0356 | histidine biosynthesis protein                        | * | * | * |
| 1530 | 764  | hypothetical conserved protein                        | TAO_1759 | NHAL_3881 | NOC_0257  | NWAT_0355 | hypothetical protein                                  | * | * | * |
| 1531 | 942  | H4MPT-linked C1 transfer pathway protein              | TAO_1760 | NHAL_3882 | NOC_0256  | NWAT_0354 | H4MPT-linked C1 transfer pathway protein              | * | * | * |
| 1532 | 1217 | para-aminobenzoate synthase subunit I                 | TAO_1761 | NHAL_3883 | NOC_0255  | NWAT_0353 | para-aminobenzoate synthase subunit I                 | * | * | * |
| 1533 | 461  | aspartate/glutamate/uridylyate kinase                 | TAO_1762 | NHAL_3884 | NOC_0254  | NWAT_0352 | aspartate/glutamate/uridylyate kinase                 | * | * | * |
| 1534 | 1058 | 3-dehydroquinate synthase                             | TAO_1764 | NHAL_3885 | NOC_0253  | NWAT_0351 | 3-dehydroquinate synthase                             | * | * | * |
| 1535 | 460  | shikimate kinase                                      | TAO_1765 | NHAL_3886 | NOC_0252  | NWAT_0350 | shikimate kinase                                      | * | * | * |
| 1536 | 1301 | type IV pilus secretin pilQ subfamily                 | TAO_1766 | NHAL_3887 | NOC_0251  | NWAT_0349 | type IV pilus secretin pilQ                           | * | * | * |
| 1537 | 370  | pilus assembly protein pilP                           | TAO_1767 | NHAL_3888 | NOC_0250  | NWAT_0348 | pilus assembly protein pilP                           | * | * | * |
| 1538 | 507  | pilus assembly protein pilO                           | TAO_1768 | NHAL_3889 | NOC_0249  | NWAT_0347 | pilus assembly protein, pilO                          | * | * | * |
| 1539 | 421  | pilus biogenesis protein pilN                         | TAO_1769 | NHAL_3890 | NOC_0248  | NWAT_0346 | type 4 fimbrial biogenesis protein pilN               | * | * | * |
| 1540 | 873  | type IV pilus assembly protein pilM                   | TAO_1770 | NHAL_3891 | NOC_0247  | NWAT_0345 | type IV pilus assembly protein pilM                   | * | * | * |
| 1541 | 1419 | penicillin-binding protein, 1A family                 | TAO_1771 | NHAL_3892 | NOC_0246  | NWAT_0344 | penicillin-binding protein, 1A family                 | * | * | * |
| 1542 | 500  | hypothetical conserved protein                        | TAO_1772 | NHAL_3893 | NOC_0245  | NWAT_0343 | hypothetical protein                                  | * | * | * |
| 1543 | 2076 | -                                                     | -        | NHAL_3894 | NOC_0244  | NWAT_0342 | malate dehydrogenase                                  | * | * | * |
| 1544 | 187  | 50S ribosomal protein L31                             | TAO_1773 | NHAL_3895 | NOC_0243  | NWAT_0341 | 50S ribosomal protein L31                             | * | * | * |
| 1545 | 1281 | potassium uptake protein, TrkH family                 | TAO_1774 | NHAL_3896 | NOC_0242  | NWAT_0340 | potassium uptake protein, TrkH family                 | * | * | * |
| 1546 | 1292 | apolipoprotein N-acyltransferase                      | TAO_1775 | NHAL_3897 | NOC_0241  | NWAT_0339 | apolipoprotein N-acyltransferase                      | * | * | * |
| 1547 | 811  | Mg2+/co2+ transporter-like protein                    | TAO_1776 | NHAL_3898 | NOC_0240  | NWAT_0338 | Mg2+/co2+ transporter-like protein                    | * | * | * |
| 1548 | 354  | hypothetical conserved protein                        | TAO_1777 | NHAL_3899 | NOC_0239  | NWAT_0337 | hypothetical protein                                  | * | * | * |
| 1549 | 928  | phosphate starvation-inducible protein phoH           | TAO_1778 | NHAL_3900 | NOC_0238  | NWAT_0336 | phoH family protein                                   | * | * | * |
| 1550 | 1262 | (dimethylallyl)adenosine tRNA methyltransferase       | TAO_1779 | NHAL_3901 | NOC_0237  | NWAT_0335 | tRNA-i(6)A37 thiotransferase MiaB                     | * | * | * |
| 1551 | 694  | DNA repair protein radC                               | TAO_1780 | NHAL_3902 | NOC_0236  | NWAT_0334 | DNA repair protein radC                               | * | * | * |
| 1552 | 406  | dihydrofolate reductase                               | TAO_1781 | NHAL_3903 | NOC_0235  | NWAT_0333 | dihydrofolate reductase                               | * | * | * |
| 1553 | 905  | thymidylate synthase                                  | TAO_1782 | NHAL_3904 | NOC_0234  | NWAT_0332 | thymidylate synthase                                  | * | * | * |
| 1554 | 927  | prolipoprotein diacylglyceryl transferase             | TAO_1783 | NHAL_3905 | NOC_0233  | NWAT_0331 | prolipoprotein diacylglyceryl transferase             | * | * | * |
| 1555 | 2066 | -                                                     | -        | NHAL_3906 | NOC_0232  | NWAT_0330 | hypothetical protein                                  | * | * | * |
| 1556 | 640  | hypothetical conserved protein                        | TAO_1786 | NHAL_3909 | NOC_0231  | NWAT_0329 | hypothetical protein                                  | * | * | * |
| 1557 | 2106 | -                                                     | -        | NHAL_3967 | NOC_A0032 | NWAT_3168 | membrane-bound metal-dependent hydrolase              | * | * | * |
| 1558 | 1632 | -                                                     | -        | NHAL_0320 | NOC_A0033 | NWAT_3167 | MazE/toxin transcriptional modulator MazF             | * | * | * |
| 1559 | 1562 | -                                                     | -        | NHAL_0321 | NOC_A0034 | NWAT_3166 | hypothetical protein                                  | * | * | * |
| 1560 | 1927 | -                                                     | -        | NHAL_3970 | NOC_A0035 | NWAT_3165 | hypothetical protein                                  | * | * | * |
| 1561 | 1911 | -                                                     | -        | NHAL_3971 | NOC_A0036 | NWAT_3164 | hypothetical protein                                  | * | * | * |
| 1562 | 1600 | -                                                     | -        | NHAL_3972 | NOC_A0037 | NWAT_3163 | hypothetical protein                                  | * | * | * |
| 1563 | 2706 | -                                                     | -        | NHAL_3975 | NOC_A0039 |           | hypothetical protein                                  | * | * | * |
| 1564 | 2458 | -                                                     | -        | NHAL_3976 | NOC_A0040 |           | hypothetical protein                                  | * | * | * |
| 1565 | 165  | -                                                     | -        | NHAL_3977 | NOC_A0041 | NWAT_3153 | XRE family transcriptional regulator                  | * | * | * |
| 1566 | 1746 | -                                                     | -        | NHAL_3987 | NOC_A0042 | NWAT_3152 | Gp157 family protein                                  | * | * | * |
| 1567 | 1942 | -                                                     | -        | NHAL_3989 | NOC_A0001 | NWAT_3150 | hypothetical protein                                  | * | * | * |
| 1568 | 1731 | -                                                     | -        | NHAL_3990 | NOC_A0002 | NWAT_3149 | hypothetical protein                                  | * | * | * |
| 1569 | 1683 | -                                                     | -        | NHAL_3992 | NOC_A0003 | NWAT_3147 | HicB family protein                                   | * | * | * |
| 1570 | 2658 | -                                                     | -        | NHAL_3994 | NOC_A0005 |           | hypothetical protein                                  | * | * | * |



|      |      |                                                                         |          |           |           |           |                                                                         |   |   |   |
|------|------|-------------------------------------------------------------------------|----------|-----------|-----------|-----------|-------------------------------------------------------------------------|---|---|---|
| 1571 | 1539 | -                                                                       | -        | NHAL_3996 | NOC_A0006 | NWAT_3187 | hypothetical protein                                                    | * |   |   |
| 1572 | 2079 | -                                                                       | -        | NHAL_3999 | NOC_A0008 | NWAT_3185 | endonuclease/exonuclease/phosphatase                                    | * |   |   |
| 1573 | 1715 | -                                                                       | -        | NHAL_4000 | NOC_A0009 | NWAT_3184 | hypothetical protein                                                    | * |   |   |
| 1574 | 1971 | -                                                                       | -        | NHAL_4001 | NOC_A0010 | NWAT_3183 | restriction endonuclease                                                | * |   |   |
| 1575 | 2694 | -                                                                       | -        | -         | NOC_A0012 | NWAT_3181 | hypothetical protein                                                    | * |   |   |
| 1576 | 1940 | -                                                                       | -        | NHAL_4004 | NOC_A0013 | NWAT_3180 | cobyrinic acid ac-diamide synthase                                      | * |   |   |
| 1577 | 1930 | -                                                                       | -        | NHAL_4005 | NOC_A0014 | NWAT_3179 | ParB-like partition protein                                             | * |   |   |
| 1578 | 1079 | -                                                                       | -        | NHAL_4007 | NOC_A0015 | NWAT_3178 | integrase family protein                                                | * |   |   |
| 1579 | 1638 | -                                                                       | -        | NHAL_4008 | NOC_A0016 | NWAT_3177 | hypothetical protein                                                    | * |   |   |
| 1580 | 1978 | -                                                                       | -        | NHAL_3942 | NOC_3070  | NWAT_3125 | PfkB domain-containing protein                                          | * |   |   |
| 1581 | 2260 | -                                                                       | -        | NHAL_3941 | NOC_3069  | NWAT_3124 | sucrose-phosphate synthase                                              | * |   |   |
| 1582 | 2272 | -                                                                       | -        | NHAL_3940 | NOC_3068  | NWAT_3123 | sucrose synthase                                                        | * |   |   |
| 1583 | 744  | transfer origin protein, TraL                                           | TAO_1022 | NHAL_0248 | NOC_3067  | NWAT_3120 | transfer origin protein TraL                                            | * | * | * |
| 1584 | 178  | hypothetical conserved protein                                          | TAO_1021 | NHAL_0249 | NOC_3066  | NWAT_3119 | hypothetical protein                                                    | * | * | * |
| 1585 | 1268 | amino acid permease-associated protein                                  | TAO_0031 | NHAL_0043 | NOC_3063  | NWAT_3116 | amino acid permease-associated protein                                  | * | * | * |
| 1586 | 1571 | -                                                                       | -        | NHAL_0045 | NOC_3062  | NWAT_3115 | hypothetical protein                                                    | * |   |   |
| 1587 | 1671 | -                                                                       | -        | NHAL_0046 | NOC_3061  | NWAT_3114 | pentapeptide repeat-containing protein                                  | * |   |   |
| 1588 | 1019 | inositol phosphatase/fructose-16-bisphosphatase                         | TAO_0005 | NHAL_0011 | NOC_0021  | NWAT_0019 | inositol phosphatase/fructose-16-bisphosphatase                         | * | * | * |
| 1589 | 736  | formylmethanofuran dehydrogenase subunit C                              | TAO_0007 | NHAL_0012 | NOC_0022  | NWAT_0020 | formylmethanofuran dehydrogenase subunit C                              | * | * | * |
| 1590 | 855  | formylmethanofuran--tetrahydropterin formyltransferase                  | TAO_0008 | NHAL_0013 | NOC_0023  | NWAT_0021 | formylmethanofuran--tetrahydropterin formyltransferase                  | * | * | * |
| 1591 | 1341 | formylmethanofuran dehydrogenase subunit A                              | TAO_0009 | NHAL_0014 | NOC_0024  | NWAT_0022 | formylmethanofuran dehydrogenase subunit A                              | * | * | * |
| 1592 | 1116 | formylmethanofuran dehydrogenase subunit B                              | TAO_0010 | NHAL_0015 | NOC_0025  | NWAT_0023 | formylmethanofuran dehydrogenase subunit B                              | * | * | * |
| 1593 | 212  | sporulation domain-containing protein                                   | TAO_0011 | NHAL_0017 | NOC_0026  | NWAT_0024 | sporulation domain-containing protein                                   | * | * | * |
| 1594 | 1342 | arginyl-tRNA synthetase                                                 | TAO_0012 | NHAL_0018 | NOC_0027  | NWAT_0025 | arginyl-tRNA synthetase                                                 | * | * | * |
| 1595 | 1395 | primosome assembly protein priA                                         | TAO_0013 | NHAL_0019 | NOC_0028  | NWAT_0026 | primosome assembly protein priA                                         | * | * | * |
| 1596 | 499  | DJ-1 family protein                                                     | TAO_0014 | NHAL_0020 | NOC_0029  | NWAT_0027 | DJ-1 family protein                                                     | * | * | * |
| 1597 | 1159 | carboxyl-terminal protease                                              | TAO_0016 | NHAL_0021 | NOC_0030  | NWAT_0028 | carboxyl-terminal protease                                              | * | * | * |
| 1598 | 2194 | -                                                                       | -        | NHAL_0023 | NOC_0031  | NWAT_0029 | phosphoglycerate mutase                                                 | * |   |   |
| 1599 | 385  | rhodanese-like protein                                                  | TAO_0017 | NHAL_0024 | NOC_0032  | NWAT_0030 | rhodanese-like protein                                                  | * | * | * |
| 1600 | 203  | glutaredoxin GrxC                                                       | TAO_0018 | NHAL_0025 | NOC_0033  | NWAT_0031 | glutaredoxin GrxC                                                       | * | * | * |
| 1601 | 403  | preprotein translocase subunit SecB                                     | TAO_0019 | NHAL_0026 | NOC_0034  | NWAT_0032 | preprotein translocase subunit SecB                                     | * | * | * |
| 1602 | 940  | NAD(P)H-dependent glycerol-3-phosphate dehydrogenase                    | TAO_0020 | NHAL_0027 | NOC_0035  | NWAT_0033 | NAD(P)H-dependent glycerol-3-phosphate dehydrogenase                    | * | * | * |
| 1603 | 680  | hypothetical conserved protein                                          | TAO_0021 | NHAL_0028 | NOC_0036  | NWAT_0034 | hypothetical protein                                                    | * | * | * |
| 1604 | 1120 | hypothetical conserved protein                                          | TAO_0022 | NHAL_0029 | NOC_0037  | NWAT_0035 | hypothetical protein                                                    | * | * | * |
| 1605 | 432  | 2-amino-4-hydroxy-6-hydroxymethylidihydropteridine pyrophosphokinase    | TAO_0023 | NHAL_0030 | NOC_0038  | NWAT_0036 | 2-amino-4-hydroxy-6-hydroxymethylidihydropteridine pyrophosphokinase    | * | * | * |
| 1606 | 324  | dihydroneopterin aldolase                                               | TAO_0024 | NHAL_0031 | NOC_0039  | NWAT_0037 | dihydroneopterin aldolase                                               | * | * | * |
| 1607 | 513  | glycerol-3-phosphate acyltransferase                                    | TAO_0025 | NHAL_0032 | NOC_0040  | NWAT_0038 | glycerol-3-phosphate acyltransferase                                    | * | * | * |
| 1608 | 996  | UGMP family protein                                                     | TAO_0026 | NHAL_0033 | NOC_0041  | NWAT_0039 | metalloendopeptidase, glycoprotease family                              | * | * | * |
| 1609 | 191  | 30S ribosomal protein S21                                               | TAO_0027 | NHAL_0034 | NOC_0042  | NWAT_0040 | 30S ribosomal protein S21                                               | * | * | * |
| 1610 | 365  | Yqey domain containing protein                                          | TAO_0028 | NHAL_0035 | NOC_0043  | NWAT_0041 | Yqey domain containing protein                                          | * | * | * |
| 1611 | 1291 | DNA primase                                                             | TAO_0029 | NHAL_0036 | NOC_0044  | NWAT_0042 | DNA primase                                                             | * | * | * |
| 1612 | 197  | twin-arginine translocation protein TatB                                | TAO_0034 | NHAL_0048 | NOC_3059  | NWAT_3112 | twin-arginine translocation protein TatB                                | * | * | * |
| 1613 | 160  | twin-arginine translocation protein, TatA/E family subunit              | TAO_0035 | NHAL_0049 | NOC_3058  | NWAT_3111 | twin-arginine translocation protein, TatA/E family subunit              | * | * | * |
| 1614 | 311  | histidine triad (HIT) protein                                           | TAO_0036 | NHAL_0050 | NOC_3057  | NWAT_3110 | histidine triad protein                                                 | * | * | * |
| 1615 | 280  | phosphoribosyl-ATP diphosphatase                                        | TAO_0037 | NHAL_0051 | NOC_3056  | NWAT_3109 | phosphoribosyl-ATP diphosphatase                                        | * | * | * |
| 1616 | 363  | phosphoribosyl-AMp cyclohydrolase                                       | TAO_0038 | NHAL_0052 | NOC_3055  | NWAT_3108 | phosphoribosyl-AMp cyclohydrolase                                       | * | * | * |
| 1617 | 792  | imidazole glycerol phosphate synthase subunit hisF                      | TAO_0039 | NHAL_0053 | NOC_3054  | NWAT_3107 | imidazole glycerol phosphate synthase subunit hisF                      | * | * | * |
| 1618 | 787  | phosphoribosylformimino-5-aminoimidazole carboxamide ribotide isomerase | TAO_0040 | NHAL_0054 | NOC_3053  | NWAT_3106 | phosphoribosylformimino-5-aminoimidazole carboxamide ribotide isomerase | * | * | * |

|      |      |                                                                          |          |           |          |           |                                                                            |   |   |   |
|------|------|--------------------------------------------------------------------------|----------|-----------|----------|-----------|----------------------------------------------------------------------------|---|---|---|
| 1619 | 633  | imidazole glycerol phosphate synthase glutamine amidotransferase subunit | TAO_0041 | NHAL_0055 | NOC_3052 | NWAT_3105 | imidazole glycerol phosphate synthase, glutamine amidotransferase subunit  | * | * | * |
| 1620 | 579  | imidazoleglycerol-phosphate dehydratase                                  | TAO_0042 | NHAL_0056 | NOC_3051 | NWAT_3104 | imidazoleglycerol-phosphate dehydratase                                    | * | * | * |
| 1621 | 2392 | -                                                                        | -        | NHAL_0057 | -        | NWAT_3103 | <b>hypothetical protein</b>                                                | * |   |   |
| 1622 | 232  | cytochrome c class I                                                     | TAO_0043 | NHAL_0058 | NOC_3050 | NWAT_3102 | cytochrome c, class I                                                      | * | * | * |
| 1623 | 281  | cytochrome c class I                                                     | TAO_0044 | NHAL_0059 | NOC_3049 | NWAT_3101 | cytochrome c, class I                                                      | * | * | * |
| 1624 | 319  | hypothetical conserved protein                                           | TAO_0045 | NHAL_0060 | NOC_3048 | NWAT_3100 | hypothetical protein                                                       | * | * | * |
| 1625 | 843  | cytochrome c oxidase subunit II                                          | TAO_0046 | NHAL_0061 | NOC_3047 | NWAT_3099 | cytochrome c oxidase, subunit II                                           | * | * | * |
| 1626 | 1356 | cytochrome c oxidase subunit I                                           | TAO_0047 | NHAL_0062 | NOC_3046 | NWAT_3098 | cytochrome c oxidase subunit I                                             | * | * | * |
| 1627 | 412  | cytochrome c oxidase assembly protein CtaG/cox11                         | TAO_0048 | NHAL_0063 | NOC_3045 | NWAT_3096 | cytochrome C oxidase assembly protein CtaG/cox11                           | * | * | * |
| 1628 | 984  | cytochrome c oxidase                                                     | TAO_0049 | NHAL_0064 | NOC_3044 | NWAT_3095 | cytochrome c oxidase                                                       | * | * | * |
| 1629 | 145  | hypothetical conserved protein                                           | TAO_0050 | NHAL_0065 | NOC_3043 | NWAT_3094 | hypothetical protein                                                       | * | * | * |
| 1630 | 464  | hypothetical conserved protein                                           | TAO_0051 | NHAL_0066 | NOC_3042 | NWAT_3093 | hypothetical protein                                                       | * | * | * |
| 1631 | 453  | hypothetical conserved protein                                           | TAO_0052 | NHAL_0067 | NOC_3041 | NWAT_3092 | hypothetical protein                                                       | * | * | * |
| 1632 | 1030 | cytochrome oxidase assembly                                              | TAO_0053 | NHAL_0068 | NOC_3040 | NWAT_3091 | cytochrome oxidase assembly                                                | * | * | * |
| 1633 | 1008 | protoheme IX farnesyltransferase                                         | TAO_0054 | NHAL_0069 | NOC_3039 | NWAT_3090 | protoheme IX farnesyltransferase                                           | * | * | * |
| 1634 | 1297 | integral membrane protein MviN                                           | TAO_0055 | NHAL_0070 | NOC_3038 | NWAT_3089 | integral membrane protein MviN                                             | * | * | * |
| 1635 | 180  | 30S ribosomal protein S20                                                | TAO_0056 | NHAL_0071 | NOC_3037 | NWAT_3088 | 30S ribosomal protein S20                                                  | * | * | * |
| 1636 | 1018 | glutamate 5-kinase                                                       | TAO_0057 | NHAL_0072 | NOC_3036 | NWAT_3087 | glutamate 5-kinase                                                         | * | * | * |
| 1637 | 995  | GTP-binding protein Obg/CgtA                                             | TAO_0058 | NHAL_0073 | NOC_3035 | NWAT_3086 | GTP-binding protein Obg/CgtA                                               | * | * | * |
| 1638 | 220  | 50S ribosomal protein L27                                                | TAO_0059 | NHAL_0074 | NOC_3034 | NWAT_3085 | 50S ribosomal protein L27                                                  | * | * | * |
| 1639 | 289  | 50S ribosomal protein L21                                                | TAO_0060 | NHAL_0075 | NOC_3033 | NWAT_3084 | 50S ribosomal protein L21                                                  | * | * | * |
| 1640 | 929  | octaprenyl diphosphate synthase                                          | TAO_0061 | NHAL_0076 | NOC_3032 | NWAT_3083 | trans-hexaprenyltransferase                                                | * | * | * |
| 1641 | 443  | single-stranded DNA-binding protein                                      | TAO_1654 | NHAL_3825 | NOC_3023 | NWAT_3081 | single-strand binding protein                                              | * | * | * |
| 1642 | 1276 | major facilitator superfamily protein                                    | TAO_1653 | NHAL_3824 | NOC_3022 | NWAT_3080 | major facilitator superfamily protein                                      | * | * | * |
| 1643 | 1438 | excinuclease ABC subunit A                                               | TAO_1652 | NHAL_3823 | NOC_3021 | NWAT_3078 | excinuclease ABC subunit A                                                 | * | * | * |
| 1644 | 1229 | potassium transporter peripheral membrane protein                        | TAO_1649 | NHAL_3822 | NOC_3020 | NWAT_3077 | potassium transporter peripheral membrane protein                          | * | * | * |
| 1645 | 2098 | -                                                                        | -        | NHAL_3821 | NOC_3019 | NWAT_3076 | <b>Fis family two component sigma54 specific transcriptional regulator</b> | * |   |   |
| 1646 | 2252 | -                                                                        | -        | NHAL_3820 | NOC_3018 | NWAT_3075 | <b>integral membrane sensor signal transduction histidine kinase</b>       | * |   |   |
| 1647 | 1824 | -                                                                        | -        | NHAL_3819 | NOC_3017 | NWAT_3074 | <b>hypothetical protein</b>                                                | * |   |   |
| 1648 | 1182 | rRNA SAM-dependent methyltransferase                                     | TAO_1648 | NHAL_3818 | NOC_3016 | NWAT_3073 | RRNA SAM-dependent methyltransferase                                       | * | * | * |
| 1649 | 854  | methionyl-tRNA formyltransferase                                         | TAO_1647 | NHAL_3817 | NOC_3015 | NWAT_3072 | methionyl-tRNA formyltransferase                                           | * | * | * |
| 1650 | 482  | peptide deformylase                                                      | TAO_1646 | NHAL_3816 | NOC_3014 | NWAT_3071 | peptide deformylase                                                        | * | * | * |
| 1651 | 611  | peptidoglycan-binding LysM protein                                       | TAO_1645 | NHAL_3815 | NOC_3013 | NWAT_3070 | peptidoglycan-binding LysM protein                                         | * | * | * |
| 1652 | 1055 | DNA protecting protein DprA                                              | TAO_1644 | NHAL_3814 | NOC_3012 | NWAT_3069 | DNA protecting protein DprA                                                | * | * | * |
| 1653 | 515  | hypothetical conserved protein                                           | TAO_1643 | NHAL_3813 | NOC_3011 | NWAT_3068 | hypothetical protein                                                       | * | * | * |
| 1654 | 1423 | DNA topoisomerase I                                                      | TAO_1642 | NHAL_3812 | NOC_3010 | NWAT_3067 | DNA topoisomerase I                                                        | * | * | * |
| 1655 | 448  | phosphoribosylaminoimidazole carboxylase, catalytic subunit              | TAO_1641 | NHAL_3811 | NOC_3009 | NWAT_3066 | phosphoribosylaminoimidazole carboxylase catalytic subunit                 | * | * | * |
| 1656 | 1118 | uroporphyrinogen decarboxylase                                           | TAO_1639 | NHAL_3810 | NOC_3008 | NWAT_3065 | uroporphyrinogen decarboxylase                                             | * | * | * |
| 1657 | 1710 | -                                                                        | -        | NHAL_3788 | NOC_3007 | NWAT_3064 | <b>hypothetical protein</b>                                                | * |   |   |
| 1658 | 467  | hypothetical conserved protein                                           | TAO_0080 | NHAL_3789 | NOC_3006 | NWAT_3063 | hypothetical protein                                                       | * | * | * |
| 1659 | 1043 | twitching motility protein pilT                                          | TAO_0077 | NHAL_3792 | NOC_3004 | NWAT_3060 | twitching motility protein pilT                                            | * | * | * |
| 1660 | 642  | alanine racemase domain-containing protein                               | TAO_0076 | NHAL_3793 | NOC_3003 | NWAT_3059 | alanine racemase domain-containing protein                                 | * | * | * |
| 1661 | 708  | pyrroline-5-carboxylate reductase                                        | TAO_0075 | NHAL_3794 | NOC_3002 | NWAT_3058 | pyrroline-5-carboxylate reductase                                          | * | * | * |
| 1662 | 485  | hypothetical conserved protein                                           | TAO_0074 | NHAL_3795 | NOC_3001 | NWAT_3057 | hypothetical protein                                                       | * | * | * |
| 1663 | 205  | hypothetical conserved protein                                           | TAO_0073 | NHAL_3796 | NOC_3000 | NWAT_3056 | hypothetical protein                                                       | * | * | * |
| 1664 | 1144 | major facilitator family transporter                                     | TAO_0072 | NHAL_3797 | NOC_2999 | NWAT_3055 | major facilitator superfamily protein                                      | * | * | * |
| 1665 | 582  | orotate phosphoribosyltransferase                                        | TAO_0069 | NHAL_3798 | NOC_2998 | NWAT_3054 | orotate phosphoribosyltransferase                                          | * | * | * |
| 1666 | 838  | sulfite exporter TauE/SafE-like protein                                  | TAO_0068 | NHAL_3799 | NOC_2997 | NWAT_3053 | sulfite exporter TauE/SafE-like protein                                    | * | * | * |
| 1667 | 1802 | -                                                                        | -        | NHAL_3800 | NOC_2996 | NWAT_3052 | <b>hypothetical protein</b>                                                | * |   |   |

|      |      |                                                                               |          |           |          |           |                                                                               |   |   |   |
|------|------|-------------------------------------------------------------------------------|----------|-----------|----------|-----------|-------------------------------------------------------------------------------|---|---|---|
| 1668 | 882  | acetylglutamate kinase                                                        | TAO_0067 | NHAL_3801 | NOC_2995 | NWAT_3051 | acetylglutamate kinase                                                        | * | * | * |
| 1669 | 1259 | phosphomannomutase                                                            | TAO_0066 | NHAL_3802 | NOC_2994 | NWAT_3050 | phosphomannomutase                                                            | * | * | * |
| 1670 | 436  | deoxyuridine 5'-triphosphate nucleotidohydrolase Dut                          | TAO_0065 | NHAL_3803 | NOC_2993 | NWAT_3049 | deoxyuridine 5'-triphosphate nucleotidohydrolase Dut                          | * | * | * |
| 1671 | 1048 | phosphopantothenoylcysteine decarboxylase/phosphopantothenate/cysteine ligase | TAO_0064 | NHAL_3804 | NOC_2992 | NWAT_3048 | phosphopantothenoylcysteine decarboxylase/phosphopantothenate/cysteine ligase | * | * | * |
| 1672 | 442  | hypothetical conserved protein                                                | TAO_0063 | NHAL_3807 | NOC_2991 | NWAT_3047 | hypothetical protein                                                          | * | * | * |
| 1673 | 1938 | -                                                                             | -        | NHAL_3805 | NOC_2989 | NWAT_3044 | heat shock protein DnaJ domain-containing protein                             | * | * | * |
| 1674 | 1192 | lytic transglycosylase                                                        | TAO_0197 | NHAL_0363 | NOC_2988 | NWAT_3043 | lytic transglycosylase                                                        | * | * | * |
| 1675 | 454  | -                                                                             | -        | NHAL_0364 | NOC_2987 | NWAT_3042 | polyketide cyclase/dehydrase                                                  | * | * | * |
| 1676 | 1756 | -                                                                             | -        | NHAL_0365 | NOC_2986 | NWAT_3041 | putative PAS/PAC sensor protein                                               | * | * | * |
| 1677 | 1855 | -                                                                             | -        | NHAL_0366 | NOC_2985 | NWAT_3040 | hypothetical protein                                                          | * | * | * |
| 1678 | 1868 | -                                                                             | -        | NHAL_0367 | NOC_2984 | NWAT_3039 | hypothetical protein                                                          | * | * | * |
| 1679 | 950  | pyridoxal-dependent decarboxylase                                             | TAO_0198 | NHAL_0369 | NOC_2983 | NWAT_3038 | pyridoxal-dependent decarboxylase                                             | * | * | * |
| 1680 | 1814 | -                                                                             | -        | NHAL_0370 | NOC_2982 | NWAT_3037 | CDP-alcohol phosphatidyltransferase                                           | * | * | * |
| 1681 | 2089 | -                                                                             | -        | NHAL_0372 | NOC_2981 | NWAT_3036 | Myo-inositol-1-phosphate synthase                                             | * | * | * |
| 1682 | 2074 | -                                                                             | -        | NHAL_0373 | NOC_2980 | NWAT_3035 | oxidoreductase                                                                | * | * | * |
| 1683 | 2228 | -                                                                             | -        | NHAL_0374 | NOC_2979 | NWAT_3034 | PAS sensor, serine phosphatase RsbU regulator of sigma subunit                | * | * | * |
| 1684 | 2293 | -                                                                             | -        | NHAL_0405 | NOC_2978 | NWAT_3033 | NAD-glutamate dehydrogenase                                                   | * | * | * |
| 1685 | 1739 | -                                                                             | -        | NHAL_0406 | NOC_2977 | NWAT_3032 | putative anti-sigma regulatory factor                                         | * | * | * |
| 1686 | 1626 | -                                                                             | -        | NHAL_0407 | NOC_2976 | NWAT_3031 | anti-sigma factor antagonist                                                  | * | * | * |
| 1687 | 2134 | -                                                                             | -        | NHAL_0408 | NOC_2975 | NWAT_3030 | single-stranded nucleic acid binding R3H domain-containing protein            | * | * | * |
| 1688 | 1712 | -                                                                             | -        | NHAL_0409 | NOC_2974 | NWAT_3029 | DoxX family protein                                                           | * | * | * |
| 1689 | 2137 | -                                                                             | -        | NHAL_0414 | NOC_2973 | NWAT_3028 | hypothetical protein                                                          | * | * | * |
| 1690 | 1783 | -                                                                             | -        | NHAL_0415 | NOC_2972 | NWAT_3027 | FMN-binding domain-containing protein                                         | * | * | * |
| 1691 | 488  | cytochrome c oxidase subunit II                                               | TAO_0314 | NHAL_0417 | NOC_2971 | NWAT_3026 | cytochrome c oxidase subunit II                                               | * | * | * |
| 1692 | 1306 | cytochrome c oxidase subunit I                                                | TAO_0315 | NHAL_0418 | NOC_2970 | NWAT_3025 | cytochrome c oxidase subunit I                                                | * | * | * |
| 1693 | 605  | electron transport protein SCO1/SenC                                          | TAO_0316 | NHAL_0419 | NOC_2969 | NWAT_3024 | electron transport protein SCO1/SenC                                          | * | * | * |
| 1694 | 631  | transmembrane protein                                                         | TAO_0317 | NHAL_0420 | NOC_2968 | NWAT_3023 | transmembrane protein                                                         | * | * | * |
| 1695 | 414  | Rrf2 family transcriptional regulator                                         | TAO_0318 | NHAL_0421 | NOC_2967 | NWAT_3022 | BadM/Rrf2 family transcriptional regulator                                    | * | * | * |
| 1696 | 199  | histone family protein DNA-binding protein                                    | TAO_0319 | NHAL_0424 | NOC_2966 | NWAT_3021 | histone family protein DNA-binding protein                                    | * | * | * |
| 1697 | 2623 | -                                                                             | -        | -         | NOC_2965 | NWAT_3020 | hypothetical protein                                                          | * | * | * |
| 1698 | 2064 | -                                                                             | -        | NHAL_0361 | NOC_2964 | NWAT_3019 | ATPase AAA                                                                    | * | * | * |
| 1699 | 2099 | -                                                                             | -        | NHAL_0360 | NOC_2963 | NWAT_3018 | hypothetical protein                                                          | * | * | * |
| 1700 | 932  | tRNA-dihydrouridine synthase A                                                | TAO_0195 | NHAL_0359 | NOC_2960 | NWAT_3016 | tRNA-dihydrouridine synthase A                                                | * | * | * |
| 1701 | 2508 | -                                                                             | -        | -         | NOC_2888 | NWAT_0202 | hypothetical protein                                                          | * | * | * |
| 1702 | 2820 | -                                                                             | -        | -         | NOC_2887 | NWAT_0203 | hypothetical protein                                                          | * | * | * |
| 1703 | 2507 | -                                                                             | -        | -         | NOC_2886 | NWAT_0204 | transmembrane prediction                                                      | * | * | * |
| 1704 | 2452 | -                                                                             | -        | -         | NOC_2885 | NWAT_0205 | metallothionein family 14                                                     | * | * | * |
| 1705 | 2807 | -                                                                             | -        | -         | NOC_2884 | NWAT_0206 | urea transporter                                                              | * | * | * |
| 1706 | 1904 | urease accessory protein UreD                                                 | TAO_0780 | -         | NOC_2883 | NWAT_0207 | urease accessory protein UreD                                                 | * | * | * |
| 1707 | 1631 | urease subunit gamma                                                          | TAO_0781 | -         | NOC_2882 | NWAT_0208 | urease subunit gamma                                                          | * | * | * |
| 1708 | 1614 | urease subunit beta                                                           | TAO_0782 | -         | NOC_2881 | NWAT_0209 | urease subunit beta                                                           | * | * | * |
| 1709 | 2201 | urease subunit alpha                                                          | TAO_0783 | -         | NOC_2880 | NWAT_0210 | urease subunit alpha                                                          | * | * | * |
| 1710 | 1743 | urease accessory protein UreE                                                 | TAO_0784 | -         | NOC_2879 | NWAT_0211 | UreE urease accessory domain-containing protein                               | * | * | * |
| 1711 | 1849 | urease accessory protein UreF                                                 | TAO_0785 | -         | NOC_2878 | NWAT_0212 | urease accessory protein UreF                                                 | * | * | * |
| 1712 | 110  | urease accessory protein UreG                                                 | TAO_0786 | NHAL_1356 | NOC_2877 | NWAT_0213 | urease accessory protein UreG                                                 | * | * | * |
| 1713 | 1772 | HupE/UreJ protein                                                             | TAO_0787 | -         | NOC_2876 | NWAT_0214 | HupE/UreJ protein                                                             | * | * | * |
| 1714 | 2055 | hypothetical conserved protein                                                | TAO_0788 | -         | NOC_2875 | NWAT_0215 | hypothetical conserved protein                                                | * | * | * |
| 1715 | 1961 | -                                                                             | -        | NHAL_0480 | NOC_2871 | NWAT_0217 | cation diffusion facilitator family transporter                               | * | * | * |
| 1716 | 1749 | -                                                                             | -        | NHAL_0481 | NOC_2870 | NWAT_0218 | MraZ protein                                                                  | * | * | * |

|      |      |                                                                                                                     |          |           |          |           |                                                                                                       |   |   |   |
|------|------|---------------------------------------------------------------------------------------------------------------------|----------|-----------|----------|-----------|-------------------------------------------------------------------------------------------------------|---|---|---|
| 1717 | 844  | S-adenosyl-methyltransferase MraW                                                                                   | TAO_0218 | NHAL_0482 | NOC_2869 | NWAT_0219 | S-adenosyl-methyltransferase MraW                                                                     | * | * | * |
| 1718 | 226  | cell division protein FtsI                                                                                          | TAO_0219 | NHAL_0483 | NOC_2868 | NWAT_0220 | cell division protein FtsI                                                                            | * | * | * |
| 1719 | 1328 | cell division protein FtsI/penicillin-binding protein                                                               | TAO_0220 | NHAL_0484 | NOC_2867 | NWAT_0221 | peptidoglycan glycosyltransferase                                                                     | * | * | * |
| 1720 | 1209 | UDP-N-acetylmuramyl tripeptide synthetase                                                                           | TAO_0221 | NHAL_0485 | NOC_2866 | NWAT_0222 | UDP-N-acetylmuramyl-tripeptide synthetase                                                             | * | * | * |
| 1721 | 1102 | UDP-N-acetylmuramoylalananyl-D-glutamyl-2,6-diaminopimelate/D-alanyl-D-alanyl ligase                                | TAO_0222 | NHAL_0486 | NOC_2865 | NWAT_0223 | UDP-N-acetylmuramoylalananyl-D-glutamyl-2, 6-diaminopimelate/D-alanyl-D-alanyl ligase                 | * | * | * |
| 1722 | 1153 | phospho-N-acetylmuramoyl-pentapeptide-transferase                                                                   | TAO_0223 | NHAL_0487 | NOC_2864 | NWAT_0224 | phospho-N-acetylmuramoyl-pentapeptide- transferase                                                    | * | * | * |
| 1723 | 1146 | UDP-N-acetylmuramoylalanine/D-glutamate ligase                                                                      | TAO_0224 | NHAL_0488 | NOC_2863 | NWAT_0225 | UDP-N-acetylmuramoylalanine/D-glutamate ligase                                                        | * | * | * |
| 1724 | 1150 | cell division protein FtsW                                                                                          | TAO_0225 | NHAL_0489 | NOC_2862 | NWAT_0226 | cell division protein FtsW                                                                            | * | * | * |
| 1725 | 959  | UDP-N-acetylglucosamine--N-acetylmuramyl-(pentapeptide) pyrophosphoryl-undecaprenol N-acetylglucosamine transferase | TAO_0226 | NHAL_0490 | NOC_2861 | NWAT_0227 | UDP-N-acetylglucosamine--N-acetylmuramyl- pyrophosphoryl-undecaprenol N-acetylglucosamine transferase | * | * | * |
| 1726 | 1210 | UDP-N-acetylmuramate--L-alanine ligase                                                                              | TAO_0227 | NHAL_0491 | NOC_2860 | NWAT_0228 | UDP-N-acetylmuramate--L-alanine ligase                                                                | * | * | * |
| 1727 | 841  | UDP-N-acetylenolpyruvoylglucosamine reductase                                                                       | TAO_0228 | NHAL_0492 | NOC_2859 | NWAT_0229 | UDP-N-acetylenolpyruvoylglucosamine reductase                                                         | * | * | * |
| 1728 | 864  | D-alanine--D-alanine ligase                                                                                         | TAO_0229 | NHAL_0493 | NOC_2858 | NWAT_0230 | D-alanine--D-alanine ligase                                                                           | * | * | * |
| 1729 | 699  | cell division protein FtsQ                                                                                          | TAO_0230 | NHAL_0494 | NOC_2857 | NWAT_0231 | cell division protein FtsQ                                                                            | * | * | * |
| 1730 | 1169 | cell division protein FtsA                                                                                          | TAO_0231 | NHAL_0495 | NOC_2856 | NWAT_0232 | cell division protein FtsA                                                                            | * | * | * |
| 1731 | 1086 | cell division protein FtsZ                                                                                          | TAO_0232 | NHAL_0496 | NOC_2855 | NWAT_0233 | cell division protein FtsZ                                                                            | * | * | * |
| 1732 | 976  | UDP-3-0-acyl N-acetylglucosamine deacetylase                                                                        | TAO_0233 | NHAL_0497 | NOC_2854 | NWAT_0234 | UDP-3-0-acyl N-acetylglucosamine deacetylase                                                          | * | * | * |
| 1733 | 235  | hypothetical conserved protein                                                                                      | TAO_0234 | NHAL_0498 | NOC_2853 | NWAT_0235 | hypothetical protein                                                                                  | * | * | * |
| 1734 | 722  | peptidase M23                                                                                                       | TAO_0235 | NHAL_0499 | NOC_2852 | NWAT_0236 | peptidase M23                                                                                         | * | * | * |
| 1735 | 1445 | preprotein translocase subunit SecA                                                                                 | TAO_0236 | NHAL_0500 | NOC_2851 | NWAT_0237 | preprotein translocase subunit SecA                                                                   | * | * | * |
| 1736 | 1064 | arginine biosynthesis bifunctional protein ArgJ                                                                     | TAO_0238 | NHAL_0502 | NOC_2850 | NWAT_0238 | arginine biosynthesis bifunctional protein argJ                                                       | * | * | * |
| 1737 | 278  | rieske (2Fe-2S) domain-containing protein                                                                           | TAO_0240 | NHAL_0503 | NOC_2849 | NWAT_0239 | rieske domain-containing protein                                                                      | * | * | * |
| 1738 | 799  | ketohexokinase                                                                                                      | TAO_0241 | NHAL_0504 | NOC_2848 | NWAT_0240 | PfkB domain-containing protein                                                                        | * | * | * |
| 1739 | 615  | adenylate kinase                                                                                                    | TAO_0242 | NHAL_0505 | NOC_2847 | NWAT_0241 | adenylate kinase                                                                                      | * | * | * |
| 1740 | 1199 | 6-phosphofructokinase                                                                                               | TAO_0243 | NHAL_0506 | NOC_2846 | NWAT_0242 | 6-phosphofructokinase                                                                                 | * | * | * |
| 1741 | 898  | peptidase S49, SppA                                                                                                 | TAO_0244 | NHAL_0507 | NOC_2845 | NWAT_0243 | signal peptide peptidase SppA, 36K type                                                               | * | * | * |
| 1742 | 876  | 23S rRNA pseudouridylate synthase C                                                                                 | TAO_0245 | NHAL_0508 | NOC_2844 | NWAT_0244 | pseudouridine synthase                                                                                | * | * | * |
| 1743 | 1338 | Rne/Rng family ribonuclease                                                                                         | TAO_0246 | NHAL_3417 | NOC_2843 | NWAT_0245 | Rne/Rng family ribonuclease                                                                           | * | * | * |
| 1744 | 1788 | -                                                                                                                   | -        | NHAL_3416 | NOC_2842 | NWAT_0246 | <b>protein-tyrosine phosphatase, low molecular weight</b>                                             | * | * | * |
| 1745 | 1597 | -                                                                                                                   | -        | NHAL_3415 | NOC_2841 | NWAT_0247 | <b>hypothetical protein</b>                                                                           | * | * | * |
| 1746 | 1974 | -                                                                                                                   | -        | NHAL_3413 | NOC_2839 | NWAT_0249 | <b>hypothetical protein</b>                                                                           | * | * | * |
| 1747 | 2664 | -                                                                                                                   | -        | -         | NOC_2838 | NWAT_0250 | <b>nitroreductase</b>                                                                                 | * | * | * |
| 1748 | 368  | 30S ribosomal protein S9                                                                                            | TAO_0360 | NHAL_3475 | NOC_2837 | NWAT_0251 | 30S ribosomal protein S9                                                                              | * | * | * |
| 1749 | 422  | 50S ribosomal protein L13                                                                                           | TAO_0361 | NHAL_3474 | NOC_2836 | NWAT_0252 | 50S ribosomal protein L13                                                                             | * | * | * |
| 1750 | 802  | undecaprenyl pyrophosphate phosphatase                                                                              | TAO_0362 | NHAL_3473 | NOC_2835 | NWAT_0253 | undecaprenyl pyrophosphate phosphatase                                                                | * | * | * |
| 1751 | 1973 | -                                                                                                                   | -        | NHAL_3472 | NOC_2834 | NWAT_0254 | <b>hypothetical protein</b>                                                                           | * | * | * |
| 1752 | 840  | multidrug ABC transporter permease                                                                                  | TAO_0363 | NHAL_3471 | NOC_2833 | NWAT_0255 | ABC transporter permease                                                                              | * | * | * |
| 1753 | 953  | ABC transporter                                                                                                     | TAO_0364 | NHAL_3470 | NOC_2832 | NWAT_0256 | ABC transporter                                                                                       | * | * | * |
| 1754 | 647  | DNA mismatch repair endonuclease mutH                                                                               | TAO_0365 | NHAL_3469 | NOC_2831 | NWAT_0257 | DNA mismatch repair endonuclease mutH                                                                 | * | * | * |
| 1755 | 295  | hypothetical conserved protein                                                                                      | TAO_0367 | NHAL_3468 | NOC_2830 | NWAT_0258 | hypothetical protein                                                                                  | * | * | * |
| 1756 | 1396 | phosphomethylpyrimidine synthase thiC                                                                               | TAO_0370 | NHAL_3467 | NOC_2828 | NWAT_0260 | thiamine biosynthesis protein thiC                                                                    | * | * | * |
| 1757 | 1181 | phosphoribosylamine/glycine ligase                                                                                  | TAO_0371 | NHAL_3466 | NOC_2827 | NWAT_0261 | phosphoribosylamine--glycine ligase                                                                   | * | * | * |
| 1758 | 986  | phosphoribulokinase                                                                                                 | TAO_0372 | NHAL_3465 | NOC_2826 | NWAT_0262 | phosphoribulokinase                                                                                   | * | * | * |
| 1759 | 477  | SUA5/yciO/yrdC domain-containing protein                                                                            | TAO_0373 | NHAL_3464 | NOC_2825 | NWAT_0263 | SUA5/yciO/yrdC domain-containing protein                                                              | * | * | * |
| 1760 | 1065 | coproporphyrinogen III oxidase                                                                                      | TAO_0374 | NHAL_3463 | NOC_2824 | NWAT_0264 | coproporphyrinogen III oxidase                                                                        | * | * | * |
| 1761 | 428  | TrmH family RNA methyltransferase                                                                                   | TAO_0375 | NHAL_3462 | NOC_2823 | NWAT_0265 | TrmH family RNA methyltransferase                                                                     | * | * | * |
| 1762 | 998  | dihydroorotate dehydrogenase                                                                                        | TAO_0376 | NHAL_3461 | NOC_2822 | NWAT_0266 | dihydroorotate dehydrogenase                                                                          | * | * | * |
| 1763 | 2053 | -                                                                                                                   | -        | NHAL_3460 | NOC_2821 | NWAT_0267 | <b>membrane-bound metal-dependent hydrolase</b>                                                       | * | * | * |
| 1764 | 1840 | -                                                                                                                   | -        | NHAL_3459 | NOC_2820 | NWAT_0268 | <b>putative tetR family transcriptional regulator</b>                                                 | * | * | * |
| 1765 | 2826 | -                                                                                                                   | -        | -         | NOC_2819 | NWAT_0269 | <b>hypothetical protein</b>                                                                           | * | * | * |

|      |      |                                                         |          |              |           |                                                    |                                                                                            |   |   |
|------|------|---------------------------------------------------------|----------|--------------|-----------|----------------------------------------------------|--------------------------------------------------------------------------------------------|---|---|
| 1766 | 1902 | SAM-dependent methyltransferase                         | TAO_1101 | NOC_2818     | NWAT_0270 | SAM-dependent methyltransferase                    | *                                                                                          |   |   |
| 1767 | 1880 | S-isoprenylcysteine methyltransferase-like protein      | TAO_1100 | NOC_2817     | NWAT_0271 | S-isoprenylcysteine methyltransferase-like protein | *                                                                                          |   |   |
| 1768 | 737  | methyltransferase type 11                               | TAO_0377 | NHAL_3458    | NOC_2816  | NWAT_0272                                          | methyltransferase type 11                                                                  | * | * |
| 1769 | 407  | ribonuclease H                                          | TAO_0378 | NHAL_3457    | NOC_2815  | NWAT_0273                                          | ribonuclease H                                                                             | * | * |
| 1770 | 557  | DNA polymerase III subunit epsilon                      | TAO_0379 | NHAL_3456    | NOC_2814  | NWAT_0274                                          | DNA polymerase III subunit epsilon                                                         | * | * |
| 1771 | 1021 | heat-inducible transcription repressor HrcA             | TAO_0380 | NHAL_3455    | NOC_2813  | NWAT_0275                                          | heat-inducible transcription repressor HrcA                                                | * | * |
| 1772 | 501  | GrpE protein HSP-70 cofactor                            | TAO_0381 | NHAL_3454    | NOC_2812  | NWAT_0276                                          | GrpE protein HSP-70 cofactor                                                               | * | * |
| 1773 | 1378 | molecular chaperone DnaK                                | TAO_0382 | NHAL_3453    | NOC_2811  | NWAT_0277                                          | molecular chaperone DnaK                                                                   | * | * |
| 1774 | 1165 | molecular chaperone DnaJ                                | TAO_0383 | NHAL_3452    | NOC_2810  | NWAT_0278                                          | molecular chaperone DnaJ                                                                   | * | * |
| 1775 | 712  | dihydrodipicolinate reductase                           | TAO_0384 | NHAL_3451    | NOC_2809  | NWAT_0279                                          | dihydrodipicolinate reductase                                                              | * | * |
| 1776 | 1397 | transketolase                                           | TAO_0385 | NHAL_3450    | NOC_2808  | NWAT_0280                                          | transketolase                                                                              | * | * |
| 1777 | 1045 | glyceraldehyde-3-phosphate dehydrogenase                | TAO_0386 | NHAL_3449    | NOC_2807  | NWAT_0281                                          | glyceraldehyde-3-phosphate dehydrogenase                                                   | * | * |
| 1778 | 1134 | phosphoglycerate kinase                                 | TAO_0387 | NHAL_3448    | NOC_2806  | NWAT_0282                                          | phosphoglycerate kinase                                                                    | * | * |
| 1779 | 1271 | pyruvate kinase                                         | TAO_0388 | NHAL_3447    | NOC_2805  | NWAT_0283                                          | pyruvate kinase                                                                            | * | * |
| 1780 | 1115 | fructose-bisphosphate aldolase class II                 | TAO_0389 | NHAL_3446    | NOC_2804  | NWAT_0284                                          | fructose-bisphosphate aldolase class II                                                    | * | * |
| 1781 | 907  | major facilitator superfamily nucleoside/H(+) symporter | TAO_1632 | NHAL_0322    | NOC_2803  | NWAT_0285                                          | major facilitator superfamily nucleoside/H(+) symporter                                    | * | * |
| 1782 | 2006 | -                                                       | -        | NHAL_0324    | NOC_2802  | NWAT_0286                                          | <b>malate dehydrogenase, NAD-dependent</b>                                                 | * |   |
| 1783 | 2125 | -                                                       | -        | NHAL_0326    | NOC_2801  | NWAT_0287                                          | <b>divalent cation transporter</b>                                                         | * |   |
| 1784 | 1330 | phosphoenolpyruvate-protein phosphotransferase          | TAO_1629 | NHAL_0327    | NOC_2800  | NWAT_0288                                          | phosphoenolpyruvate-protein phosphotransferase                                             | * | * |
| 1785 | 196  | phosphocarrier protein Hpr                              | TAO_1628 | NHAL_0328    | NOC_2799  | NWAT_0289                                          | system, phosphocarrier protein Hpr                                                         | * | * |
| 1786 | 333  | PTS system fructose subfamily IIA component             | TAO_1627 | NHAL_0329    | NOC_2798  | NWAT_0290                                          | PTS system fructose subfamily transporter subunit IIA                                      | * | * |
| 1787 | 897  | glmZ(sRNA)-inactivating NTPase                          | TAO_1626 | NHAL_0330    | NOC_2797  | NWAT_0291                                          | GlmZ(sRNA)-inactivating NTPase                                                             | * | * |
| 1788 | 450  | Hpr serine kinase domain-containing protein             | TAO_1625 | NHAL_0331    | NOC_2796  | NWAT_0292                                          | Hpr serine kinase domain-containing protein                                                | * | * |
| 1789 | 373  | PTS IIA-like nitrogen-regulatory protein PtsN           | TAO_1624 | NHAL_0332    | NOC_2795  | NWAT_0293                                          | putative PTS IIA-like nitrogen-regulatory protein PtsN                                     | * | * |
| 1790 | 262  | ribosomal subunit interface protein                     | TAO_1623 | NHAL_0333    | NOC_2794  | NWAT_0294                                          | ribosomal subunit interface protein                                                        | * | * |
| 1791 | 1152 | RNA polymerase sigma 54 subunit RpoN                    | TAO_1622 | NHAL_0334    | NOC_2793  | NWAT_0295                                          | RNA polymerase sigma 54 subunit RpoN                                                       | * | * |
| 1792 | 776  | ABC transporter ATP-binding protein                     | TAO_1621 | NHAL_0335    | NOC_2792  | NWAT_0296                                          | ABC transporter protein                                                                    | * | * |
| 1793 | 608  | lipopolysaccharide transport periplasmic protein LptA   | TAO_1620 | NHAL_0336    | NOC_2791  | NWAT_0297                                          | lipopolysaccharide transport periplasmic protein LptA                                      | * | * |
| 1794 | 378  | hypothetical conserved protein                          | TAO_1619 | NHAL_0337    | NOC_2790  | NWAT_0298                                          | hypothetical protein                                                                       | * | * |
| 1795 | 506  | 3-deoxy-D-manno-octulosonate 8-phosphate phosphatase    | TAO_1618 | NHAL_0338    | NOC_2789  | NWAT_0299                                          | 3-deoxy-D-manno-octulosonate 8-phosphate phosphatase                                       | * | * |
| 1796 | 963  | sugar phosphate isomerase                               | TAO_1617 | NHAL_0339    | NOC_2788  | NWAT_0300                                          | sugar phosphate isomerase                                                                  | * | * |
| 1797 | 622  | VacJ family lipoprotein                                 | TAO_1616 | NHAL_0340    | NOC_2787  | NWAT_0301                                          | VacJ family lipoprotein                                                                    | * | * |
| 1798 | 842  | ABC transporter ATP-binding protein YrbF                | TAO_1615 | NHAL_0341    | NOC_2786  | NWAT_0302                                          | ABC transporter protein                                                                    | * | * |
| 1799 | 814  | ABC transporter permease                                | TAO_1614 | NHAL_0342    | NOC_2785  | NWAT_0303                                          | ABC transporter permease                                                                   | * | * |
| 1800 | 402  | ABC transporter substrate-binding protein               | TAO_1613 | NHAL_0343    | NOC_2784  | NWAT_0304                                          | ABC-type transport system involved in resistance to organic solvents periplasmic component | * | * |
| 1801 | 90   | toluene tolerance protein                               | TAO_1612 | NHAL_0344    | NOC_2782  | NWAT_0306                                          | toluene tolerance protein                                                                  | * | * |
| 1802 | 190  | sulfate transporter/antisigma-factor antagonist STAS    | TAO_1611 | NHAL_0345    | NOC_2783  | NWAT_0305                                          | sulfate transporter/antisigma-factor antagonist STAS                                       | * | * |
| 1803 | 176  | BolA family protein                                     | TAO_1610 | NHAL_0348    | NOC_2781  | NWAT_0307                                          | BolA family protein                                                                        | * | * |
| 1804 | 1204 | UDP-N-acetylglucosamine 1-carboxyvinyltransferase       | TAO_1609 | NHAL_0349    | NOC_2780  | NWAT_0308                                          | UDP-N-acetylglucosamine 1-carboxyvinyltransferase                                          | * | * |
| 1805 | 630  | ATP phosphoribosyltransferase                           | TAO_1608 | NHAL_0350    | NOC_2779  | NWAT_0309                                          | ATP phosphoribosyltransferase                                                              | * | * |
| 1806 | 1198 | histidinol dehydrogenase                                | TAO_1607 | NHAL_0351    | NOC_2778  | NWAT_0310                                          | histidinol dehydrogenase                                                                   | * | * |
| 1807 | 1026 | histidinol-phosphate aminotransferase                   | TAO_1606 | NHAL_0352    | NOC_2777  | NWAT_0311                                          | histidinol-phosphate aminotransferase                                                      | * | * |
| 1808 | 1949 | -                                                       | -        | NHAL_0142    | NOC_2776  | NWAT_0312                                          | <b>NAD-dependent epimerase/dehydratase</b>                                                 | * |   |
| 1809 | 2214 | -                                                       | -        | NHAL_0146    | NOC_2774  | NWAT_0314                                          | <b>nitrilase/cyanide hydratase and apolipoprotein N-acyltransferase</b>                    | * |   |
| 1810 | 1319 | ABC transporter ATP-binding protein                     | TAO_0107 | NHAL_0149    | NOC_2773  | NWAT_0315                                          | ABC transporter protein                                                                    | * | * |
| 1811 | 1163 | ABC transporter permease                                | TAO_0108 | NHAL_0150    | NOC_2772  | NWAT_0316                                          | binding-protein-dependent transport system inner membrane protein                          | * | * |
| 1812 | 1245 | ABC transporter permease                                | TAO_0109 | NHAL_0151    | NOC_2771  | NWAT_0317                                          | binding-protein-dependent transport system inner membrane protein                          | * | * |
| 1813 | 1365 | ABC transporter substrate-binding protein               | TAO_0110 | NHAL_0152    | NOC_2770  | NWAT_0318                                          | extracellular solute-binding protein                                                       | * | * |
| 1814 | 239  | RNP-1 like RNA-binding protein                          | TAO_0111 | NHAL_0153    | NOC_2769  | NWAT_0327                                          | RNP-1 like RNA-binding protein                                                             | * | * |
| 1815 | 2305 | -                                                       | -        | NHAL_0155(1) | NOC_2740  |                                                    | <b>ATP-dependent endonuclease of the OLD family-like protein</b>                           | * |   |

|      |      |                                                            |          |           |              |                                                                    |   |   |   |
|------|------|------------------------------------------------------------|----------|-----------|--------------|--------------------------------------------------------------------|---|---|---|
| 1816 | 1716 | -                                                          | -        | NOC_2920  | NWAT_3009    | hypothetical protein                                               | * |   |   |
| 1817 | 2463 | -                                                          | -        | NOC_2919  | NWAT_3007    | hypothetical protein                                               | * |   |   |
| 1818 | 2867 | -                                                          | -        | NOC_2916  | NWAT_3005    | aldehyde dehydrogenase                                             | * |   |   |
| 1819 | 2592 | -                                                          | -        | NOC_2915  | NWAT_3004    | hypothetical protein                                               | * |   |   |
| 1820 | 2200 | -                                                          | -        | NHAL_0093 | NWAT_3001    | hypothetical protein                                               | * |   |   |
| 1821 | 1613 | -                                                          | -        | NHAL_3409 | NWAT_2999    | hypothetical protein                                               | * |   |   |
| 1822 | 130  | -                                                          | -        | NHAL_3000 | NWAT_2995    | hypothetical protein                                               | * |   |   |
| 1823 | 1623 | -                                                          | -        | NHAL_2355 | NWAT_2993    | nucleotidyltransferase substrate binding protein                   | * |   |   |
| 1824 | 1796 | -                                                          | -        | NHAL_3141 | NWAT_2989    | hypothetical protein                                               | * |   |   |
| 1825 | 1781 | -                                                          | -        | NHAL_3140 | NWAT_2988    | electron transport protein SCO1/SenC                               | * |   |   |
| 1826 | 2147 | -                                                          | -        | NHAL_3139 | NWAT_2987    | hypothetical protein                                               | * |   |   |
| 1827 | 1414 | ribonuclease R                                             | TAO_0324 | NHAL_0436 | NWAT_2986    | ribonuclease R                                                     | * | * | * |
| 1828 | 835  | phosphatidylserine decarboxylase                           | TAO_0325 | NHAL_0438 | NWAT_2984    | phosphatidylserine decarboxylase                                   | * | * | * |
| 1829 | 1339 | general secretory pathway protein E                        | TAO_0326 | NHAL_0439 | NWAT_2983    | general secretory pathway protein E                                | * | * | * |
| 1830 | 1173 | type II secretion system protein                           | TAO_0327 | NHAL_0440 | NWAT_2982    | type II secretion system F protein                                 | * | * | * |
| 1831 | 439  | general secretion pathway protein G                        | TAO_0328 | NHAL_0441 | NWAT_2981    | general secretion pathway protein G                                | * | * | * |
| 1832 | 350  | general secretion pathway protein H                        | TAO_0329 | NHAL_0442 | NWAT_2980    | general secretion pathway protein H                                | * | * | * |
| 1833 | 221  | general secretion pathway protein H                        | TAO_0330 | NHAL_0443 | NWAT_2979    | general secretion pathway protein H                                | * | * | * |
| 1834 | 2035 | -                                                          | -        | NHAL_0444 | NWAT_2978    | hypothetical protein                                               | * |   |   |
| 1835 | 2080 | -                                                          | -        | NHAL_0445 | NWAT_2977    | group 1 glycosyl transferase                                       | * |   |   |
| 1836 | 2152 | -                                                          | -        | NHAL_0584 | NWAT_2403    | TRAP dicarboxylate transporter subunit DctM                        | * |   |   |
| 1837 | 1819 | -                                                          | -        | NHAL_0585 | NWAT_2402    | tripartite ATP-independent periplasmic transporter DctQ component  | * |   |   |
| 1838 | 358  | D-tyrosyl-tRNA( Tyr) deacylase                             | TAO_0568 | NHAL_0586 | NWAT_2401    | D-tyrosyl-tRNA( Tyr) deacylase                                     | * | * | * |
| 1839 | 918  | proline iminopeptidase                                     | TAO_0569 | NHAL_0587 | NWAT_2400    | proline iminopeptidase                                             | * | * | * |
| 1840 | 1044 | succinyl-coA synthetase subunit beta                       | TAO_0570 | NHAL_0588 | NWAT_2399    | succinyl-coA synthetase subunit beta                               | * | * | * |
| 1841 | 908  | succinyl-coA synthetase subunit alpha                      | TAO_0571 | NHAL_0589 | NWAT_2398    | succinyl-coA synthetase subunit alpha                              | * | * | * |
| 1842 | 341  | nitrogen regulatory protein P-II                           | TAO_0572 | NHAL_0590 | NWAT_2397    | nitrogen regulatory protein P-II                                   | * | * | * |
| 1843 | 742  | outer membrane assembly lipoprotein YfiO                   | TAO_0573 | NHAL_0591 | NWAT_2396    | outer membrane assembly lipoprotein YfiO                           | * | * | * |
| 1844 | 135  | hypothetical conserved protein (divided, N-term side)      | TAO_0574 | NHAL_0592 | NWAT_2395    | ErfK/YbiS/YcfS/YnhG family protein                                 | * | * | * |
| 1845 | 140  | lipoprotein                                                | TAO_0575 | NHAL_0593 | NWAT_2394    | lipoprotein                                                        | * | * | * |
| 1846 | 820  | inositol monophosphatase                                   | TAO_0576 | NHAL_0594 | NWAT_2393    | inositol monophosphatase                                           | * | * | * |
| 1847 | 1384 | GTP-binding protein typA                                   | TAO_0577 | NHAL_0595 | NWAT_2392    | GTP-binding protein typA                                           | * | * | * |
| 1848 | 151  | hypothetical conserved protein                             | TAO_0578 | NHAL_0596 | NWAT_2391    | hypothetical protein                                               | * | * | * |
| 1849 | 1023 | UDP-3-O-(3-hydroxymyristoyl) glucosamine N-acyltransferase | TAO_0347 | NHAL_3519 | NWAT_2888    | UDP-3-O-(3-hydroxymyristoyl) glucosamine N-acyltransferase         | * | * | * |
| 1850 | 474  | hypothetical conserved protein                             | TAO_0346 | NHAL_3520 | NWAT_2891    | hypothetical protein                                               | * | * | * |
| 1851 | 2822 | -                                                          | -        | NOC_0227  | NWAT_2894(1) | PAS/PAC sensor(s)-containing diguanylate cyclase/phosphodiesterase | * |   |   |
| 1852 | 2874 | -                                                          | -        | NOC_0226  | NWAT_2894(2) | PAS/PAC sensor(s)-containing diguanylate cyclase/phosphodiesterase | * |   |   |
| 1853 | 1237 | DNA repair protein radA                                    | TAO_0345 | NHAL_3524 | NWAT_2895    | DNA repair protein radA                                            | * | * | * |
| 1854 | 956  | alanine racemase                                           | TAO_0344 | NHAL_3525 | NWAT_2896    | alanine racemase                                                   | * | * | * |
| 1855 | 1266 | replicative DNA helicase                                   | TAO_0343 | NHAL_3526 | NWAT_2897    | replicative DNA helicase                                           | * | * | * |
| 1856 | 372  | 50S ribosomal protein L9                                   | TAO_0342 | NHAL_3527 | NWAT_2898    | 50S ribosomal protein L9                                           | * | * | * |
| 1857 | 234  | 30S ribosomal protein S18                                  | TAO_0341 | NHAL_3528 | NWAT_2899    | 30S ribosomal protein S18                                          | * | * | * |
| 1858 | 346  | 30S ribosomal protein S6                                   | TAO_0340 | NHAL_3529 | NWAT_2900    | 30S ribosomal protein S6                                           | * | * | * |
| 1859 | 665  | RNA methyltransferase TrmH                                 | TAO_0339 | NHAL_3530 | NWAT_2901    | TrmH family RNA methyltransferase                                  | * | * | * |
| 1860 | 2258 | -                                                          | -        | NHAL_3534 | NWAT_2902    | $\alpha$ -amylase catalytic subunit                                | * |   |   |
| 1861 | 612  | endonuclease V                                             | TAO_0337 | NHAL_3538 | NWAT_2903    | deoxyribonuclease V                                                | * | * | * |
| 1862 | 184  | glutaredoxin                                               | TAO_0336 | NHAL_3540 | NWAT_2904    | glutaredoxin                                                       | * | * | * |
| 1863 | 170  | hypothetical conserved protein                             | TAO_0511 | NHAL_0462 | NWAT_2905    | hypothetical protein                                               | * | * | * |
| 1864 | 181  | type IV pilus assembly pilZ                                | TAO_0510 | NHAL_0461 | NWAT_2906    | type IV pilus assembly pilZ                                        | * | * | * |
| 1865 | 1871 | -                                                          | -        | NHAL_0460 | NWAT_2907    | CDP-alcohol phosphatidyltransferase                                | * |   |   |

|      |      |                                                                                                       |          |           |             |              |                                                                                                |   |   |   |
|------|------|-------------------------------------------------------------------------------------------------------|----------|-----------|-------------|--------------|------------------------------------------------------------------------------------------------|---|---|---|
| 1866 | 1346 | <b>3-polyprenyl-4-hydroxybenzoate decarboxylase</b>                                                   | TAO_0509 | NHAL_0458 | NOC_0211    | NWAT_2908    | 3-polyprenyl-4-hydroxybenzoate decarboxylase                                                   | * | * | * |
| 1867 | 751  | <b>hypothetical conserved protein</b>                                                                 | TAO_0508 | NHAL_0457 | NOC_0210    | NWAT_2909    | hypothetical protein                                                                           | * | * | * |
| 1868 | 772  | <b>exodeoxyribonuclease III</b>                                                                       | TAO_0506 | NHAL_0456 | NOC_0209    | NWAT_2910    | exodeoxyribonuclease III                                                                       | * | * | * |
| 1869 | 2253 | -                                                                                                     | -        | NHAL_0455 | NOC_0208    | NWAT_2911    | <b>oligopeptidase A</b>                                                                        | * |   |   |
| 1870 | 2239 | -                                                                                                     | -        | NHAL_0454 | NOC_0207    | NWAT_2912    | <b>putative PAS/PAC sensor protein</b>                                                         | * |   |   |
| 1871 | 1641 | -                                                                                                     | -        | NHAL_1223 | NOC_0206    | NWAT_2913    | <b>stage II sporulation E family protein</b>                                                   | * |   |   |
| 1872 | 1399 | <b>heavy metal translocating P-type ATPase</b>                                                        | TAO_0089 | NHAL_0168 | NOC_0205    | NWAT_2914    | heavy metal translocating P-type ATPase                                                        | * | * | * |
| 1873 | 162  | <b>heavy metal transport/detoxification protein</b>                                                   | TAO_0088 | NHAL_0167 | NOC_0204    | NWAT_2915    | heavy metal transport/detoxification protein                                                   | * | * | * |
| 1874 | 1670 | -                                                                                                     | -        | NHAL_0166 | NOC_0203    | NWAT_2916    | <b>Cu(I)-responsive transcriptional regulator</b>                                              | * |   |   |
| 1875 | 1332 | <b>chaperonin GroEL</b>                                                                               | TAO_1792 | NHAL_0165 | NOC_2921    | NWAT_2918    | chaperonin GroEL                                                                               | * | * | * |
| 1876 | 269  | <b>molecular chaperone GroES</b>                                                                      | TAO_1793 | NHAL_0164 | NOC_2922    | NWAT_2919    | co-chaperonin GroES                                                                            | * | * | * |
| 1877 | 339  | <b>FxsA cytoplasmic membrane protein</b>                                                              | TAO_1794 | NHAL_0163 | NOC_2923    | NWAT_2920    | FxsA cytoplasmic membrane protein                                                              | * | * | * |
| 1878 | 265  | <b>hypothetical conserved protein</b>                                                                 | TAO_1189 | NHAL_1775 | NOC_2925    | NWAT_2924    | hypothetical protein                                                                           | * | * | * |
| 1879 | 192  | <b>methyltransferase (divided, N-term side)</b>                                                       | TAO_1190 | NHAL_1774 | NOC_2926    | NWAT_2925    | type 11 methyltransferase                                                                      | * | * | * |
| 1880 | 592  | <b>type III restriction endonuclease StyLTI</b>                                                       | TAO_1688 | NHAL_3377 | NOC_2928    | NWAT_2929    | site-specific DNA-methyltransferase (adenine-specific)                                         | * | * | * |
| 1881 | 2558 | -                                                                                                     | -        | -         | NOC_2929    | NWAT_2930    | <b>hypothetical protein</b>                                                                    | * |   |   |
| 1882 | 700  | <b>hemin-degrading family protein</b>                                                                 | TAO_1191 | NHAL_1773 | NOC_2932    | NWAT_2932    | hemin-degrading family protein                                                                 | * | * | * |
| 1883 | 1829 | -                                                                                                     | -        | NHAL_1772 | NOC_2933    | NWAT_2933    | <b>hypothetical protein</b>                                                                    | * |   |   |
| 1884 | 850  | <b>N5-glutamine S-adenosyl-L-methionine-dependent methyltransferase</b>                               | TAO_0193 | NHAL_0269 | NOC_2934    | NWAT_2934    | N5-glutamine S-adenosyl-L-methionine-dependent methyltransferase                               | * | * | * |
| 1885 | 1282 | <b>3-isopropylmalate dehydratase large subunit</b>                                                    | TAO_0194 | NHAL_0270 | NOC_2935    | NWAT_2935    | 3-isopropylmalate dehydratase large subunit                                                    | * | * | * |
| 1886 | 2283 | -                                                                                                     | -        | NHAL_0271 | NOC_2936    | NWAT_2936    | <b>Acriflavin resistance protein</b>                                                           | * |   |   |
| 1887 | 46   | <b>secretion protein HlyD</b>                                                                         | TAO_0448 | NHAL_0272 | NOC_2937    | NWAT_2937    | RND family efflux transporter MFP subunit                                                      | * | * |   |
| 1888 | 1113 | <b>chorismate synthase</b>                                                                            | TAO_1145 | NHAL_0274 | NOC_2938    | NWAT_2939    | chorismate synthase                                                                            | * | * | * |
| 1889 | 1677 | -                                                                                                     | -        | NHAL_3092 | NOC_2940    | NWAT_2942    | <b>hypothetical protein</b>                                                                    | * |   |   |
| 1890 | 2561 | -                                                                                                     | -        | -         | NOC_2941    | NWAT_2946    | <b>hypothetical protein</b>                                                                    | * |   |   |
| 1891 | 2485 | -                                                                                                     | -        | -         | NOC_2942    | NWAT_2947    | <b>hypothetical protein</b>                                                                    | * |   |   |
| 1892 | 2781 | -                                                                                                     | -        | -         | NOC_2943    | NWAT_2949    | <b>choloylglycine hydrolase</b>                                                                | * |   |   |
| 1893 | 1477 | -                                                                                                     | -        | NHAL_2577 | NOC_2944    | NWAT_2951    | <b>XRE family transcriptional regulator</b>                                                    | * |   |   |
| 1894 | 2534 | -                                                                                                     | -        | -         | NOC_2945    | NWAT_2952    | <b>hypothetical protein</b>                                                                    | * |   |   |
| 1895 | 2618 | -                                                                                                     | -        | -         | NOC_2949    | NWAT_2955    | <b>hypothetical protein</b>                                                                    | * |   |   |
| 1896 | 2877 | -                                                                                                     | -        | -         | NOC_2950    | NWAT_2956    | <b>ABC efflux pump, fused ATPase and inner membrane subunits</b>                               | * |   |   |
| 1897 | 2750 | -                                                                                                     | -        | -         | NOC_2951    | NWAT_2957    | <b>universal stress protein UspA</b>                                                           | * |   |   |
| 1898 | 2584 | -                                                                                                     | -        | -         | NOC_2954    | NWAT_2961    | <b>hypothetical protein</b>                                                                    | * |   |   |
| 1899 | 1552 | -                                                                                                     | -        | NHAL_1681 | NOC_2955    | NWAT_2962    | <b>hypothetical protein</b>                                                                    | * |   |   |
| 1900 | 308  | -                                                                                                     | -        | NHAL_0094 | NOC_2957(2) | NWAT_2963(2) | <b>ferredoxin-dependent glutamate synthase</b>                                                 | * |   |   |
| 1901 | 1542 | -                                                                                                     | -        | NHAL_2660 | NOC_2957(1) | NWAT_2963(1) | <b>ferredoxin-dependent glutamate synthase</b>                                                 | * |   |   |
| 1902 | 2290 | -                                                                                                     | -        | NHAL_2538 | NOC_1206    | NWAT_1090    | <b>B12-dependent methionine synthase</b>                                                       | * |   |   |
| 1903 | 2801 | -                                                                                                     | -        | -         | NOC_1207    | NWAT_1091    | <b>hypothetical protein</b>                                                                    | * |   |   |
| 1904 | 2743 | -                                                                                                     | -        | -         | NOC_1208    | NWAT_1092    | <b>hypothetical protein</b>                                                                    | * |   |   |
| 1905 | 2844 | -                                                                                                     | -        | -         | NOC_1209    | NWAT_1093    | <b>hypothetical protein</b>                                                                    | * |   |   |
| 1906 | 1263 | <b>phosphate starvation protein phoH</b>                                                              | TAO_0763 | NHAL_2537 | NOC_1210    | NWAT_1094    | phoH family protein                                                                            | * | * | * |
| 1907 | 1519 | <b>hypothetical protein</b>                                                                           | TAO_1564 | -         | NOC_1211    | NWAT_1095    | CMP/dCMP deaminase zinc-binding protein                                                        | * |   |   |
| 1908 | 519  | <b>guanylate kinase</b>                                                                               | TAO_0593 | NHAL_0755 | NOC_1212    | NWAT_1096    | guanylate kinase                                                                               | * | * | * |
| 1909 | 166  | <b>DNA-directed RNA polymerase subunit omega</b>                                                      | TAO_0594 | NHAL_0757 | NOC_1213    | NWAT_1097    | DNA-directed RNA polymerase subunit omega                                                      | * | * | * |
| 1910 | 1380 | <b>bifunctional (p)ppGpp synthetase II/ guanosine-3',5'-bis pyrophosphate 3'-pyrophosphohydrolase</b> | TAO_0595 | NHAL_0758 | NOC_1214    | NWAT_1098    | bifunctional (p)ppGpp synthetase II/ guanosine-3',5'-bis pyrophosphate 3'-pyrophosphohydrolase | * | * | * |
| 1911 | 325  | <b>endoribonuclease L-PSP</b>                                                                         | TAO_0596 | NHAL_0759 | NOC_1215    | NWAT_1099    | endoribonuclease L-PSP                                                                         | * | * | * |
| 1912 | 1366 | <b>ATP-dependent DNA helicase RecG</b>                                                                | TAO_0597 | NHAL_0760 | NOC_1216    | NWAT_1100    | ATP-dependent DNA helicase RecG                                                                | * | * | * |
| 1913 | 890  | <b>4-hydroxybenzoate octaprenyltransferase</b>                                                        | TAO_0598 | NHAL_0761 | NOC_1217    | NWAT_1101    | 4-hydroxybenzoate octaprenyltransferase                                                        | * | * | * |

|      |      |                                                      |          |                        |          |           |                                                      |   |   |   |
|------|------|------------------------------------------------------|----------|------------------------|----------|-----------|------------------------------------------------------|---|---|---|
| 1914 | 705  | nuclease                                             | TAO_0599 | NHAL_0762              | NOC_1218 | NWAT_1102 | nuclease                                             | * | * | * |
| 1915 | 613  | sugar fermentation stimulation protein               | TAO_0816 | NHAL_0899              | NOC_2279 | NWAT_2111 | sugar fermentation stimulation protein               | * | * | * |
| 1916 | 246  | hypothetical conserved protein                       | TAO_0817 | NHAL_0902              | NOC_2278 | NWAT_2110 | hypothetical protein                                 | * | * | * |
| 1917 | 1455 | isoleucyl-tRNA synthetase                            | TAO_0818 | NHAL_0903              | NOC_2277 | NWAT_2109 | isoleucyl-tRNA synthetase                            | * | * | * |
| 1918 | 481  | lipoprotein signal peptidase                         | TAO_0819 | NHAL_0905              | NOC_2276 | NWAT_2108 | lipoprotein signal peptidase                         | * | * | * |
| 1919 | 114  | pilus assembly protein                               | TAO_0820 | NHAL_0906              | NOC_2275 | NWAT_2107 | general secretion pathway protein H                  | * | * | * |
| 1920 | 2292 | -                                                    | -        | NHAL_0907              | NOC_2274 | NWAT_2106 | <b>fimbrial assembly family protein</b>              | * |   |   |
| 1921 | 1766 | -                                                    | -        | NHAL_0909              | NOC_2273 | NWAT_2105 | <b>type IV pilus assembly protein pilX</b>           | * |   |   |
|      |      |                                                      |          | NHAL_0908              |          |           |                                                      |   |   |   |
| 1922 | 63   | hypothetical conserved protein                       | TAO_0822 | NHAL_0910              | NOC_2272 | NWAT_2104 | type IV pilus assembly protein pilW                  | * | * |   |
|      |      |                                                      |          | NHAL_0911              |          |           |                                                      |   |   |   |
| 1923 | 1681 | -                                                    | -        | NHAL_0911              | NOC_2271 | NWAT_2103 | <b>type IV pilus modification protein pilV</b>       | * |   |   |
| 1924 | 938  | glycine oxidase thiO                                 | TAO_0825 | NHAL_0915              | NOC_2269 | NWAT_2101 | glycine oxidase thiO                                 | * | * | * |
| 1925 | 283  | Fe(II) trafficking protein YggX                      | TAO_0826 | NHAL_0917              | NOC_2268 | NWAT_2100 | Fe(II) trafficking protein YggX                      | * | * | * |
| 1926 | 1051 | A/G-specific adenine glycosylase                     | TAO_0827 | NHAL_0918              | NOC_2267 | NWAT_2099 | A/G-specific adenine glycosylase                     | * | * | * |
| 1927 | 1733 | -                                                    | -        | NHAL_0919              | NOC_2266 | NWAT_2098 | <b>hypothetical protein</b>                          | * |   |   |
| 1928 | 1272 | AsmA family protein                                  | TAO_0828 | NHAL_0920              | NOC_2265 | NWAT_2097 | AsmA family protein                                  | * | * | * |
| 1929 | 1952 | -                                                    | -        | NHAL_0921              | NOC_2264 | NWAT_2096 | <b>hypothetical protein</b>                          | * |   |   |
| 1930 | 2112 | -                                                    | -        | NHAL_0922              | NOC_2263 | NWAT_2095 | <b>hypothetical protein</b>                          | * |   |   |
| 1931 | 796  | cytochrome C assembly protein                        | TAO_0829 | NHAL_0923              | NOC_2262 | NWAT_2094 | cytochrome c assembly protein                        | * | * | * |
| 1932 | 1230 | signal recognition particle protein                  | TAO_0830 | NHAL_0924              | NOC_2261 | NWAT_2093 | signal recognition particle protein                  | * | * | * |
| 1933 | 228  | 30S ribosomal protein S16                            | TAO_0831 | NHAL_0925              | NOC_2260 | NWAT_2092 | 30S ribosomal protein S16                            | * | * | * |
| 1934 | 456  | 16S rRNA processing protein rimM                     | TAO_0832 | NHAL_0926              | NOC_2259 | NWAT_2091 | 16S rRNA-processing protein rimM                     | * | * | * |
| 1935 | 763  | tRNA (guanine-N(1)-)-methyltransferase               | TAO_0833 | NHAL_0927              | NOC_2258 | NWAT_2090 | tRNA (guanine-N(1)-)-methyltransferase               | * | * | * |
| 1936 | 322  | 50S ribosomal protein L19                            | TAO_0834 | NHAL_0928              | NOC_2257 | NWAT_2089 | 50S ribosomal protein L19                            | * | * | * |
| 1937 | 392  | methylated-DNA--protein-cysteine methyltransferase   | TAO_0835 | NHAL_0929              | NOC_2256 | NWAT_2088 | methylated-DNA--protein-cysteine methyltransferase   | * | * | * |
| 1938 | 880  | tyrosine recombinase XerD                            | TAO_0836 | NHAL_0930              | NOC_2255 | NWAT_2087 | tyrosine recombinase XerD                            | * | * | * |
| 1939 | 472  | nucleotide-binding protein                           | TAO_0837 | NHAL_0931              | NOC_2254 | NWAT_2086 | nucleotide-binding protein                           | * | * | * |
| 1940 | 671  | thiol-disulfide interchange protein DsbC             | TAO_0838 | NHAL_0932              | NOC_2253 | NWAT_2085 | thiol-disulfide interchange protein DsbC             | * | * | * |
| 1941 | 686  | UDP-2,3-diacetylglucosamine hydrolase                | TAO_0839 | NHAL_0933              | NOC_2252 | NWAT_2084 | UDP-2,3-diacetylglucosamine hydrolase                | * | * | * |
| 1942 | 510  | cyclophilin type peptidyl-prolyl cis-trans isomerase | TAO_0840 | NHAL_0934              | NOC_2251 | NWAT_2083 | cyclophilin type peptidyl-prolyl cis-trans isomerase | * | * | * |
| 1943 | 1247 | glutamyl-tRNA synthetase                             | TAO_0841 | NHAL_0935              | NOC_2250 | NWAT_2082 | glutamyl-tRNA synthetase                             | * | * | * |
| 1944 | 1251 | cysteinyl-tRNA synthetase                            | TAO_0842 | NHAL_0936              | NOC_2249 | NWAT_2081 | cysteinyl-tRNA synthetase                            | * | * | * |
| 1945 | 893  | methylenetetrahydrofolate dehydrogenase              | TAO_0843 | NHAL_0937              | NOC_2248 | NWAT_2080 | methylenetetrahydrofolate dehydrogenase              | * | * | * |
| 1946 | 97   | NnrS family protein                                  | TAO_1103 | NHAL_1832<br>NHAL_1851 | NOC_1410 | NWAT_1679 | NnrS family protein                                  | * | * |   |
|      |      |                                                      |          | NHAL_1833<br>NHAL_1852 |          |           |                                                      |   |   |   |
| 1947 | 92   | bacterioferritin                                     | TAO_1102 | NHAL_1833<br>NHAL_1852 | NOC_1411 | NWAT_1678 | bacterioferritin                                     | * | * |   |
| 1948 | 555  | hypothetical conserved protein                       | TAO_1264 | NHAL_1641              | NOC_1412 | NWAT_1677 | hypothetical protein                                 | * | * | * |
| 1949 | 1004 | magnesium and cobalt transporter corA                | TAO_1257 | NHAL_1648              | NOC_1416 | NWAT_1676 | magnesium and cobalt transporter corA                | * | * | * |
| 1950 | 684  | hypothetical conserved protein                       | TAO_1256 | NHAL_1649              | NOC_1417 | NWAT_1675 | hypothetical protein                                 | * | * | * |
| 1951 | 2287 | -                                                    | -        | NHAL_1650              | NOC_1418 | NWAT_1674 | <b>CzcA family heavy metal efflux pump</b>           | * |   |   |
| 1952 | 2027 | -                                                    | -        | NHAL_1651              | NOC_1419 | NWAT_1673 | <b>RND family efflux transporter MFP subunit</b>     | * |   |   |
| 1953 | 943  | outer membrane efflux protein                        | TAO_1253 | NHAL_1652              | NOC_1420 | NWAT_1672 | outer membrane efflux protein                        | * | * | * |
| 1954 | 243  | hypothetical conserved protein                       | TAO_1252 | NHAL_1653              | NOC_1421 | NWAT_1671 | hypothetical protein                                 | * | * | * |
| 1955 | 1073 | RND family efflux transporter MFP subunit            | TAO_1247 | NHAL_1673              | NOC_1536 | NWAT_1601 | RND family efflux transporter MFP subunit            | * | * | * |
| 1956 | 1017 | outer membrane efflux protein                        | TAO_1246 | NHAL_1674              | NOC_1537 | NWAT_1600 | outer membrane efflux protein                        | * | * | * |
| 1957 | 266  | hypothetical conserved protein                       | TAO_1245 | NHAL_1675              | NOC_1538 | NWAT_1599 | hypothetical protein                                 | * | * | * |
| 1958 | 1624 | -                                                    | -        | NHAL_1698              | NOC_1539 | NWAT_1598 | <b>hypothetical protein</b>                          | * |   |   |
| 1959 | 2484 | -                                                    | -        | -                      | NOC_1540 | NWAT_1597 | <b>hypothetical protein</b>                          | * |   |   |
| 1960 | 2855 | -                                                    | -        | -                      | NOC_1541 | NWAT_1596 | <b>outer membrane efflux protein</b>                 | * |   |   |
| 1961 | 2863 | -                                                    | -        | -                      | NOC_1542 | NWAT_1595 | <b>multicopper oxidase type 3</b>                    | * |   |   |



|      |      |                                                                      |          |           |           |                      |                                                                       |   |   |   |
|------|------|----------------------------------------------------------------------|----------|-----------|-----------|----------------------|-----------------------------------------------------------------------|---|---|---|
| 1962 | 2689 | -                                                                    | -        | NOC_1543  | NWAT_1592 | hypothetical protein | *                                                                     |   |   |   |
| 1963 | 2609 | -                                                                    | -        | NOC_1544  | NWAT_1591 | hypothetical protein | *                                                                     |   |   |   |
| 1964 | 1092 | ferrochelatase                                                       | TAO_0464 | NHAL_1056 | NOC_1545  | NWAT_1590            | ferrochelatase                                                        | * | * | * |
| 1965 | 1803 | -                                                                    | -        | NHAL_1059 | NOC_1546  | NWAT_1589            | protein-L-isoaspartate(D-aspartate) O-methyltransferase               | * |   |   |
| 1966 | 1127 | poly(A) polymerase                                                   | TAO_0467 | NHAL_1070 | NOC_0883  | NWAT_0750            | poly(A) polymerase                                                    | * | * | * |
| 1967 | 398  | 2-amino-4-hydroxy-6-hydroxymethylidihydropteridine pyrophosphokinase | TAO_0468 | NHAL_1071 | NOC_0884  | NWAT_0751            | 2-amino-4-hydroxy-6- hydroxymethylidihydropteridine pyrophosphokinase | * | * | * |
| 1968 | 791  | 3-methyl-2-oxobutanoate hydroxymethyltransferase                     | TAO_0469 | NHAL_1072 | NOC_0885  | NWAT_0752            | 3-methyl-2-oxobutanoate hydroxymethyltransferase                      | * | * | * |
| 1969 | 746  | pantoate/beta-alanine ligase                                         | TAO_0470 | NHAL_1073 | NOC_0886  | NWAT_0753            | pantoate/beta-alanine ligase                                          | * | * | * |
| 1970 | 1651 | aspartate 1-decarboxylase                                            | TAO_0471 | NHAL_1074 | NOC_0887  |                      | aspartate 1-decarboxylase                                             | * |   |   |
| 1971 | 1617 | -                                                                    | -        | NHAL_1075 | NOC_0888  | NWAT_0754            | acylphosphatase                                                       | * |   |   |
| 1972 | 1665 | -                                                                    | -        | NHAL_1078 | NOC_0889  | NWAT_0755            | multicopper oxidase, type 3                                           | * |   |   |
| 1973 | 543  | cytochrome P460                                                      | TAO_0472 | NHAL_1083 | NOC_0890  | NWAT_0756            | cytochrome P460                                                       | * | * | * |
| 1974 | 1310 | GntR family transcriptional regulator                                | TAO_0473 | NHAL_1084 | NOC_0891  | NWAT_0757            | GntR family transcriptional regulator                                 | * | * | * |
| 1975 | 1359 | hydroxylamine oxidase                                                | TAO_0474 | NHAL_1085 | NOC_0892  | NWAT_0758            | hydroxylamine oxidase                                                 | * | * | * |
| 1976 | 925  | hypothetical conserved protein                                       | TAO_0475 | NHAL_1086 | NOC_0893  | NWAT_0759            | hypothetical protein                                                  | * | * | * |
| 1977 | 119  | hypothetical protein                                                 | TAO_0477 | NHAL_1087 | NOC_0894  | NWAT_0760            | cytochrome c-554 precursor                                            | * | * | * |
| 1978 | 695  | NapC/NirT cytochrome c domain-containing protein                     | TAO_0478 | NHAL_1088 | NOC_0895  | NWAT_0761            | NapC/NirT cytochrome c domain-containing protein                      | * | * | * |
| 1979 | 1801 | -                                                                    | -        | NHAL_1089 | NOC_0896  | NWAT_0762            | lytic transglycosylase, catalytic                                     | * |   |   |
| 1980 | 1344 | prolyl-tRNA synthetase                                               | TAO_0479 | NHAL_1090 | NOC_0897  | NWAT_0763            | prolyl-tRNA synthetase                                                | * | * | * |
| 1981 | 1483 | -                                                                    | -        | NHAL_0413 | NOC_0898  | NWAT_0765            | hypothetical protein                                                  | * |   |   |
| 1982 | 396  | nucleoside-diphosphate kinase                                        | TAO_1413 | NHAL_1091 | NOC_0899  | NWAT_0766            | nucleoside-diphosphate kinase                                         | * | * | * |
| 1983 | 1072 | ribosomal RNA large subunit methyltransferase N                      | TAO_1412 | NHAL_1092 | NOC_0900  | NWAT_0767            | radical SAM enzyme, Cfr family                                        | * | * | * |
| 1984 | 596  | type IV pilus biogenesis/stability protein pilW                      | TAO_1411 | NHAL_1093 | NOC_0901  | NWAT_0768            | type IV pilus biogenesis/stability protein pilW                       | * | * | * |
| 1985 | 1184 | histidyl-tRNA synthetase                                             | TAO_1410 | NHAL_1095 | NOC_0902  | NWAT_0769            | histidyl-tRNA synthetase                                              | * | * | * |
| 1986 | 1327 | glucose-6-phosphate isomerase                                        | TAO_1409 | NHAL_1096 | NOC_0903  | NWAT_0770            | glucose-6-phosphate isomerase                                         | * | * | * |
| 1987 | 1428 | 1,4-alpha-glucan branching enzyme GlgB                               | TAO_1408 | NHAL_1097 | NOC_0904  | NWAT_0771            | 1,4-alpha-glucan branching protein                                    | * | * | * |
| 1988 | 1261 | glucose-1-phosphate adenyltransferase                                | TAO_1407 | NHAL_1098 | NOC_0905  | NWAT_0772            | glucose-1-phosphate adenyltransferase                                 | * | * | * |
| 1989 | 1267 | 4-alpha-glucanotransferase                                           | TAO_1406 | NHAL_1099 | NOC_0906  | NWAT_0773            | 4-alpha-glucanotransferase                                            | * | * | * |
| 1990 | 344  | glycine cleavage system protein H                                    | TAO_1405 | NHAL_1100 | NOC_0907  | NWAT_0774            | glycine cleavage system H protein                                     | * | * | * |
| 1991 | 1242 | glycine dehydrogenase subunit I                                      | TAO_1404 | NHAL_1101 | NOC_0908  | NWAT_0775            | glycine dehydrogenase subunit I                                       | * | * | * |
| 1992 | 1010 | anhydro-N-acetylmuramic acid kinase                                  | TAO_1403 | NHAL_1102 | NOC_0909  | NWAT_0776            | anhydro-N-acetylmuramic acid kinase                                   | * | * | * |
| 1993 | 1067 | peptidase M23                                                        | TAO_1402 | NHAL_1103 | NOC_0910  | NWAT_0777            | peptidase M23                                                         | * | * | * |
| 1994 | 1156 | tyrosyl-tRNA synthetase                                              | TAO_1401 | NHAL_1104 | NOC_0911  | NWAT_0778            | tyrosyl-tRNA synthetase                                               | * | * | * |
| 1995 | 1639 | -                                                                    | -        | NHAL_1106 | NOC_0912  | NWAT_0779            | hypothetical protein                                                  | * |   |   |
| 1996 | 740  | phosphatidylethanolamine N-methyltransferase                         | TAO_1398 | NHAL_1108 | NOC_0914  | NWAT_0780            | phosphatidylethanolamine N-methyltransferase                          | * | * | * |
| 1997 | 1786 | -                                                                    | -        | NHAL_1109 | NOC_0915  | NWAT_0781            | hypothetical protein                                                  | * |   |   |
| 1998 | 626  | rhomboid family protein                                              | TAO_1397 | NHAL_1110 | NOC_0916  | NWAT_0783            | rhomboid family protein                                               | * | * | * |
| 1999 | 583  | peptidase M22 glycoprotease                                          | TAO_1396 | NHAL_1111 | NOC_0917  | NWAT_0784            | peptidase M22, glycoprotease                                          | * | * | * |
| 2000 | 1937 | -                                                                    | -        | NHAL_1112 | NOC_0918  | NWAT_0785            | radical SAM domain-containing protein                                 | * |   |   |
| 2001 | 173  | arsenite S-adenosylmethyltransferase                                 | TAO_0485 | NHAL_1114 | NOC_0586  | NWAT_0786            | type 11 methyltransferase                                             | * | * | * |
| 2002 | 1420 | DNA mismatch repair protein MutS                                     | TAO_1395 | NHAL_1115 | NOC_0919  | NWAT_0787            | DNA mismatch repair protein MutS                                      | * | * | * |
| 2003 | 413  | damage inducible protein CinA                                        | TAO_1394 | NHAL_1116 | NOC_0922  | NWAT_0790            | damage inducible protein CinA                                         | * | * | * |
| 2004 | 1774 | -                                                                    | -        | NHAL_1117 | NOC_0923  | NWAT_0791            | 2'-5' RNA ligase                                                      | * |   |   |
| 2005 | 1042 | DNA recombination protein RecA                                       | TAO_1393 | NHAL_1118 | NOC_0924  | NWAT_0792            | DNA recombination protein RecA                                        | * | * | * |
| 2006 | 331  | RecX family transcriptional regulator                                | TAO_1392 | NHAL_1119 | NOC_0925  | NWAT_0793            | RecX family transcriptional regulator                                 | * | * | * |
| 2007 | 1431 | alanyl-tRNA synthetase                                               | TAO_1391 | NHAL_1120 | NOC_0926  | NWAT_0794            | alanyl-tRNA synthetase                                                | * | * | * |
| 2008 | 1132 | aspartate kinase                                                     | TAO_1390 | NHAL_1121 | NOC_0927  | NWAT_0795            | aspartate kinase                                                      | * | * | * |
| 2009 | 183  | carbon storage regulator                                             | TAO_1389 | NHAL_1122 | NOC_0928  | NWAT_0796            | carbon storage regulator                                              | * | * | * |
| 2010 | 1178 | alpha-amylase                                                        | TAO_1322 | NHAL_2846 | NOC_0930  | NWAT_0797            | alpha-amylase                                                         | * | * | * |

|      |      |                                                             |          |           |          |           |                                                                   |   |   |   |
|------|------|-------------------------------------------------------------|----------|-----------|----------|-----------|-------------------------------------------------------------------|---|---|---|
| 2011 | 1912 | -                                                           | -        | NHAL_0839 | NOC_0931 | NWAT_0798 | hypothetical protein                                              | * |   |   |
| 2012 | 1636 | -                                                           | -        | NHAL_0840 | NOC_0932 | NWAT_0799 | hypothetical protein                                              | * |   |   |
| 2013 | 2045 | -                                                           | -        | NHAL_0841 | NOC_0933 | NWAT_0801 | binding-protein-dependent transport system inner membrane protein | * |   |   |
| 2014 | 2148 | -                                                           | -        | NHAL_0842 | NOC_0934 | NWAT_0802 | binding-protein-dependent transporters inner membrane component   | * |   |   |
| 2015 | 2400 | -                                                           | -        | NHAL_0843 | NOC_0935 |           | ion transporter                                                   | * |   |   |
| 2016 | 2227 | -                                                           | -        | NHAL_0844 | NOC_0936 | NWAT_0804 | oligopeptide/dipeptide ABC transporter ATPase                     | * |   |   |
| 2017 | 1111 | hypothetical conserved protein                              | TAO_1461 | NHAL_0846 | NOC_0937 | NWAT_0805 | hypothetical protein                                              | * | * | * |
| 2018 | 602  | 2-nonaprenyl-3-methyl-6-methoxy-1,4-benzoquinol hydroxylase | TAO_1460 | NHAL_0847 | NOC_0938 | NWAT_0806 | 2-nonaprenyl-3-methyl-6-methoxy-1,4-benzoquinol hydroxylase       | * | * | * |
| 2019 | 1003 | cytochrome C biogenesis protein CcmI                        | TAO_1458 | NHAL_0849 | NOC_0940 | NWAT_0808 | cytochrome C biogenesis protein CcmI                              | * | * | * |
| 2020 | 417  | cytochrome C biogenesis protein                             | TAO_1457 | NHAL_0850 | NOC_0941 | NWAT_0809 | cytochrome C biogenesis protein                                   | * | * | * |
| 2021 | 556  | periplasmic protein thiol/disulfide oxidoreductase DsbE     | TAO_1456 | NHAL_0851 | NOC_0942 | NWAT_0810 | periplasmic protein thiol-disulfide oxidoreductase DsbE           | * | * | * |
| 2022 | 1401 | cytochrome c-type biogenesis protein CcmF                   | TAO_1455 | NHAL_0852 | NOC_0943 | NWAT_0811 | cytochrome c-type biogenesis protein CcmF                         | * | * | * |
| 2023 | 416  | cytochrome c-type biogenesis protein CcmE                   | TAO_1454 | NHAL_0853 | NOC_0944 | NWAT_0812 | cytochrome c-type biogenesis protein CcmE                         | * | * | * |
| 2024 | 2385 | -                                                           | -        | NHAL_0854 |          | NWAT_0813 | heme exporter protein CcmD                                        | * |   |   |
| 2025 | 915  | heme ABC transporter permease                               | TAO_1453 | NHAL_0855 | NOC_0946 | NWAT_0814 | heme exporter protein CcmC                                        | * | * | * |
| 2026 | 636  | cytochrome c-type biogenesis protein CcmB                   | TAO_1452 | NHAL_0856 | NOC_0947 | NWAT_0815 | cytochrome c-type biogenesis protein CcmB                         | * | * | * |
| 2027 | 610  | heme exporter protein CcmA                                  | TAO_1451 | NHAL_0857 | NOC_0948 | NWAT_0816 | heme exporter protein CcmA                                        | * | * | * |
| 2028 | 1243 | hypothetical conserved protein                              | TAO_1450 | NHAL_0858 | NOC_0949 | NWAT_0817 | hypothetical protein                                              | * | * | * |
| 2029 | 1241 | HSRI-like GTP-binding protein                               | TAO_1449 | NHAL_0859 | NOC_0950 | NWAT_0818 | HSRI-like GTP-binding protein                                     | * | * | * |
| 2030 | 851  | S-adenosylmethionine decarboxylase                          | TAO_1448 | NHAL_0860 | NOC_0951 | NWAT_0819 | S-adenosylmethionine decarboxylase                                | * | * | * |
| 2031 | 384  | glyoxalase/bleomycin resistance protein/dioxygenase         | TAO_1447 | NHAL_0861 | NOC_0952 | NWAT_0820 | glyoxalase/bleomycin resistance protein/dioxygenase               | * | * | * |
| 2032 | 401  | OsmC family protein                                         | TAO_1446 | NHAL_0862 | NOC_0953 | NWAT_0821 | OsmC family protein                                               | * | * | * |
| 2033 | 664  | cyclic nucleotide-binding protein                           | TAO_1445 | NHAL_0863 | NOC_0954 | NWAT_0822 | cyclic nucleotide-binding protein                                 | * | * | * |
| 2034 | 1611 | -                                                           | -        | NHAL_0744 | NOC_2224 | NWAT_0869 | hypothetical protein                                              | * |   |   |
| 2035 | 1863 | -                                                           | -        | NHAL_3588 | NOC_2223 | NWAT_0870 | hypothetical protein                                              | * |   |   |
| 2036 | 2032 | -                                                           | -        | NHAL_3587 | NOC_2222 | NWAT_0871 | D-alanine--D-alanine ligase                                       | * |   |   |
| 2037 | 2263 | -                                                           | -        | NHAL_3586 | NOC_2221 | NWAT_0872 | hydrolase cocE/NonD family protein                                | * |   |   |
| 2038 | 2059 | -                                                           | -        | NHAL_3585 | NOC_2220 | NWAT_0873 | hypothetical protein                                              | * |   |   |
| 2039 | 1080 | ABC transporter permease                                    | TAO_1168 | NHAL_1200 | NOC_2216 | NWAT_0874 | ABC transporter permease                                          | * | * | * |
| 2040 | 1122 | ABC transporter ATP-binding protein                         | TAO_1167 | NHAL_1201 | NOC_2215 | NWAT_0875 | ABC transporter ATP-binding protein                               | * | * | * |
| 2041 | 648  | ABC transporter ATP-binding protein                         | TAO_1166 | NHAL_1202 | NOC_2214 | NWAT_0876 | ABC transporter protein                                           | * | * | * |
| 2042 | 948  | RND family efflux transporter MFP subunit                   | TAO_1165 | NHAL_1203 | NOC_2213 | NWAT_0877 | RND family efflux transporter MFP subunit                         | * | * | * |
| 2043 | 823  | 2-methylisocitrate lyase                                    | TAO_1164 | NHAL_1206 | NOC_2209 | NWAT_0880 | 2-methylisocitrate lyase                                          | * | * | * |
| 2044 | 1097 | 2-methylcitrate synthase/citrate synthase II                | TAO_1163 | NHAL_1207 | NOC_2208 | NWAT_0881 | 2-methylcitrate synthase/citrate synthase II                      | * | * | * |
| 2045 | 1254 | 2-methylcitrate dehydratase                                 | TAO_1162 | NHAL_1208 | NOC_2207 | NWAT_0882 | 2-methylcitrate dehydratase                                       | * | * | * |
| 2046 | 2493 | -                                                           | -        | NHAL_1209 | NOC_2206 |           | AbrB family transcriptional regulator                             | * |   |   |
| 2047 | 2612 | -                                                           | -        | NHAL_1210 | NOC_2205 |           | twitching motility protein pilT                                   | * |   |   |
| 2048 | 2505 | -                                                           | -        |           | NOC_1843 | NWAT_1269 | hypothetical protein                                              | * |   |   |
| 2049 | 2714 | -                                                           | -        |           | NOC_1842 | NWAT_1270 | hypothetical protein                                              | * |   |   |
| 2050 | 2107 | -                                                           | -        | NHAL_1248 | NOC_1840 | NWAT_1274 | divalent cation transporter                                       | * |   |   |
| 2051 | 815  | inositol monophosphatase                                    | TAO_0853 | NHAL_1250 | NOC_1838 | NWAT_1275 | inositol monophosphatase                                          | * | * | * |
| 2052 | 2015 | -                                                           | -        | NHAL_1251 | NOC_1837 | NWAT_1276 | LysR family transcriptional regulator                             | * |   |   |
| 2053 | 489  | ABC transporter ATP-binding protein                         | TAO_1193 | NHAL_1735 | NOC_1836 | NWAT_1277 | ABC transporter protein                                           | * | * | * |
| 2054 | 812  | ABC transporter permease                                    | TAO_1192 | NHAL_1736 | NOC_1835 | NWAT_1278 | ABC transporter permease                                          | * | * | * |
| 2055 | 825  | DNA/RNA non-specific endonuclease                           | TAO_1067 | NHAL_3061 | NOC_1834 | NWAT_1279 | DNA/RNA non-specific endonuclease                                 | * | * | * |
| 2056 | 274  | hypothetical protein                                        | TAO_1066 | NHAL_3067 | NOC_1833 | NWAT_1280 | hypothetical protein                                              | * | * | * |
| 2057 | 148  | hypothetical conserved protein                              | TAO_0186 | NHAL_3070 | NOC_1832 | NWAT_1281 | LemA family protein                                               | * | * | * |
| 2058 | 189  | heat shock protein HtpX                                     | TAO_0185 | NHAL_3071 | NOC_1831 | NWAT_1282 | peptidase M48 Ste24p                                              | * | * | * |
| 2059 | 1810 | -                                                           | -        | NHAL_3073 | NOC_1830 | NWAT_1284 | Appr-I-p processing domain-containing protein                     | * |   |   |
| 2060 | 326  | hypothetical conserved protein                              | TAO_1065 | NHAL_3074 | NOC_1829 | NWAT_1285 | hypothetical protein                                              | * | * | * |

|      |      |                                                              |                 |              |              |                                                             |                                                                           |   |   |   |
|------|------|--------------------------------------------------------------|-----------------|--------------|--------------|-------------------------------------------------------------|---------------------------------------------------------------------------|---|---|---|
| 2061 | 1706 | <b>GntR family transcriptional regulator</b>                 | <b>TAO_0463</b> | NOC_1828     | NWAT_1286    | RND family efflux transporter MFP subunit                   | *                                                                         |   |   |   |
| 2062 | 2891 | -                                                            | -               | NOC_1826     | NWAT_1288    | <b>amyl<math>\alpha</math>-1,6-glucosidase</b>              | *                                                                         |   |   |   |
| 2063 | 2899 | -                                                            | -               | NOC_1825     | NWAT_1289    | <b>hypothetical protein</b>                                 | *                                                                         |   |   |   |
| 2064 | 1723 | -                                                            | NHAL_0448       | NOC_1824     | NWAT_1291    | <b>hypothetical protein</b>                                 | *                                                                         |   |   |   |
| 2065 | 1773 | -                                                            | NHAL_0449       | NOC_1823     | NWAT_1292    | <b>hypothetical protein</b>                                 | *                                                                         |   |   |   |
| 2066 | 847  | -                                                            | NHAL_1731       | NOC_1820     | NWAT_1293    | <b>TonB-dependent receptor</b>                              | *                                                                         |   |   |   |
| 2067 | 59   | <b>hypothetical protein</b>                                  | <b>TAO_1194</b> | NHAL_1793    | NOC_1819     | NWAT_1294                                                   | PepSY-associated TM helix domain-containing protein                       | * | * | * |
| 2068 | 2876 | -                                                            | -               | NOC_1818     | NWAT_1295    | <b>type I secretion system ATPase, prtD</b>                 | *                                                                         |   |   |   |
| 2069 | 1481 | -                                                            | NHAL_0835       | NOC_1817     | NWAT_1296    | <b>HlyD family type I secretion membrane fusion protein</b> | *                                                                         |   |   |   |
| 2070 | 2717 | -                                                            | -               | NOC_1816     | NWAT_1297    | <b>hemolysin-type calcium-binding region</b>                | *                                                                         |   |   |   |
| 2071 | 2785 | -                                                            | -               | NOC_1815     | NWAT_1298    | <b>major facilitator superfamily protein</b>                | *                                                                         |   |   |   |
| 2072 | 2872 | -                                                            | -               | NOC_1814     | NWAT_1299(1) | <b>siderophore synthetase component, lucA/lucC</b>          | *                                                                         |   |   |   |
| 2073 | 1704 | -                                                            | NHAL_1788       | NOC_1813     | NWAT_1299(2) | <b>aerobactin siderophore biosynthesis protein lucB</b>     | *                                                                         |   |   |   |
| 2074 | 2875 | -                                                            | -               | NOC_1812     | NWAT_1300    | <b>siderophore synthetase component, lucA/lucC</b>          | *                                                                         |   |   |   |
| 2075 | 1599 | -                                                            | NHAL_1789       | NOC_1811     | NWAT_1301    | <b>L-lysine 6-monooxygenase (NADPH)</b>                     | *                                                                         |   |   |   |
| 2076 | 945  | <b>5'-nucleotidase</b>                                       | <b>TAO_1295</b> | NHAL_2760    | NOC_1810     | NWAT_1302                                                   | 5'-nucleotidase                                                           | * | * | * |
| 2077 | 1945 | -                                                            | NHAL_0897       | NOC_1809     | NWAT_1303    | <b>adenine-specific DNA-methyltransferase</b>               | *                                                                         |   |   |   |
| 2078 | 117  | <b>hypothetical protein</b>                                  | <b>TAO_1415</b> | NHAL_0896    | NOC_1808     | NWAT_1304                                                   | restriction modification system DNA specificity domain-containing protein | * | * | * |
| 2079 | 2732 | -                                                            | -               | NOC_1805     | NWAT_1305    | <b>filamentation induced by cAMP protein fic</b>            | *                                                                         |   |   |   |
| 2080 | 134  | <b>hypothetical protein</b>                                  | <b>TAO_1423</b> | NHAL_0892(2) | NOC_1804(2)  | NWAT_1306(2)                                                | HsdR family type I site-specific deoxyribonuclease                        | * | * | * |
| 2081 | 2270 | -                                                            | NHAL_1339       | NOC_1802     | NWAT_1308    | <b>hypothetical protein</b>                                 | *                                                                         |   |   |   |
| 2082 | 2266 | -                                                            | NHAL_1340       | NOC_1800     | NWAT_1309    | <b>hypothetical protein</b>                                 | *                                                                         |   |   |   |
| 2083 | 73   | <b>NADH-flavin oxidoreductase/NADH oxidase</b>               | <b>TAO_1379</b> | NHAL_1341    | NOC_1799     | NWAT_1310                                                   | NADH-flavin oxidoreductase/NADH oxidase                                   | * | * | * |
| 2084 | 2368 | -                                                            | NHAL_1342       | -            | NWAT_1311    | <b>hypothetical protein</b>                                 | *                                                                         |   |   |   |
| 2085 | 2208 | -                                                            | NHAL_1343       | NOC_1798     | NWAT_1312    | <b>hypothetical protein</b>                                 | *                                                                         |   |   |   |
| 2086 | 1219 | <b>cytochrome C</b>                                          | <b>TAO_0996</b> | NHAL_1344    | NOC_1797     | NWAT_1314                                                   | cytochrome c class I                                                      | * | * | * |
| 2087 | 282  | <b>hypothetical conserved protein (divided, N-term side)</b> | <b>TAO_0771</b> | NHAL_1345    | NOC_1795     | NWAT_1316                                                   | hypothetical protein                                                      | * | * | * |
| 2088 | 2745 | -                                                            | -               | NOC_1789     | NWAT_1317    | <b>formyltetrahydrofolate deformylase</b>                   | *                                                                         |   |   |   |
| 2089 | 2211 | <b>aconitate hydratase</b>                                   | <b>TAO_1013</b> | NOC_1788     | NWAT_1319    | aconitate hydratase 1                                       | *                                                                         |   |   |   |
| 2090 | 2788 | -                                                            | -               | NOC_1786     | NWAT_1322    | <b>hypothetical protein</b>                                 | *                                                                         |   |   |   |
| 2091 | 1776 | -                                                            | NHAL_2854       | NOC_1785     | NWAT_1323    | <b>magnesium transporter</b>                                | *                                                                         |   |   |   |
| 2092 | 2778 | -                                                            | -               | NOC_1782     | NWAT_1327    | <b>cation diffusion facilitator family transporter</b>      | *                                                                         |   |   |   |
| 2093 | 2061 | -                                                            | NHAL_2711       | NOC_1781     | NWAT_1334    | <b>ABC-2 type transporter</b>                               | *                                                                         |   |   |   |
| 2094 | 2075 | -                                                            | NHAL_2712       | NOC_1780     | NWAT_1335    | <b>ABC-2 type transporter</b>                               | *                                                                         |   |   |   |
| 2095 | 2189 | -                                                            | NHAL_2714       | NOC_1779     | NWAT_1336    | <b>ABC transporter-like protein</b>                         | *                                                                         |   |   |   |
| 2096 | 1975 | -                                                            | NHAL_2715       | NOC_1778     | NWAT_1337    | <b>HlyD family secretion protein</b>                        | *                                                                         |   |   |   |
| 2097 | 2093 | -                                                            | NHAL_2719       | NOC_1777     | NWAT_1338    | <b><math>\beta</math>-ketoacyl synthase</b>                 | *                                                                         |   |   |   |
| 2098 | 1836 | -                                                            | NHAL_3184       | NOC_1776     | NWAT_1339    | <b>peptide methionine sulfoxide reductase</b>               | *                                                                         |   |   |   |
| 2099 | 1866 | -                                                            | NHAL_0792       | NOC_1774     | NWAT_1341    | <b>periplasmic or secreted lipoprotein</b>                  | *                                                                         |   |   |   |
| 2100 | 214  | <b>histone-like DNA-binding protein</b>                      | <b>TAO_1467</b> | NHAL_0794    | NOC_1772     | NWAT_1343                                                   | histone-like DNA-binding protein                                          | * | * | * |
| 2101 | 1320 | <b>peptidyl-prolyl cis-trans isomerase ppiD</b>              | <b>TAO_1466</b> | NHAL_0795    | NOC_1771     | NWAT_1344                                                   | PpiC-type peptidyl-prolyl cis-trans isomerase                             | * | * | * |
| 2102 | 2110 | -                                                            | NHAL_0796       | NOC_1770     | NWAT_1345    | <b>sodium/dicarboxylate symporter</b>                       | *                                                                         |   |   |   |
| 2103 | 819  | <b>enoyl acyl carrier protein (ACP) reductase</b>            | <b>TAO_1465</b> | NHAL_0797    | NOC_1769     | NWAT_1346                                                   | short-chain dehydrogenase/reductase SDR                                   | * | * | * |
| 2104 | 2259 | -                                                            | NHAL_0798       | NOC_1768     | NWAT_1347    | <b>family 5 extracellular solute-binding protein</b>        | *                                                                         |   |   |   |
| 2105 | 1988 | -                                                            | NHAL_3041       | NOC_1767     | NWAT_1348    | <b>cytochrome c oxidase subunit II</b>                      | *                                                                         |   |   |   |
| 2106 | 2279 | -                                                            | NHAL_3042       | NOC_1766     | NWAT_1349    | <b>cytochrome c oxidase subunit I</b>                       | *                                                                         |   |   |   |
| 2107 | 1687 | -                                                            | NHAL_3043       | NOC_1765     | NWAT_1350    | <b>transmembrane prediction</b>                             | *                                                                         |   |   |   |
| 2108 | 1989 | -                                                            | NHAL_3045       | NOC_1764     | NWAT_1351    | <b>cytochrome c, class I</b>                                | *                                                                         |   |   |   |
| 2109 | 2673 | -                                                            | -               | NOC_1763     | NWAT_1352    | <b>hypothetical protein</b>                                 | *                                                                         |   |   |   |
| 2110 | 2498 | -                                                            | -               | NOC_1761     | NWAT_1355    | <b>hypothetical protein</b>                                 | *                                                                         |   |   |   |

|      |      |                                                                             |          |           |          |           |                                                                                |   |   |   |
|------|------|-----------------------------------------------------------------------------|----------|-----------|----------|-----------|--------------------------------------------------------------------------------|---|---|---|
| 2111 | 1572 | -                                                                           | -        | NHAL_0809 | NOC_1760 | NWAT_1356 | hypothetical protein                                                           | * |   |   |
| 2112 | 674  | alpha/beta hydrolase fold protein                                           | TAO_1161 | NHAL_1224 | NOC_1759 | NWAT_1357 | alpha/beta hydrolase fold protein                                              | * | * | * |
| 2113 | 2225 | -                                                                           | -        | NHAL_1225 | NOC_1758 | NWAT_1358 | response regulator receiver modulated diguanylate cyclase/phosphodiesterase    | * |   |   |
| 2114 | 2585 | -                                                                           | -        | -         | NOC_1757 | NWAT_1359 | response regulator receiver protein                                            | * |   |   |
| 2115 | 1891 | -                                                                           | -        | NHAL_1458 | NOC_1756 | NWAT_1360 | PAS sensor signal transduction histidine kinase                                | * |   |   |
| 2116 | 887  | Gfo1dh/MocA family oxidoreductase                                           | TAO_1160 | NHAL_1228 | NOC_1755 | NWAT_1361 | oxidoreductase                                                                 | * | * | * |
| 2117 | 1077 | degT/DnrJ/EryC1/strS aminotransferase                                       | TAO_1159 | NHAL_1229 | NOC_1754 | NWAT_1362 | degT/DnrJ/EryC1/strS aminotransferase                                          | * | * | * |
| 2118 | 1082 | lipid-A-disaccharide synthase                                               | TAO_1158 | NHAL_1230 | NOC_1753 | NWAT_1363 | lipid-A-disaccharide synthase                                                  | * | * | * |
| 2119 | 777  | acyl-ACP--UDP-N- acetylglucosamine O-acyltransferase                        | TAO_1157 | NHAL_1231 | NOC_1752 | NWAT_1364 | acyl-ACP--UDP-N- acetylglucosamine O-acyltransferase                           | * | * | * |
| 2120 | 1547 | hypothetical conserved protein                                              | TAO_1156 | NHAL_1232 | NOC_1751 | -         | hypothetical conserved protein                                                 | * |   |   |
| 2121 | 770  | hydroxyacylglutathione hydrolase                                            | TAO_1155 | NHAL_1233 | NOC_1750 | NWAT_1366 | hydroxyacylglutathione hydrolase                                               | * | * | * |
| 2122 | 1158 | 4-hydroxy-3-methylbut-2-en-1-yl diphosphate synthase                        | TAO_1154 | NHAL_1234 | NOC_1749 | NWAT_1367 | 4-hydroxy-3-methylbut-2-en-1-yl diphosphate synthase                           | * | * | * |
| 2123 | 475  | hypothetical conserved protein                                              | TAO_1017 | NHAL_1235 | NOC_1748 | NWAT_1368 | hypothetical protein                                                           | * | * | * |
| 2124 | 1405 | hopanoid biosynthesis associated RND transporter like protein               | TAO_1153 | NHAL_1236 | NOC_1747 | NWAT_1369 | hopanoid biosynthesis associated RND transporter-like protein HpnN             | * | * | * |
| 2125 | 404  | hopanoid biosynthesis associated membrane protein HpnM                      | TAO_1152 | NHAL_1237 | NOC_1746 | NWAT_1370 | hopanoid biosynthesis associated membrane protein HpnM                         | * | * | * |
| 2126 | 1216 | hopanoid biosynthesis associated radical SAM protein HpnH                   | TAO_1150 | NHAL_1239 | NOC_1745 | NWAT_1371 | hopanoid biosynthesis associated radical SAM protein HpnH                      | * | * | * |
| 2127 | 965  | 4-hydroxy-3-methylbut-2-enyl diphosphate reductase                          | TAO_1149 | NHAL_1240 | NOC_1744 | NWAT_1372 | 4-hydroxy-3-methylbut-2-enyl diphosphate reductase                             | * | * | * |
| 2128 | 1379 | 1-deoxy-D-xylulose-5-phosphate synthase                                     | TAO_1148 | NHAL_1241 | NOC_1743 | NWAT_1373 | 1-deoxy-D-xylulose-5-phosphate synthase                                        | * | * | * |
| 2129 | 1634 | -                                                                           | -        | NHAL_1242 | NOC_1742 | NWAT_1374 | copper resistance protein copC                                                 | * |   |   |
| 2130 | 2191 | -                                                                           | -        | NHAL_1243 | NOC_1741 | NWAT_1375 | copper resistance D domain-containing protein                                  | * |   |   |
| 2131 | 1416 | glycogen debranching protein GlgX                                           | TAO_1147 | NHAL_1244 | NOC_1740 | NWAT_1376 | glycogen debranching protein GlgX                                              | * | * | * |
| 2132 | 1425 | 5-methyltetrahydropteroyltrimethylglutamate--homocysteine methyltransferase | TAO_1146 | NHAL_1245 | NOC_1739 | NWAT_1377 | 5-methyltetrahydropteroyltrimethylglutamate-- homocysteine S-methyltransferase | * | * | * |
| 2133 | 126  | radical SAM domain-containing protein                                       | TAO_1019 | NHAL_1246 | NOC_1738 | NWAT_1378 | radical SAM domain-containing protein                                          | * | * | * |
| 2134 | 1874 | -                                                                           | -        | NHAL_2073 | NOC_1737 | NWAT_1380 | hypothetical protein                                                           | * |   |   |
| 2135 | 2265 | -                                                                           | -        | NHAL_2075 | NOC_1735 | NWAT_1381 | acyl-coA dehydrogenase                                                         | * |   |   |
| 2136 | 2108 | -                                                                           | -        | NHAL_2076 | NOC_1734 | NWAT_1382 | acetyl-coA acetyltransferase                                                   | * |   |   |
| 2137 | 2241 | -                                                                           | -        | NHAL_2077 | NOC_1733 | NWAT_1383 | 3-hydroxyacyl-coA dehydrogenase NAD-binding protein                            | * |   |   |
| 2138 | 2740 | -                                                                           | -        | NHAL_2078 | NOC_1732 | -         | cytochrome B561                                                                | * |   |   |
| 2139 | 343  | hypothetical conserved protein                                              | TAO_0999 | NHAL_2083 | NOC_1731 | NWAT_1405 | hypothetical protein                                                           | * | * | * |
| 2140 | 1368 | organic solvent tolerance protein                                           | TAO_1369 | NHAL_2084 | NOC_1724 | NWAT_1394 | organic solvent tolerance protein                                              | * | * | * |
| 2141 | 1131 | peptidyl-prolyl cis-trans isomerase                                         | TAO_1368 | NHAL_2085 | NOC_1723 | NWAT_1393 | PpiC-type peptidyl-prolyl cis-trans isomerase                                  | * | * | * |
| 2142 | 951  | 4-hydroxythreonine-4-phosphate dehydrogenase                                | TAO_1367 | NHAL_2086 | NOC_1722 | NWAT_1392 | 4-hydroxythreonine-4-phosphate dehydrogenase                                   | * | * | * |
| 2143 | 762  | 16S rRNA methyltransferase                                                  | TAO_1366 | NHAL_2087 | NOC_1721 | NWAT_1390 | 16S rRNA methyltransferase                                                     | * | * | * |
| 2144 | 536  | septum formation protein Maf                                                | TAO_1365 | NHAL_2088 | NOC_1720 | NWAT_1389 | Maf protein                                                                    | * | * | * |
| 2145 | 1333 | phosphoglucomutase/phosphomannomutase alpha/beta/alpha domain I             | TAO_1363 | NHAL_2091 | NOC_1719 | NWAT_1388 | phosphoglucomutase/phosphomannomutase alpha/beta/alpha domain I                | * | * | * |
| 2146 | 2229 | heat shock protein Hsp90                                                    | TAO_1362 | NHAL_2092 | NOC_1718 | -         | heat shock protein Hsp90                                                       | * |   |   |
| 2147 | 1827 | -                                                                           | -        | NHAL_2093 | NOC_1717 | NWAT_1410 | LuxR family two component transcriptional regulator                            | * |   |   |
| 2148 | 1717 | -                                                                           | -        | NHAL_2095 | NOC_1716 | NWAT_1411 | BadM/Rrf2 family transcriptional regulator                                     | * |   |   |
| 2149 | 2077 | -                                                                           | -        | NHAL_2096 | NOC_1715 | NWAT_1412 | hypothetical protein                                                           | * |   |   |
| 2150 | 1833 | -                                                                           | -        | NHAL_2097 | NOC_1714 | NWAT_1413 | ErfK/YbiS/YcfS/YnhG family protein                                             | * |   |   |
| 2151 | 692  | β-lactamase hydrolase-like protein                                          | TAO_1360 | NHAL_2098 | NOC_1713 | NWAT_1414 | metallo-β-lactamase protein                                                    | * | * | * |
| 2152 | 2744 | -                                                                           | -        | -         | NOC_1712 | NWAT_1416 | arginase/agmatinase/formiminoglutamase                                         | * |   |   |
| 2153 | 2109 | -                                                                           | -        | NHAL_1430 | NOC_1711 | NWAT_1417 | ornithine aminotransferase                                                     | * |   |   |
| 2154 | 1738 | -                                                                           | -        | NHAL_1433 | NOC_1708 | NWAT_1418 | water stress and hypersensitive response domain-containing protein             | * |   |   |
| 2155 | 1569 | -                                                                           | -        | NHAL_1434 | NOC_1707 | NWAT_1419 | hypothetical protein                                                           | * |   |   |
| 2156 | 1768 | -                                                                           | -        | NHAL_1435 | NOC_1706 | NWAT_1420 | ferritin Dps family protein                                                    | * |   |   |
| 2157 | 2285 | -                                                                           | -        | NHAL_1437 | NOC_1705 | NWAT_1421 | δ-1-pyrroline-5-carboxylate dehydrogenase                                      | * |   |   |
| 2158 | 1729 | -                                                                           | -        | NHAL_1438 | NOC_1704 | NWAT_1422 | response regulator receiver protein                                            | * |   |   |
| 2159 | 2033 | -                                                                           | -        | NHAL_1439 | NOC_1703 | NWAT_1423 | PAS/PAC sensor signal transduction histidine kinase                            | * |   |   |

|      |      |                                                |          |                        |          |                        |                                                     |   |   |   |
|------|------|------------------------------------------------|----------|------------------------|----------|------------------------|-----------------------------------------------------|---|---|---|
| 2160 | 1944 | -                                              | -        | NHAL_1441              | NOC_1702 | NWAT_1424              | RpoD subfamily RNA polymerase sigma 70 subunit      | * |   |   |
| 2161 | 1784 | -                                              | -        | NHAL_1442              | NOC_1701 | NWAT_1425              | LuxR family two component transcriptional regulator | * |   |   |
| 2162 | 2151 | -                                              | -        | NHAL_1443              | NOC_1700 | NWAT_1426              | PAS sensor, signal transduction histidine kinase    | * |   |   |
| 2163 | 1915 | -                                              | -        | NHAL_1444              | NOC_1699 | NWAT_1427              | hypothetical protein                                | * |   |   |
| 2164 | 888  | integrase family protein                       | TAO_0274 | NHAL_4009              | NOC_1698 | NWAT_1428              | integrase family protein                            | * | * | * |
| 2165 | 1095 | carbohydrate kinase                            | TAO_0950 | NHAL_1445              | NOC_1697 | NWAT_1429              | carbohydrate kinase                                 | * | * | * |
| 2166 | 423  | 7-cyano-7-deazaguanine reductase               | TAO_0951 | NHAL_1446              | NOC_1696 | NWAT_1430              | 7-cyano-7-deazaguanine reductase                    | * | * | * |
| 2167 | 1446 | chromosome segregation protein SMC             | TAO_0952 | NHAL_1447              | NOC_1695 | NWAT_1431              | chromosome segregation protein SMC                  | * | * | * |
| 2168 | 643  | cell division protein ZipA                     | TAO_0953 | NHAL_1448              | NOC_1694 | NWAT_1432              | cell division protein ZipA                          | * | * | * |
| 2169 | 1351 | DNA ligase, NAD-dependent                      | TAO_0954 | NHAL_1449              | NOC_1693 | NWAT_1433              | NAD-dependent DNA ligase                            | * | * | * |
| 2170 | 149  | BFD (2Fe-2S)-binding domain-containing protein | TAO_0955 | NHAL_1450              | NOC_1692 | NWAT_1434              | BFD (2Fe-2S)-binding domain-containing protein      | * | * | * |
| 2171 | 383  | secondary thiamine-phosphate synthase enzyme   | TAO_0956 | NHAL_1451              | NOC_1691 | NWAT_1435              | secondary thiamine-phosphate synthase enzyme        | * | * | * |
| 2172 | 553  | lipase                                         | TAO_0957 | NHAL_1452              | NOC_1690 | NWAT_1436              | lipase                                              | * | * | * |
| 2173 | 349  | hypothetical conserved protein                 | TAO_0959 | NHAL_1453              | NOC_1689 | NWAT_1437              | hypothetical protein                                | * | * | * |
| 2174 | 1728 | hypothetical conserved protein                 | TAO_0961 | NHAL_1455              | NOC_1688 |                        | hypothetical conserved protein                      | * |   |   |
| 2175 | 1361 | heme ABC transporter ATP-binding protein       | TAO_0962 | NHAL_1456              | NOC_1687 | NWAT_1438              | ABC transporter ATP-binding protein                 | * | * | * |
| 2176 | 1905 | -                                              | -        | NHAL_1457              | NOC_1686 | NWAT_1439              | glycerophosphoryl diester phosphodiesterase         | * |   |   |
| 2177 | 1530 | -                                              | -        | NHAL_1459              | NOC_1685 | NWAT_1440              | hypothetical protein                                | * |   |   |
| 2178 | 1603 | -                                              | -        | NHAL_1460              | NOC_1684 | NWAT_1441              | hypothetical protein                                | * |   |   |
| 2179 | 2209 | -                                              | -        | NHAL_1461              | NOC_1683 | NWAT_1442              | hypothetical protein                                | * |   |   |
| 2180 | 2159 | -                                              | -        | NHAL_1911              | NOC_1682 | NWAT_1443              | phospholipase D/transphosphatidylase                | * |   |   |
| 2181 | 2632 | -                                              | -        | NHAL_1312              | NOC_1494 |                        | response regulator receiver                         | * |   |   |
| 2182 | 2817 | -                                              | -        | NHAL_1313              | NOC_1495 |                        | PAS sensor signal transduction histidine kinase     | * |   |   |
| 2183 | 2707 | -                                              | -        | NHAL_1314              | NOC_1496 |                        | capsular polysaccharide biosynthesis protein        | * |   |   |
| 2184 | 1533 | -                                              | -        | NHAL_1315              | NOC_1497 | NWAT_2858<br>NWAT_2851 | chromosome partitioning ATPase-like protein         | * |   |   |
| 2185 | 2783 | -                                              | -        | NHAL_1316              | NOC_1499 |                        | hypothetical protein                                | * |   |   |
| 2186 | 2841 | -                                              | -        | NHAL_1319              | NOC_1503 |                        | binding-protein-dependent transport system protein  | * |   |   |
| 2187 | 1678 | -                                              | -        | NHAL_1323              | NOC_1513 |                        | polysaccharide biosynthesis protein                 | * |   |   |
| 2188 | 1155 | GDP-mannose 4,6-dehydratase                    | TAO_0964 | NHAL_1331              | NOC_1523 | NWAT_1618              | GDP-mannose 4,6-dehydratase                         | * | * | * |
| 2189 | 1522 | -                                              | -        | NHAL_1332              | NOC_1524 | NWAT_1617              | group 1 glycosyl transferase                        | * |   |   |
| 2190 | 2111 | -                                              | -        | NHAL_1687              | NOC_1528 | NWAT_1614              | outer membrane efflux protein                       | * |   |   |
| 2191 | 2140 | -                                              | -        | NHAL_1688              | NOC_1529 | NWAT_1613              | RND family efflux transporter MFP subunit           | * |   |   |
| 2192 | 2289 | -                                              | -        | NHAL_1689              | NOC_1530 | NWAT_1612              | CzcA family heavy metal efflux pump                 | * |   |   |
| 2193 | 25   | metallo-beta-lactamase family protein          | TAO_0973 | NHAL_2910<br>NHAL_3161 | NOC_1532 | NWAT_1610              | metallo-β-lactamase protein                         | * | * |   |
| 2194 | 1294 | copper-translocating P-type ATPase             | TAO_0276 | NHAL_1708              | NOC_1533 | NWAT_1608              | heavy metal translocating P-type ATPase             | * | * | * |
| 2195 | 1837 | -                                              | -        | NHAL_1685              | NOC_1534 | NWAT_1607              | cation diffusion facilitator family transporter     | * |   |   |
| 2196 | 2492 | -                                              | -        |                        | NOC_1899 | NWAT_1254              | hypothetical protein                                | * |   |   |
| 2197 | 61   | -                                              | -        | NHAL_1470              | NOC_1855 | NWAT_1261              | hypothetical protein                                | * |   |   |
| 2198 | 2747 | -                                              | -        |                        | NOC_1853 | NWAT_1263              | mechanosensitive ion channel protein MscS           | * |   |   |
| 2199 | 2202 | -                                              | -        | NHAL_1554              | NOC_1851 | NWAT_1264              | TPR repeat-containing protein                       | * |   |   |
| 2200 | 1775 | -                                              | -        | NHAL_1555              | NOC_1850 | NWAT_1265              | nitric-oxide reductase                              | * |   |   |
| 2201 | 80   | nitric-oxide reductase                         | TAO_0114 | NHAL_1556              | NOC_1849 | NWAT_1266              | nitric-oxide reductase subunit                      | * | * | * |
| 2202 | 1959 | -                                              | -        | NHAL_1557              | NOC_1848 | NWAT_1267              | ATPase AAA                                          | * |   |   |
| 2203 | 2230 | -                                              | -        | NHAL_1558              | NOC_1847 | NWAT_1268              | Von Willebrand factor type A                        | * |   |   |
| 2204 | 2896 | -                                              | -        | NHAL_1559              | NOC_1846 |                        | hypothetical protein                                | * |   |   |
| 2205 | 2449 | -                                              | -        | NHAL_1560              | NOC_1845 |                        | hypothetical protein                                | * |   |   |
| 2206 | 2766 | -                                              | -        | NHAL_1562              | NOC_1844 |                        | hypothetical protein                                | * |   |   |
| 2207 | 66   | hypothetical conserved protein                 | TAO_1001 | NHAL_1374              | NOC_1385 | NWAT_1701              | hypothetical protein                                | * | * | * |
| 2208 | 2650 | -                                              | -        | NHAL_1375              | NOC_1386 |                        | hypothetical protein                                | * |   |   |

|      |      |                                                                                   |                 |                        |          |              |                                                                            |   |   |   |
|------|------|-----------------------------------------------------------------------------------|-----------------|------------------------|----------|--------------|----------------------------------------------------------------------------|---|---|---|
| 2209 | 2267 | -                                                                                 | -               | NHAL_1379              | NOC_1387 | NWAT_1694    | peptidase S16, ATP-dependent protease La                                   | * |   |   |
| 2210 | 1679 | -                                                                                 | -               | NHAL_1380              | NOC_1388 | NWAT_1693    | heat shock protein Hsp20                                                   | * |   |   |
| 2211 | 1951 | -                                                                                 | -               | NHAL_1381              | NOC_1389 | NWAT_1692    | glutamine amidotransferase class-II                                        | * |   |   |
| 2212 | 667  | <b>GTP cyclohydrolase I</b>                                                       | <b>TAO_0936</b> | NHAL_1382              | NOC_1390 | NWAT_1691    | GTP cyclohydrolase I                                                       | * | * | * |
| 2213 | 1972 | -                                                                                 | -               | NHAL_1353              | NOC_1391 | NWAT_1690    | phytanoyl-coA dioxygenase                                                  | * |   |   |
| 2214 | 2070 | -                                                                                 | -               | NHAL_1354              | NOC_1392 | NWAT_1689    | patatin                                                                    | * |   |   |
| 2215 | 1761 | <b>S-formylglutathione hydrolase</b>                                              | <b>TAO_1181</b> |                        | NOC_1393 | NWAT_1688    | S-formylglutathione hydrolase                                              | * |   |   |
| 2216 | 1980 | <b>S-(hydroxymethyl)glutathione dehydrogenase/class III alcohol dehydrogenase</b> | <b>TAO_1182</b> |                        | NOC_1394 | NWAT_1687    | S-(hydroxymethyl)glutathione dehydrogenase/class III alcohol dehydrogenase | * |   |   |
| 2217 | 752  | <b>phosphoglycerate mutase 1 family</b>                                           | <b>TAO_1124</b> | NHAL_1364              | NOC_1395 | NWAT_1686    | phosphoglycerate mutase 1 family                                           | * | * | * |
| 2218 | 562  | <b>trypsin-like serine protease</b>                                               | <b>TAO_1120</b> | NHAL_1588              | NOC_1396 | NWAT_1685    | peptidase S1 and S6 chymotrypsin/Hap                                       | * | * | * |
| 2219 | 2671 | -                                                                                 | -               |                        | NOC_1403 | NWAT_1684    | hypothetical protein                                                       | * |   |   |
| 2220 | 99   | <b>hypothetical conserved protein</b>                                             | <b>TAO_1110</b> | NHAL_1825<br>NHAL_1844 | NOC_1405 | NWAT_1682    | hypothetical protein                                                       | * | * |   |
| 2221 | 1449 | -                                                                                 | -               | NHAL_1826<br>NHAL_1845 | NOC_1406 | NWAT_1681    | ATPase P                                                                   | * |   |   |
| 2222 | 2086 | -                                                                                 | -               | NHAL_1828<br>NHAL_1847 | NOC_1408 |              | hypothetical protein                                                       | * |   |   |
| 2223 | 1707 | -                                                                                 | -               | NHAL_3868              | NOC_0263 | NWAT_0364    | blue copper domain-containing protein                                      | * |   |   |
| 2224 | 2669 | -                                                                                 | -               |                        | NOC_0265 | NWAT_0366    | hypothetical protein                                                       | * |   |   |
| 2225 | 2654 | -                                                                                 | -               |                        | NOC_0266 | NWAT_0367    | hypothetical protein                                                       | * |   |   |
| 2226 | 1628 | -                                                                                 | -               | NHAL_1584              | NOC_0267 | NWAT_0368    | calcium-binding EF-hand protein-containing protein                         | * |   |   |
| 2227 | 2221 | -                                                                                 | -               | NHAL_1585(2)           | NOC_0268 | NWAT_0369(2) | transaldolase                                                              | * |   |   |
| 2228 | 991  | <b>transaldolase</b>                                                              | <b>TAO_0974</b> | NHAL_1585(1)           | NOC_0269 | NWAT_0369(1) | transaldolase                                                              | * | * | * |
| 2229 | 457  | <b>PA-phosphatase-like phosphoesterase</b>                                        | <b>TAO_0975</b> | NHAL_1586              | NOC_0270 | NWAT_0370    | PA-phosphatase-like phosphoesterase                                        | * | * | * |
| 2230 | 1889 | -                                                                                 | -               | NHAL_1587              | NOC_0271 | NWAT_0371    | nicotinamidase                                                             | * |   |   |
| 2231 | 2224 | -                                                                                 | -               | NHAL_1589              | NOC_0272 | NWAT_0372    | ATP-dependent metalloprotease FtsH                                         | * |   |   |
| 2232 | 1984 | -                                                                                 | -               | NHAL_1590              | NOC_0273 | NWAT_0373    | Fis family sigma-54 specific transcriptional regulator                     | * |   |   |
| 2233 | 1564 | -                                                                                 | -               | NHAL_1592              | NOC_0274 | NWAT_0374    | CsbD-like protein                                                          | * |   |   |
| 2234 | 1642 | -                                                                                 | -               | NHAL_1601              | NOC_0275 | NWAT_0375    | hypothetical protein                                                       | * |   |   |
| 2235 | 1770 | -                                                                                 | -               | NHAL_1602              | NOC_0276 | NWAT_0376    | LuxR family two component transcriptional regulator                        | * |   |   |
| 2236 | 1890 | -                                                                                 | -               | NHAL_3083              | NOC_0277 | NWAT_0377    | SMP-30/gluconolactonase/IRE domain-containing protein                      | * |   |   |
| 2237 | 142  | <b>transport-associated protein</b>                                               | <b>TAO_0976</b> | NHAL_1607              | NOC_0278 | NWAT_0379    | transport-associated protein                                               | * | * | * |
| 2238 | 2042 | -                                                                                 | -               | NHAL_1608              | NOC_0279 | NWAT_0380    | ABC transporter-like protein                                               | * |   |   |
| 2239 | 1992 | -                                                                                 | -               | NHAL_1609              | NOC_0280 | NWAT_0381    | binding-protein-dependent transport system inner membrane protein          | * |   |   |
| 2240 | 2002 | -                                                                                 | -               | NHAL_1610              | NOC_0281 | NWAT_0382    | binding-protein-dependent transport system inner membrane protein          | * |   |   |
| 2241 | 2065 | -                                                                                 | -               | NHAL_1611              | NOC_0282 | NWAT_0383    | family 1 extracellular solute-binding protein                              | * |   |   |

Black bold characters show core genes conserved in the TAO100 genome and the blue bold characters show the missing genes in the genome. The parentheses mean part of domain-split gene.
